1 **Towards a global perspective for *Salvia* L: Phylogeny, diversification, and floral evolution**

2 Fatemeh Moein\*<sup>1</sup>, Ziba Jamzad<sup>2</sup>, Mohammadreza Rahiminejad<sup>1</sup>, Jacob B. Landis<sup>4,5</sup>, Mansour  
3 Mirtadzadini<sup>3</sup>, Douglas E. Soltis\*<sup>6,7,8,9</sup> and Pamela S. Soltis<sup>7,8,9</sup>

4 <sup>1</sup>Department of Biology, Faculty of Science, University of Isfahan, Iran;

5 <sup>2</sup>Department of Botany, Research Institute of Forest and Rangelands, Tehran, Iran;

6 <sup>3</sup>Department of Biology, Faculty of Science, Shahid Bahonar Univ., PO Box 76169-133,  
7 Kerman, Iran

8 <sup>4</sup>School of Integrative Plant Science, Section of Plant Biology and the L.H. Bailey Hortorium,  
9 Cornell University, Ithaca, NY 14853, USA

10 <sup>5</sup>BTI Computational Biology Center, Boyce Thompson Institute, Ithaca, NY 14853, USA

11 <sup>6</sup>Department of Biology, University of Florida, Gainesville, FL 32611, USA

12 <sup>7</sup>Florida Museum of Natural History, University of Florida, Gainesville, Florida 32611, USA

13 <sup>8</sup>The Genetics Institute, University of Florida, Gainesville, Florida 32610, USA

14 <sup>9</sup>The Biodiversity Institute, University of Florida, Gainesville, Florida 32611, USA

15

16 \*Author for correspondence

17

18

19 **Abstract**

20 *Premise of this study:* *Salvia* is the most species-rich genus in Lamiaceae, encompassing  
21 approximately 1000 species distributed all over the world. We sought a new evolutionary  
22 perspective for *Salvia* by employing macroevolutionary analyses to address the tempo and  
23 mode of diversification. To study the association of floral traits with speciation and extinction,  
24 we modeled and explored the evolution of corolla length and the lever-mechanism pollination  
25 system across our *Salvia* phylogeny.

26 *Methods:* We reconstructed a multigene phylogeny for 366 species of *Salvia* in the broad  
27 sense including all major recognized lineages and numerous species from Iran, a region  
28 previously overlooked in studies of the genus. Our phylogenetic data in combination with  
29 divergence time estimates were used to examine the evolution of corolla length, woody vs.  
30 herbaceous habit, and presence vs. absence of a lever mechanism. We investigated the timing  
31 and dependence of *Salvia* diversification related to corolla length evolution through a  
32 disparity test and BAMM analysis. A HiSSE model was used to evaluate the dependency of  
33 diversification on the lever-mechanism pollination system in *Salvia*.

34 *Key Results:* Based on recent investigations and classifications, *Salvia* is monophyletic and  
35 comprises ~1000 species. Our inclusion, for the first time, of a comprehensive sampling for  
36 Iranian species of *Salvia* provides higher phylogenetic resolution for southwestern Asian  
37 species than obtained in previous studies. A medium corolla length (15-18mm) was  
38 reconstructed as the ancestral state for *Salvia* with multiple shifts to shorter and longer  
39 corollas. Macroevolutionary model analyses indicate that corolla length disparity is high  
40 throughout *Salvia* evolution, significantly different from expectations under a Brownian  
41 motion model during the last 28 million years of evolution. Our analyses show evidence of a  
42 higher diversification rate of corolla length for some Andean species of *Salvia* compared to  
43 other members of the genus. Based on our tests of diversification models, we reject the  
44 hypothesis of a direct effect of the lever mechanism on *Salvia* diversification.

45 *Conclusions:* Using a broader species sampling than previous studies, we obtained a well-  
46 resolved phylogeny for southwest Asian species of *Salvia*. Corolla length is an adaptive trait  
47 throughout the *Salvia* phylogeny with a higher rate of diversification in the South American

48 clade. Our results suggest caution in considering the lever-mechanism pollination system as  
49 one of the main drivers of speciation in *Salvia*.

50 *Key words: Salvia, phylogeny, diversification, corolla, pollination, lever mechanism*

## 51 **1. Introduction**

52 Integrating molecular data with organismal traits can be used to address a major question in  
53 biology, “Is higher species diversity related to the presence of specific traits in that lineage?”  
54 (Pyron and Tubrin, 2014). Recently developed model-based approaches for estimating  
55 divergence times (BEAST: Drummond and Rambaut 2007; treePL: Smith and O’Meara 2010),  
56 diversification rates (MEDUSA: Alfaro et al., 2009; BAMM: Rabosky et al., 2014), and the effect  
57 of traits on diversification (FitzJohn et al., 2012; Beaulieu and O’Meara 2016; Caetano et al.,  
58 2018; Landis et al., 2018; Han et al., 2020) provide new opportunities to address this question.  
59 These methods have the advantage of providing estimates of the origin, divergence time, rate  
60 of diversification, and drivers of diversification among species.

61 There has been considerable recent interest in studying the association of floral traits and  
62 species richness in flowering plants (Vamosi et al., 2011; Van der Niet and Johnson 2014; Soltis  
63 & Soltis 2014; Saquet et al., 2017; Landis et al., 2018; Onstein 2019; Hernández and Wiens  
64 2020). Interactions between flowers and their pollinators have spurred speciation and the  
65 evolution of novel floral variation (e.g., Stebbins 1970; Dodd et al., 1999; Crane et al., 1995;  
66 Crepet 2000; Soltis and Soltis 2004; Soltis et al., 2008; Ambruster 2014; Fenster et al., 2004;  
67 Smith 2010; Van der Niet and Johnson 2014). Some floral traits such as spur length, corolla  
68 shape, corolla length, and number of flowers are more often influenced by selection than  
69 other floral features (Yoshioka, 2007; Kacowski et al., 2012; Landis et al., 2016). Floral  
70 specialization could potentially promote diversification by the evolution of adaptive floral  
71 traits through the establishment of reproductive isolation (Kay and Sargent 2009, Armbruster  
72 2014; Serrano-Serrano et al., 2015). Several studies have also shown a correlation between  
73 flower specialization and rate of diversification (Fernández-Mazuecos et al., 2013; Ogutcen et  
74 al., 2014; Lagomarsino et al., 2016). For example, in genera of Neotropical Gesneriaceae  
75 including *Codonanthesis* Mansf, *Codonanthe* (Mart.) Hanst, and *Nematanthus* Schard,  
76 species with hummingbird pollination syndromes have higher rates of diversification than  
77 close relatives pollinated by insects (Serrano-Serrano et al., 2015).

78 Lamiaceae (the mints) are the sixth largest family of flowering plants with over 7000 species  
79 distributed worldwide (Harley et al., 2004). Recently, Li et al. (2016, 2017) subdivided  
80 Lamiaceae into ten subfamilies and four unplaced genera based on a large-scale, plastid-  
81 based phylogenetic analysis, and this topology was largely corroborated by analysis of nuclear  
82 transcriptomes (Mint Evolutionary Genomics Consortium 2018). Within Lamiaceae,  
83 Nepetoideae is the largest subfamily with 105 genera and 3600 species, including well-known  
84 genera such as *Thymus* L. (thyme), *Ocimum* L. (basil), *Nepeta* L. (catnip), *Salvia* L. (sage), and  
85 *Lavandula* L. (lavender) (Harley et al., 2004).

86 *Salvia*, the largest genus in Lamiaceae as currently defined, includes approximately 1000  
87 species, more than half of which are distributed in North and South America (Alziar, 1988-  
88 1993). Morphologically, *Salvia* is highly diverse, particularly regarding specialized floral traits  
89 such as corolla color, corolla and tube length, flower shape and stamen structure (Wester and  
90 Claßen-Bockhoff, 2007; Reith et al., 2007; Will and Claßen-Bockhoff, 2015). Traditionally,  
91 *Salvia* was separated from other genera in Lamiaceae by possessing two fertile stamens with  
92 an elongated connective tissue. More than 80% of *Salvia* species are characterized by a special  
93 pollination system referred to as a lever mechanism (Walker et al., 2004; Harely et al., 2004;  
94 Claßen-Bockhoff et al., 2004; Walker and Sytsma, 2007). transfer to the stigma. The lever  
95 mechanism has the advantage of promoting successful pollination. In addition, this approach  
96 is efficient in pollen allocation and does not allow the pollinator to collect all of the pollen in  
97 one visit (Claßen-Bockhoff et al., 2003; Reith et al., 2007; Celep et al., 2014). A staminal lever  
98 is an advantage in *Salvia* due to the precise placement of pollen on bees while they are  
99 accessing the restricted nectar (Claßen-Bockhoff et al., 2004; Zhang et al. (2011) showed that  
100 removing the lever arms in *Salvia cyclostegia* resulted in lower fruit and seed set. Previous  
101 morphological studies of *Salvia* pollinators and floral traits hypothesized that the lever  
102 mechanism might play a role as a key innovation in promoting adaptive radiations (Claßen-  
103 Bockhoff et al., 2004; Will and Claßen-Bockhoff 2014). Based on phylogenetic results, the  
104 lever mechanism evolved in parallel in the Eastern and Western Hemispheres (Walker and  
105 Sytsma, 2007).

106 Since the initial phylogenetic study on Menthineae (Wagstaff and Olmstead, 1995), several  
107 studies have been performed based on nuclear and plastid regions with increasing taxonomic  
108 sampling of *Salvia* species (Walker and Sytsma, 2007; Takano and Okado 2011; Will and

109 Claßen-Bockhoff, 2014; Drew and Sytsma, 2012; Will et al., 2015; Will and Claßen-Bockhoff,  
110 2017; Hu et al., 2018; Drew et al., 2017; Fragoso-Martinez et al., 2017; Kriebel et al., 2019;  
111 Wu et al., 2021). In the first molecular study of *Salvia* (based on *rbcl* and the *trnL-trnF*  
112 regions), Walker and Sytsma (2004) found that *Salvia* is not monophyletic and recognized  
113 three clades: clade I includes many species of *Salvia* from the Eastern Hemisphere along with  
114 a Western Hemisphere lineage (8 species from former sect. *Heterosphacea* and subgen.  
115 *Salviaostrum*), clade II comprises North and South American species and includes subgen.  
116 *Calosphace* Benth. and subgen. *Audbertia* Benth, and clade III comprises species from eastern  
117 North Africa and southwestern Asia. *Rosmarinus* L. and *Perovskia* Karel. were placed as sisters  
118 to clade I, while *Dorystaechas* Boiss. & Heldr. ex Benth, distributed in Turkey, was placed with  
119 clade II.

120 Walker and Sytsma (2007), with increased taxon sampling for *Salvia* and related genera in  
121 Menthineae, found that *Meriandra* Benth and *Dorystaechas* formed the sister clade to North  
122 and South American species of *Salvia* (clade II). They referred to *Zhumeria* Rech.f & Wendelbo  
123 (a monotypic genus endemic to Iran) along with southwest and East Asian *Salvia* as clade III.  
124 Will and Claßen-Bockhoff (2014) excluded the East Asian *Salvia* species from Walker and  
125 Sytsma's (2007) clade III and considered them to represent an independent lineage (Clade IV).  
126 Will and Claßen-Bockhoff (2017) suggested breaking the large *Salvia* group into six genera:  
127 *Salvia sensu stricto*, *Ramonia* Raf., *Lasemia* Raf., *Glutinaria* Raf., *Pleudia*, and *Polakia*.  
128 However, they did not provide a taxonomic revision. Drew et al. (2017) embedded these five  
129 genera into a broadly defined *Salvia* and treated each as a subgenus. In recent phylogenetic  
130 studies of *Salvia*, Hu et al. (2018) and Kriebel et al. (2019) followed and updated the Drew et  
131 al. (2017) classification of *Salvia*, recognizing 11 subgenera. In this study, to maintain stability  
132 in taxonomic definition and nomenclature, we follow the broad definition of *Salvia* (Drew et  
133 al., 2017; Hu et al., 2018; Kriebel et al., 2019). A schematic diagram of changes in *Salvia*  
134 delimitation based on previous phylogenetic studies is provided in **Figure 1**.

135 Frequent endemism and enormous morphological diversity have made interpretation of the  
136 evolutionary patterns within *Salvia* challenging, particularly given the limited taxon sampling  
137 for some areas, such as southwestern Asia. To improve taxon sampling for southwestern Asia  
138 and to clarify patterns of morphological evolution and species diversification, we generated  
139 new sequences for 50 Iranian species of *Salvia* and reconstructed a phylogeny for 351 species

140 overall. Notably, other recent phylogenetic analyses of *Salvia* differ in scope and emphasis  
141 from our investigation. Kriebel et al. (2019) studied the effect of biome shifts and pollinators  
142 on the radiation of *Salvia*. They found that shifts in pollination system are not correlated with  
143 species diversification, except in subgen. *Calosphace* in the Western Hemisphere where  
144 species are pollinated by hummingbirds. Kriebel et al. (2020) showed that the respective floral  
145 morphospaces of the Western and Eastern Hemisphere *Salvia* are different. They inferred  
146 that these differences in flower morphology are linked with shifts from bee to bird pollination.  
147 In another recent study, Wester et al. (2020) found that shifts from bee- to bird-pollinated  
148 *Salvia* are mostly associated with floral structure rather than floral colors.

149 Despite valuable contributions, the relationship between the evolution of floral traits and  
150 patterns of *Salvia* diversification is not well understood. We used our new phylogenetic tree  
151 for *Salvia* to trace patterns of both character evolution and diversification. We primarily focus  
152 on the role of corolla length as one of the putative characters involved in *Salvia* diversification.  
153 This is also the first attempt to trace the evolutionary history of corolla length in *Salvia* and  
154 its association with diversification. Furthermore, we reconstructed the ancestral state for  
155 lever mechanism and habitat with greater taxon sampling than in previous work (Will and  
156 Claßen-Bockhoff 2014). In addition, we shed new light on the role of the pollination system  
157 in *Salvia* diversification. We statistically examine the longstanding hypothesis that the lever  
158 mechanism in *Salvia* flowers is correlated with high diversity and species richness.

## 159 **2. Materials & Methods**

### 160 **2.1. Taxon Sampling**

161 In total, 366 taxa representing 351 species covering all major areas of the geographic  
162 distribution of *Salvia* were used to reconstruct the phylogeny. As noted, we considered *Salvia*  
163 in the broad sense and included *Zhumeria*, *Meriandra*, *Rosmarinus*, and *Perovskia* (Drew et  
164 al., 2017, Kriebel et al., 2019). Following Drew and Sytsma (2012), we selected *Melissa* and  
165 *Lepechinia* as outgroups. We generated new sequences for many Iranian species of *Salvia*,  
166 including 50 species (59 accessions) for the external transcribed spacer (ETS) region of nuclear  
167 ribosomal DNA, 46 species (47 accessions) for ITS, and 35 species for the *ycf1-rps15* region of  
168 the plastome. The remaining sequences used here (representing 216 species) were obtained  
169 from GenBank. We concatenated all sequences for the three plastid regions (*rpl32*, *trnL-trnF*,

170 *ycf1-rps15*) and two nuclear regions (ITS, ETS); the plastid and nuclear data sets were each  
171 analyzed separately and then combined, given the highly similar topologies obtained for each.  
172 That is, there was no strongly supported incongruence or conflict (hard incongruence sensu  
173 Seelanan et al., 1997) between nuclear and plastid trees. The newly generated sequences  
174 were deposited in GenBank. Corresponding information for each voucher specimen is  
175 provided in Table 1.

## 176 **2.2. DNA extraction, amplification, and sequencing**

177 Total DNA was extracted from herbarium and silica-dried material using a modified CTAB  
178 method (Doyle & Doyle 1987) in which, to break down secondary metabolites, the mixture of  
179 ground leaf tissue and CTAB solution was kept at room temperature for 24 hours. ITS, ETS,  
180 and *ycf1* regions were amplified using the polymerase chain reaction (PCR) with each sample  
181 prepared in 25- $\mu$ l volumes with the following components: 1  $\mu$ l of DNA solution (20 ng), 2.5  
182  $\mu$ l of reaction buffer, 2  $\mu$ l dNTP mix (0.2 mM), 1  $\mu$ l of each primer (10  $\mu$ M), 1  $\mu$ l of MgCl<sub>2</sub>, and  
183 1.5  $\mu$ l of *Taq* DNA polymerase. The PCR conditions for the nuclear regions for most species  
184 were: 95°C for 2 minutes, 32 cycles of denaturation for 20 seconds at 94°C, primer annealing  
185 for 20 seconds at 50°C, and 2 minutes extension at 72°C, with a final extension of 7 minutes  
186 at 72°C. For the *ycf1* region, we modified the annealing temperature to 52°C for 1 minute  
187 (PCR optimization was set based on personal communication with B. Drew). High-quality PCR  
188 products were sequenced on an ABI 3730 DNA Analyzer (Applied Biosystems, Inc.) at the  
189 University of Florida Interdisciplinary Center for Biotechnology Research (ICBR).

190

## 191 **2.3. Alignment and phylogenetic analysis**

192 All consensus DNA sequences were generated using Geneious Pro v. 10.22 (Biomatters,  
193 Auckland, New Zealand). Alignments were performed with the MAFFT plugin in Geneious with  
194 manual adjustment. Maximum likelihood analysis was performed using the CIPRES Science  
195 Gateway with RAxML HPC v.8 on XSEDE using the GTRGAMMA model with \_Fa (rapid  
196 bootstrapping analysis/search for the best ML tree) with 1000 iterations for bootstrapping.  
197 Default settings were used for other options. Phylogenetic analyses were conducted for 1) all  
198 plastid loci (*rpl32-trnI*, *trnI-trnf*, and *ycf1-rps15*), 2) both nuclear loci (ITS and ETS), and 3) a  
199 combined data set of plastid and nuclear loci.

200

#### 201 **2.4. BEAST analysis (divergence time estimation)**

202 We estimated divergence times using BEAST version 2.2.0 (Bouckaert et al., 2014) under the  
203 uncorrelated lognormal model. Priors for the branch rate were assumed as a Yule process. A  
204 node prior was calibrated for the most recent common ancestor (MRCA) of *Melissa* and  
205 *Lepechinia* (28.4 Ma with a mean of 1.5 and a SD of 0.5; Drew and Sytsma 2012; Kriebel et al.,  
206 2019) with a lognormal distribution. The BEAST analysis was performed with two independent  
207 runs of Markov Chain Monte Carlo. Each run was performed for  $2 \times 10^8$  generations, with  
208 parameters logged every 1000 generations. We used Tracer v. 1.6 to evaluate the ESS  
209 (Effective Sample Size) to assure that the chains were run sufficiently long. An ESS > 200  
210 indicates that the two independent runs were adequate. Tree Annotator was used to find the  
211 maximum clade credibility reporting median node ages after discarding the first 10% of the  
212 generations as burn-in.

213

#### 214 **2.5. Ancestral state reconstruction**

215 Two characters with discrete states were scored: mode of lever mechanism (present / absent)  
216 and habit (woody / herbaceous). We treated shrubs and subshrubs as woody; however,  
217 distinguishing woody from herbaceous is not always straightforward because some mostly  
218 herbaceous plants may become woody in special climatic situations (FitzJohn et al., 2014;  
219 Zanne et al., 2014). Therefore, we treated a species as woody if it is considered a shrub or  
220 subshrub in the literature or if it was defined as having a woody rootstock. In addition, the  
221 continuous character corolla length was measured from the joint of the calyx to the end of  
222 the upper lip.

223 The relevant data for the discrete and continuous traits were collected from the literature:  
224 *Flora of China* ([www.efloras.org/flora\\_page.asp?flora\\_id=2](http://www.efloras.org/flora_page.asp?flora_id=2)), *California Salvia* (Epling, 1983),  
225 *Flora of USSR* (Pobedimova, 1954), *Flora of Turkey and the East Aegeans* (Hedge, 1982), *Flora*  
226 *Iranica* (Hedge, 1982), *Flora of Southern Africa* (Codd, 1985), *Flora of Madagascar* (Hedge,  
227 1992), *Flora dels Paisos Catalans* (Bolos and Vigo, 1995; Wester and Claßen-Bockhoff, 2011),  
228 and *Flora of Iran* (Jamzad, 2012). Additionally, we used online resources ([www.gbif.org](http://www.gbif.org);  
229 [www.tropicos.org](http://www.tropicos.org)) as sources of data. For some species, the corolla length was measured  
230 using the digitized type specimen available on JSTOR's Global Plants database  
231 (<http://plants.jstor.org>).



232 For the discrete data, we used maximum likelihood to define the best model fitting our data  
233 using the function ‘ace’ implemented in the R package ape v5. 3 (Paradis et al., 2004). We  
234 tested “ER” (Equal Rates) and “ARD” (All Rates Different) on our data, and the best model was  
235 selected based on the Akaike Information Criterion (AIC) (Akaike, 1974). We used the Akaike  
236 weight using `aic.w` function in the R package `geiger` v2.0.6 to select the best model for those  
237 data with low delta AIC between ER and ARD models. To reconstruct ancestral states, we used  
238 stochastic character mapping with 1000 iterations using the `make.simmap` function in the  
239 `phytools` v0.7.78 package (Revell, 2012). We also reconstructed the ancestral state of corolla  
240 length using the `lik.anc` in `phytools` to calculate the likelihood of each ancestral state.  
241 Ancestral states of corolla length and 95% confidence intervals were evaluated using the  
242 function `anc.ML` with an OU (Ornstein-Unlenbeck) model in `phytools`.

## 243 **2.6. Macroevolutionary patterns within corolla length**

244 We focused on corolla length as one of the most important morphological traits that might  
245 influence pollinator-flower interactions (Fernández- Mazuecos et al., 2013; Gómez et al.,  
246 2016; Landis et al., 2018). To investigate the evolutionary dynamics of corolla length  
247 throughout *Salvia* phylogeny, we applied three quantitative approaches based on the time-  
248 calibrated phylogeny as follows:

249

### 250 **2.6.1. Diversification model**

251 We examined three evolutionary models with different patterns of phenotypic evolution  
252 using the R package `geiger` v2.0.6 (Harmon et al., 2008) following three different models. 1)  
253 The Brownian Motion model (BM): This model describes a “random walk” of evolution for  
254 continuous characters. 2) The Ornstein-Uhlenbeck model (OU): This model describes the local  
255 occurrence of stabilizing selection in which the trait is drawn toward optimal fitness (Hansen  
256 1997). 3) The Early Burst model (EB): This model is known as a classic model of adaptive  
257 radiation, in which the initial stage of morphological evolution is rapid with decreasing  
258 morphological evolution after ecological spaces are filled (Harmon et al., 2010). Based on a  
259 recent model of diversification reconstructed by Aguilée et al. (2018), after an initial phase of  
260 geographic adaptive radiation, diversification rates can be affected not only by ecological  
261 niches, but also by genetic processes, competition, and landscape dynamics. The best model  
262 for explaining diversification of *Salvia* was selected based on the AIC (Akaike, 1974).

263

### 264 2.6.2. Disparity Through Time

265 Disparity Through Time (DTT) of the corolla length was modeled using the R package *geiger*  
266 v2.0.6 (Harmon et al., 2008). This analysis uses corolla length of extant *Salvia* species to  
267 reconstruct ancestral corolla length values and model disparity between species. This  
268 approach estimates the pairwise Euclidean distance of the trait over time and compares it  
269 with the expected value under a null model of Brownian motion by iterative simulation.  
270 Phenotypic disparity refers to the phenotypic variation among related species (Harmon,  
271 2003). We simulated corolla length evolution with 10,000 generations across the  
272 phylogenetic tree built from the combined data set of plastid and nuclear sequences. The  
273 Morphological Disparity Index (MDI) was calculated, and the average disparity of corolla  
274 length from the real and simulated data was plotted. Negative MDI shows lower disparity of  
275 the trait than expected, and positive MDI indicates strong overlap in morphospace and  
276 higher disparity within subclades (Donoso et al., 2015).

277

### 278 2.6.3. Diversification rate

279 To assess variation in rates of diversification of corolla length across *Salvia*, we used the  
280 phenotypic trait module in BAMM. We simulated 20,000,000 generations, and the priors  
281 were set using the function “SetBAMMpriors” in the R package BAMMTools v.2.1.6 (Rabosky  
282 et al., 2014). We specified the sampling fraction by accounting for the number of samples for  
283 each of the four major clades. Sampling fractions were set as: 0.47 (clade I), 0.26 (clade II),  
284 0.95 (clade III) and 0.56 (clade IV). We performed MCMC simulation with 20,000,000  
285 generations by sampling every 1000 generations. We discarded the first 25% of runs as burn-  
286 in. Effective Sample Size (ESS) > 200 was used to evaluate the convergence of four Markov  
287 Chain Monte Carlo chains. The BAMM output was analyzed using BAMMtools.

288

## 289 **2.8. Lever-mechanism-dependent diversification**

290 To examine whether the diversification rate in *Salvia* is correlated with the presence of the  
291 lever mechanism, we applied HiSSE (Hidden State Speciation and Extinction) implemented in  
292 the R package *hisse* v2.1.1 (Beaulieu and O’Meara 2016), which is a modified method of BiSSE

293 (Binary State Speciation and extinction) (Maddison et al., 2014). Rabosky (2014) argued that  
294 the BiSSE method suffers from type I and type II errors. In those cases, traits that are not  
295 biologically correlated with speciation rates show significant effects on diversification  
296 (Goldberg and Rabosky, 2015). In other words, rejecting the null hypothesis in BiSSE does not  
297 mean the alternative is true.

298 Compared with the BiSSE model, the HiSSE model considers more free parameters and  
299 assumes a hidden state for each of the observed states that potentially have independent  
300 rates of diversification (OA, 1A, OB, 1B). The Character Independent Diversification (CID)  
301 models, which assume independent evolution for binary characters, were also implemented.  
302 The CID models explicitly test that the evolution of a binary character is independent of the  
303 diversification process without forcing the diversification process to be constant. Different  
304 subsets of the HiSSE model that differ in speciation, extinction, and transition rate  
305 parameters, along with standard BiSSE models, were estimated (cf. Harrington and Reeder,  
306 2017). We accounted for incomplete taxon sampling in our phylogeny by assigning the  
307 sampling frequency of each state as 0.256 (presence of the lever mechanism) and 0.056  
308 (absence of the lever mechanism). The model average of ancestral state and diversification  
309 of all fitted models was plotted using the function “plot.hisse.state”. The advantage of this  
310 function is that it accounts for both state and rate uncertainty of the models along plotted  
311 branches. We also used FiSSE (Fast intuitive State-dependent Speciation Extinction) as a non-  
312 parametric test for the lever-mechanism-dependent speciation rate. This method does not  
313 depend on the character state, but considers the distribution of branch lengths (Rabosky and  
314 Goldberg 2017).

315

## 316 **2.9. Diversity-dependent diversification**

317 We also used the R package DDD v2.7 (Etienne and Haegman, 2012) to test whether  
318 diversification in *Salvia* is dependent or independent of diversity. DDD uses a hidden Markov  
319 model to calculate the likelihood of phylogenetic history under a diversity-dependent birth-  
320 death model of diversification. DDD estimates “ $K$ ”, the maximum number of species that a  
321 clade can have in a given environment; a value of  $K$  near the number of extant species  
322 suggests that a clade is close to its ecological limit. The other two models are a density-  
323 dependent logistic (DDL+E) model and a density-dependent exponential (DDE+E) model. The  
324 model with the lowest AICc was selected as the best model. We also calculated the maximum

325 likelihood evolutionary history pattern with both a Yule model and a constant rate birth-death  
326 (CrBD) model. The Maximum Clade Credibility (MCC) of the BEAST output was used to  
327 perform this analysis. We also examined four model fits as an alternative method using the R  
328 package *laser* v2. 4 (Rabosky 2006).

329

### 330 **3. Results**

#### 331 **3.1. Characteristics of the phylogenetic data matrix and phylogenetic analysis**

332 In this study, 143 new DNA sequences were generated for 50 Iranian *Salvia* species, including  
333 50 species (59 accessions) for the ETS region, 46 species (47 accessions) for ITS, and 34 species  
334 for *ycf1*.

335 Maximum likelihood analyses of all three data combinations were conducted: 1) plastid loci  
336 (*rpl32-trnI*, *trnI-trnF*, and *ycf1-rps15*), 2) nuclear loci (ITS and ETS), and 3) a combined data set  
337 of plastid and nuclear loci. The overall topologies of the nuclear loci, plastid loci, and the  
338 combined data set are similar in recovering major clades. Based on both nuclear and plastid  
339 regions, the phylogenetic relationships among most of the Eurasian species in clade I are  
340 unresolved. This result is not surprising given that we had more missing data in the plastid  
341 partition than other partitions. The nuclear and combined data sets provide higher support  
342 for most of the clades than plastid data. For example, clade III was recovered as fully resolved  
343 based on nuclear regions and combined data, but based on plastid data, the relationship  
344 between *S. majdae* and *S. macilenta* with the remain group in clade III was unresolved. Trees  
345 based on the nuclear and combined data sets were highly similar, with only some minor  
346 differences in support values for terminal clades. However, the combined data recovered a  
347 more resolved phylogeny. For example, in clade I within Subgen. *Heterosphace*, the  
348 relationship between the *S. verticillata* group with the remaining taxa was resolved based on  
349 the combined data but not the nuclear data. As a result, we used the results from the  
350 combined data set in subsequent analyses and in our discussion below.

351 We recovered four major clades of *Salvia* species: clade I (Eurasian and southern African  
352 *Salvia*), clade II (South and North American *Salvia*), clade III (southwestern Asian and northern  
353 African *Salvia*), and clade IV (Southeast Asian *Salvia*). With more taxon sampling, we provide  
354 a new phylogeny for clade III with species that are primarily distributed in southwestern Asia.  
355 However, we mostly focus here on newly recovered relationships for Iranian species of *Salvia*

356 and the clades to which they belong rather than on *Salvia* phylogeny as a whole. For more  
357 straightforward comparisons, we also used both clade names provided in previous  
358 phylogenetic studies of *Salvia* (Will and Claßen-Bockhoff, 2017) along with the recent  
359 classification (Drew et al., 2017; Kriebel et al., 2019) in **Suppl. 1**.

#### 360 Clade I

361 In this clade, species are mainly distributed in Europe, Central Asia, western Asia, and  
362 southern Africa. This clade contains 140 species (170 accessions) out of the 250-300 species  
363 described for these areas. They fall into four distinct subclades (subclades I-A, I-B, I-C, and I-  
364 D) of Will and Claßen-Bockhoff (2017) including subgenera *Salvia* Benth., *Sclarea* Benth., and  
365 *Heterosphace* Benth (Kriebel et al., 2019). For the first time, resolution within the *S*.  
366 *verticillata* group was obtained. *Salvia taraxacifolia* was recovered as the sister to the *S*.  
367 *verticillata* group (BS = 81%) consisting of *S. verticillata*, *S. judaica*, and *S. russellii*. This clade  
368 was in turn sister (BS = 95%) to the southern African clade.

369 Subclade I-C and I-D: 26 species of Iranian *Salvia* sampled here were recovered as members  
370 of subclades I-C, and six species were placed in subclade I-D, including subgen. *Sclarea* and  
371 *Salvia* based on the updated subgeneric classification of *Salvia* (Will and Claßen-Bockhoff  
372 2017; Drew et al., 2017; Kriebel et al., 2019). These subclades include *Salvia* distributed in  
373 western Asia (Afghanistan, Iran, Iraq, and Turkey), Central Asia, Europe, and the Canary  
374 Islands. Based on the combined data set of nuclear and plastid loci, the phylogenetic  
375 relationships among most of the taxa were unresolved. However, several groups were  
376 identified within this polytomy: 1) *S. jamzadaei*, *S. macrochlamys*, *S. bracteata*, and allied  
377 species; 2) two species endemic to Iran (*S. leriifolia* and *S. hypochionaea*) along with *S*.  
378 *montbretia*, *S. daghestanica*, and *S. phlomoides*; 3) *S. spinosa*, *S. sclareopsis*, *S. macrosiphon*,  
379 *S. reuterana*, *S. perspolitiana*, and *S. palaestina* (a clade with BS = 60%); and 4) *S. nemorosa*  
380 and *S. virgata* from southwestern Asia, the Caucasus, and Europe along with *S. deserta* and  
381 *Salvia* × *sylvestris*.

#### 382 Clade II

383 *Salvia* species in this clade are endemic to South and North America, and clade II includes  
384 more than half of all *Salvia* species, with approximately 600 species in subg. *Calosphace* and

385 19 species in subg. *Audibertia*. Clade II is recovered with BS= 97%; however, relationships  
386 among taxa in this clade are not fully resolved. Clade I is sister to clade II with BS= 74%.

387 Clade III

388 This clade contains species of *Salvia* from northern Africa and southwestern Asia. We provide  
389 the most comprehensive taxon sampling for clade III to date by generating 13 new sequences  
390 for members of this group from the region of Iran. Clade III was recovered with 100% BS  
391 support with a well-resolved phylogeny in trees from nuclear and combined data. Based on  
392 the combined nuclear and plastid tree, *S. majdae*, which was placed in subgen. *Zhumeria*  
393 (Drew et al., 2017), was found instead to be sister with high support (BS = 97%) to the *S.*  
394 *aristata* group, which includes *S. pterocalyx* (from northeastern Afghanistan) and *S. vvedenskii*  
395 and *S. margaritae* (from Central Asia). *Salvia majdae* and the *S. aristata* group were placed as  
396 the sister clade to a trichomy of *S. aegyptiaca*, *S. macilenta*, and *S. eremophila*.

397 Clade IV

398 *Salvia* species in this clade are restricted to eastern Asia, with the exception of *S. glutinosa*  
399 and *S. plebeia*. We provide new sequence data for *S. glutinosa*, which is distributed in the  
400 northern part of Iran and some parts of Europe. *Salvia plebeia* is reported from Iran and  
401 Afghanistan and extends to Southeast Asia. Based on our results, *S. glutinosa* forms a clade  
402 with *S. nubicola*, *S. koyamae*, *S. glabrescense*, and *S. nipponica* with BS = 88%.

403

### 404 **3.2. Divergence times**

405 Divergence times were estimated using the combined data set of nuclear and plastid loci. The  
406 results are congruent with previous results (Drew et al., 2017; Kriebel et al., 2019). Our BEAST  
407 analysis (**Fig. 3**) suggests that *Salvia* originated in the Oligocene ~34 Ma. Divergence time  
408 estimation showed that the split between clade I and the rest of *Salvia* occurred  
409 approximately 31 Ma (95% HPD = 37.6-27.5 Ma). In clade I, the North American clade diverged  
410 from the African and Mediterranean clade approximately 15 Ma (95% HPD = 20.06-10.69)  
411 during the middle Miocene. The age of the MRCA of most of the Iranian *Salvia* species in clade  
412 I was estimated as 14.3 Ma (95%HPD = 18.74-10.47 Ma) near the end of the early Miocene.  
413 Clade II diverged from clade III (mostly from southwestern Asia) in the early Miocene (95%

414 HPD = 27.8-17.8 Ma). The split between clade IV (eastern Asia) and clade III (southwestern  
415 Asia and northern Africa) is estimated to have occurred during the late Oligocene (95%HPD =  
416 31.5-20.26 Ma).

### 417 **3.3. Ancestral character reconstruction**

418 Corolla length varies from 4 mm in *S. aegyptiaca* in clade III to 51 mm in *S. patens* in clade II.  
419 The most recent common ancestor for *Salvia* was reconstructed as having a corolla length of  
420 approximately 15-18 mm (**Fig. 4**). Corolla length of ~20 mm was inferred as the ancestral state  
421 for clade I. In clade I, within subg. *Sclarea*, multiple shifts from a corolla length of 20 mm to  
422 smaller corollas occurred, but in subg. *Salvia*, all the species evolved corolla lengths longer  
423 than 20 mm. In subg. *Heterosphace*, including bird-pollinated species of *Salvia* from southern  
424 Africa (*S. africana-lutea*, *S. lanceolata*, *S. thermarum*), the corolla length is more variable,  
425 ranging from ~7-41 mm. In clade II, shifts in the range of corolla size were much higher than  
426 in other clades, especially in subg. *Calosphace*. In clade III, the ancestral state of corolla length  
427 was recovered as ~15 mm. Within this clade, species of *Salvia* have small flowers (4-9 mm)  
428 with shifts to larger flowers in subg. *Zhumeria* and the *S. aristata* group.

429 The ER model was selected as the best model for the evolution of the lever mechanism based  
430 on the AIC value. However, the difference between the ER (Equal Rates) and the ARD (All  
431 Rates Different) model was minimal (ER 168.46 vs. ARD 169.68). The Akaike weight for the ER  
432 model (0.65) was higher than for the ARD model (0.32). Therefore, we reconstructed the  
433 ancestral state of the lever mechanism based on the ER model. The ancestral state of the  
434 lever mechanism for *Salvia* was equivocal (**Fig. 5**). In clade I, the ancestral state of the lever  
435 mechanism was also equivocal, but the ancestral state of subg. *Salvia*, *Sclarea*, and  
436 *Heterosphace* is an active lever mechanism. In clade II, the ancestral state is equivocal with  
437 several shifts in subg. *Calosphace* from an active lever to a non-active lever. In clade III, *Salvia*  
438 species lack an active lever mechanism, and the ancestral state for the clade is equivocal.

439 The ARD model was moderately suggested as the best model (Delta AIC = 3.345) for inferring  
440 the ancestral state of habit across the *Salvia* phylogeny. The ancestral state of habit for all of  
441 *Salvia*, as well as major subclades, was found here to be equivocal (**Fig. 6**). In clade I, species  
442 of subgen. *Sclarea* are mostly herbs with a few shifts to shrub forms, but subgen. *Salvia* and

443 *Heterosphace* are mostly shrubs with several shifts to herbaceousness. In clade II, especially  
444 in subgen. *Calosphace*, shifting from herb to shrub was more frequent than in other clades.

445

### 446 **3.4. Tempo and mode of corolla length evolution**

447 The analysis of disparity through time showed that the rates of diversification in corolla length  
448 among subclades of *Salvia* are higher than expected under a null hypothesis of Brownian  
449 motion (MDI = +0.21). Therefore, *Salvia* subclades have diversified greatly in corolla length.  
450 The corolla length decreased during the Miocene between approximately 17-15 Ma (within  
451 the 95% CI calculated from simulations of corolla length disparity), but showed a remarkable  
452 increase during the last ~10 Ma, during which the relative disparity of corolla length is higher  
453 than the 95% DTT range of simulated data (**Fig. 7**).

454 The model-based analysis of corolla length diversification determined "OU" as the best  
455 approximation model of this trait across *Salvia* phylogeny. Hence, our results suggest that  
456 corolla length evolution underwent stabilizing selection towards a median value (**Table 2**).

#### 457 **3.4.1. Corolla length evolutionary rates**

458 To assess whether the MCMC output of the BAMM analysis for corolla length has converged,  
459 we checked the effective sample sizes of the log-likelihood and the number of shift events.  
460 Based on  $ESS_{\text{Number of shifts}} = 1139.461$  and  $ESS_{\text{Loglike}} = 1458.028$ , the MCMC simulation  
461 converged. The phylorate plot confirmed heterogeneous rates of evolution of corolla length  
462 in *Salvia*. The best distinct shift configuration with the highest posterior probability was  
463 detected at the MRCA of core *Calosphace* in clade II (**Fig. 8**).

464

### 465 **3.5. Diversity-dependent diversification**

466 The maximum likelihood analysis of lineage diversification showed that among four fitted  
467 models, with two models dependent on diversity, the Yule model was selected as the best  
468 model based on AIC values for explaining *Salvia* diversification through time. Hence, the  
469 evolutionary pattern of *Salvia* diversification is independent of diversity (**Table 3**). The  
470 estimated carrying capacity ( $K > 3000$ ), which refers to the potential number of species that a



471 clade can sustain, is higher than the number of extant species of *Salvia* (~1000). Rejection of  
472 the diversity-dependent diversification model implies that *Salvia* has not reached its  
473 ecological limit in terms of number of species and that speciation has not yet started to  
474 decline due to increased species competition or fewer ecological resources.

475

### 476 **3.6. Lever-mechanism-dependent diversification**

477 We used HiSSE (Beaulieu and O'Meara, 2016) and FiSSE (Rabosky and Goldbeg., 2017)  
478 methods for analyzing the effect of the active lever mechanism on diversification. We found  
479 that the HiSSE model with an equal irreversible transition rate among states ( $q_{0B1B}=0$ ,  
480  $q_{1B0B}=0$ , all other  $q$ 's equal) is the best model for explaining the effect of the lever  
481 mechanism on *Salvia* diversification. Better performance of the HiSSE model than the BiSSE  
482 model indicates a signal of lever-mechanism-dependent diversification as well as a signal of  
483 other unobserved or unmeasured traits. Therefore, we infer that the lever mechanism is  
484 indirectly responsible for *Salvia* diversification (**Table 4**). Based on FiSSE two-tailed  
485 parameters, the P-value = 0.69; therefore, the null hypothesis of a close association between  
486 the lever mechanism and *Salvia* diversification is rejected. The average tip rate of  
487 diversification for an active lever mechanism is  $\lambda_1 = 0.26$  and for a non-active lever mechanism  
488 is  $\lambda_0 = 0.22$ .

489

## 490 **4. Discussion**

### 491 **4.1. Phylogeny**

492 By including 50 species of *Salvia* from the Iran region, the limited taxon sampling for the  
493 Eastern Hemisphere encountered in previous studies (Drew and Sytsma, 2012; Will and  
494 Claßen-Bockhoff, 2014, 2017; Drew et al., 2017) was remedied to some extent. To reconstruct  
495 the phylogenetic tree of *Salvia* as comprehensively as possible, our newly generated data  
496 were combined with relevant sequences from previous studies (Walker and Sytsma, 2007;  
497 Drew and Sytsma, 2012; Takano and Okado 2011; Will and Claßen-Bockhoff, 2014; Fragoso-  
498 Martineze, 2017).

499 Our results for *Salvia* as a whole are similar to those reported in previous phylogenetic results  
500 in recovering four major well-supported clades comprising six subgenera were recovered for  
501 *Salvia* (Will and Claßen-Bockhoff 2017; Drew et al., 2017; Kriebel et al., 2019). The resultant  
502 trees for all the data sets largely agree with each other. Nevertheless, some discrepancies in  
503 phylogenetic relationships within subclades were observed. In the paragraphs that follow, we  
504 summarize and discuss the major phylogenetic results of this study and also compare our  
505 findings to other studies of *Salvia*.

#### 506 Clade I

507 This clade includes species from three subgenera, *Heterosphace*, *Salvia*, and *Sclarea* (Drew et  
508 al., 2017; Kriebel et al., 2019). *Salvia* species in this clade are distributed in small areas of  
509 North America, southern Africa and Madagascar, western Asia, Europe, and the Canary  
510 Islands. Although the phylogenetic relationships among most of the taxa in clade I are still not  
511 well resolved, our use of more nuclear and plastid regions was helpful in recovering the  
512 African clade with higher bootstrap support than previously reported (Will and Claßen-  
513 Bockhoff, 2017).

#### 514 Subgen. *Heterosphace*

515 This group comprises three supported subclades (supplementary 1). 1) Subclade I-A includes  
516 species from both northern and southern Africa. *Salvia nilotica* and *S. somalensis*, two species  
517 distributed in Tanzania and Ethiopia, respectively, were recovered as successive sisters to the  
518 southern African clade. 2) Subclade I-B comprises several species of *Salvia* from North  
519 America, formerly classified in section *Salviastrum* Scheele. Kriebel et al. (2019) argued that  
520 dispersal to eastern North America (sect. *Salviastrum* of subgen. “*Heterosphace*”) from the  
521 Eastern Hemisphere lineage occurred during the mid-Miocene. 3) The *S. verticillata* group:  
522 *Salvia taraxacifolia* was recovered as sister to the *S. verticillata* group (BS = 81%) consisting of  
523 *S. verticillata*, *S. judaica*, and *S. russellii*. The latter clade was sister (BS = 95%) to the southern  
524 African clade. Previous studies (Will and Claßen-Bockhoff, 2014; Will and Claßen-Bockhoff,  
525 2017) failed to resolve the phylogenetic position of *S. taraxacifolia* (Mediterranean element)  
526 or with low support (Kriebel et al., 2019) within the *S. verticillata* group. Our results from the  
527 combined nuclear and plastid data recovered *S. taraxacifolia* as sister to the *S. verticillata*  
528 group with high support. *S. nilotica* placed as sister to the southern African clade species.

529 Most of the *Salvia* species in clade I (Europe, Madagascar, Central Asia), along with Iranian  
530 species of *Salvia*, are placed in subclades I-C and I-D and are classified as subgen. *Sclarea* and  
531 *Salvia* following recent treatments (Drew et al., 2017; Kriebel et al., 2019). Although  
532 phylogenetic relationships among species of *Salvia* in these subclades are mostly unresolved,  
533 our increased taxon sampling was helpful in determining the phylogenetic position of Iranian  
534 *Salvia* species and provides evolutionary insights and rationale for improving the taxonomy  
535 of *Salvia*.

#### 536 Clade II

537 As noted above, clade II comprises species from North and South America, within which  
538 approximately half of all *Salvia* species are distributed. Because relationships among species  
539 from this geographic region were not the focus of this study, our sampling from this region is  
540 more limited than from central and western Asia, Europe, and Africa. Relationships are  
541 therefore largely unresolved. For more detail about relationships among species of *Salvia*  
542 from the Americas, we refer the reader to (Walker et al., 2015; Fragoso-Martínez 2018; Kriebel  
543 et al., 2019)

#### 544 Clade III

545 Clade III encompasses species distributed in northern Africa and southwestern Asia. Within  
546 this clade, species are mostly dwarf shrubs with smaller flowers than those of other *Salvia*  
547 clades. In the Iran flora, most species are distributed in the southern region of Iran (25-27 N°).  
548 We present here the best-resolved phylogeny obtained for clade III with the most  
549 comprehensive taxon sampling to date; our nuclear data set fully resolved relationships with  
550 BS = 100%. *Salvia majdae*, formerly classified as the monotypic genus *Zhumeria*, is an endemic  
551 aromatic shrub in southern Iran. Based on a recent study (Soltanipour et al., 2020), *S. majdae*  
552 is reported as an endangered species on the IUCN Red List based on Extent of Occurrence  
553 (EO) and Area Of Occupancy (AOO). *Salvia aristata* is another endemic species of Iran in this  
554 clade placed as the sister species of *S. majdae*. This species has a different habit (herbaceous  
555 perennial) from the remaining species in clade III, as well as a larger distribution in Iran.

#### 556 Clade IV

557 Clade IV is restricted to eastern Asia. Notably, *S. glutinosa*, which is distributed in northern  
558 Iran and western Europe, forms a clade with species from eastern Asia. *Salvia glutinosa* also  
559 shares similar traits with *S. nubicola* in corolla color (yellow with brown-purple spots on the  
560 lower lip) and with a clade of *S. koyamae*, *S. glabrescense*, and *S. nipponica* in leaf form and  
561 flower shape (Hu et al., 2018). Thus, *S. glutinosa* may have historically had a larger distribution  
562 than currently displayed. It is likely that *S. glutinosa* is a relict Arcto-Tertiary element and  
563 that the Euxine-Hyrcanian province (western Europe, northern Iran) was a refugium for this  
564 species (Browicz 1987, Akhiani et al., 2010). Ecological niche modeling projecting into the past  
565 may enable a more complete view of the past distribution of *S. glutinosa*. A more detailed  
566 view of the phylogeny of *Salvia* from eastern Asia is found in (Hu et al., 2018; Hu et al., 2020xx).

#### 567 **4.2. Divergence times**

568 Our estimate for the date of origin of *Salvia* (31 Ma, 95% HPD = 37.6-27.5 Ma) is consistent  
569 with previous studies (Drew et al., 2012; Drew et al., 2017), which is not surprising given that  
570 the calibration used here was based on Drew et al. (2012) from analysis on a larger taxonomic  
571 scale of Nepethoideae based on a fossil fruit of *Melissa* from the Early-Middle Oligocene.

572 The Qinghai-Tibetan Plateau (QTP) underwent four periods of uplift: 25-17 Ma, 15-13 Ma, 8-  
573 7 Ma, and 3.5-1.6 Ma. The major radiation for *Salvia* in eastern Asia in clade IV is estimated  
574 at 8-10 Ma, which coincides with the QTP uplift in the late Miocene. Our estimate for the  
575 crown age of eastern Asian *Salvia* (~12 Ma) is consistent with that of Drew et al. (2017), but  
576 is younger than that reported in another recent study (Hu et al., 2018) on eastern Asian *Salvia*  
577 with an estimated date of ~17 Ma. This inconsistency might be because of different taxon  
578 sampling, placement of calibrations, or prior distribution of the calibration node among the  
579 studies. Our data suggest that the QTP uplift played an important role in local diversification  
580 of *Salvia*, as it has for other plant genera in eastern Asia (Yao et al., 2016; Malik et al., 2017;  
581 Hu et al., 2018).

582 The Arabia-Eurasian collision in the Oligocene-early Miocene led to the emergence of the  
583 Alborz and Zagros Mountains in the Middle Miocene (15-12 Ma) in the Iranian plateau  
584 (Manafzadeh et al., 2016). The main stage of crustal thickening from the collision was ~25 Ma,  
585 and the uplift of the Iranian plateau took place ~15-12 Ma, with further uplift ~5 Ma (Djamali  
586 et al., 2012; Manafzadeh et al., 2016). The emergence of these mountains coincides with the

587 age of the MRCA of Iranian *Salvia* species. Formation and uplift of mountains can play an  
588 important role in evolutionary diversification through providing heterogeneous niches and  
589 landscapes. Therefore, we postulate that the emergence and uplift of the Iranian Mountains  
590 during the last ~12 Ma, along with subsequent aridification (Manafzadeh et al., 2016; Folk et  
591 al., 2020), provided new ecological opportunities and habitat for *Salvia* diversification in Iran.

592

### 593 **4.3. Ancestral state reconstruction**

#### 594 4.3.1. Corolla length

595 Across *Salvia* phylogeny, there were multiple shifts from a corolla length longer than 25 mm  
596 to shorter corollas within and among clades. The MRCA of subg. *Calosphace* had a corolla  
597 length less than 25 mm, but multiple shifts from short (~4 mm) to long (~45 mm) corollas  
598 occurred in subclades of *Calosphace*. Based on the current study and previous reports (Wester  
599 and Claßen-Bockhoff, 2011; Wester et al., 2020), most *Salvia* species with an average corolla  
600 length of  $22.3 \pm 6.5$  mm are visited by bees, while bird pollinators are more attracted to flowers  
601 with an average corolla length of  $31 \pm 9.5$  mm. Floral construction is associated with the type  
602 of pollinators in *Salvia* (Wester et al., 2020), and an overall correlation between flower size  
603 and pollinator is not expected across all *Salvia* lineages. For instance, *S. blepharochlaena*,  
604 which is distributed in Turkey, is melittophilous, but has a long corolla. *Salvia purpurea* in  
605 subgen. *Audibertia* has an intermediate flower (pollinated by bees and hummingbirds); *S.*  
606 *purpurea* has a long corolla (19-36 mm) and long flower tube that is characteristic of  
607 hummingbird-pollinated *Salvia* species, but the flower has the wide landing platform of a bee-  
608 pollinated flower (Wester and Claßen-Bockhoff, 2011). Special flower traits like a short flower  
609 tube cause a phenotypic trade-off and adaptation to birds and bees, but if a short tube is  
610 combined with a narrow corolla opening, this combination of floral traits can generalize to  
611 both pollinators (Ohashi et al., 2021). We do not imply that corolla length is the only trait  
612 involved in *Salvia*–pollinator interactions; other factors, such as flower shape, tube length,  
613 and color, may also be involved in pollinator attraction and adaptation (Landis et al., 2018;  
614 Wessinger et al., 2019; Kriebel et al., 2020).

#### 615 4.3.2. Lever mechanism

616 *Salvia* species with an active lever mechanism are characterized by modified stamens. The  
617 lever is formed by elongation of the connective tissue that widens and separates the two  
618 thecae from each other. Levers have evolved several times in parallel both within and  
619 between clades I and II (Drew and Sytsma, 2012). In this study, we inferred the ancestral state  
620 based on two models considering different rates of evolution. Based on the ER model (Equal  
621 Rates), the ancestral state for *Salvia* is equivocal, and two alternative hypotheses may explain  
622 the distribution of the lever mechanism across *Salvia*. First, the MRCA of *Salvia* may have had  
623 a non-active lever mechanism, and a lever evolved independently multiple times in separate  
624 lineages. Alternatively, the ancestor of *Salvia* may have had an active lever mechanism, and  
625 several losses and reversals took place throughout the clade. Additionally, the HiSSE analysis,  
626 with the preference of the irreversible model for lever mechanism diversification, suggests  
627 that changes from non-active to active lever is not plausible or at the very least evolutionarily  
628 difficult. Therefore, we argue that a *Salvia* ancestor with an active lever is more probable than  
629 a non-active lever.

#### 630 4.3.3. Habit

631 The ancestral habit in *Salvia* is reconstructed here as equivocal. Several shifts from woody to  
632 herbaceous occurred within the main clades. This ambiguity might be due to diverse clades  
633 that transition frequently between woody and herbaceous, making it difficult to infer the  
634 state of the MRCA of *Salvia*.

### 635 **4.4. Corolla length evolution**

#### 636 4.4.1. Disparity Through Time

637 The value obtained (MDI = 0.21) for the disparity of corolla length reflects a high rate of  
638 diversification and morphological lability in related species. The positive MDI value for  
639 disparity shows that most of the variation in corolla size is within subclades, while a negative  
640 MDI indicates higher disparity among subclades, which is traditionally interpreted as adaptive  
641 radiation (Harmon et al., 2010). Increasing disparity in corolla length during the last 10 M  
642 years of *Salvia* evolution coincides with a number of geological events, including the Andean  
643 uplift, Mexican vulcanization (clade II), the uplift of the QTP (clade IV), and the uplift of the  
644 Zagros Mountains (occupied by species in clade I; Ferrari et al., 2012; Yao et al., 2016;

645 Manafzadeh et al., 2016), all major geological events that may have profoundly shaped *Salvia*  
646 evolution worldwide.

647 Our positive value of MDI and support for the OU model contrast with traditional  
648 interpretations of adaptive radiation in which MDI is negative through phenotypic  
649 diversification with the Early Burst (EB) model of diversification (Harmon et al., 2010). In  
650 addition, the DDD analyses do not support density-independent lineage diversification, and  
651 the Yule model was selected as the best model with no apparent slowdown in *Salvia*  
652 diversification. In the classic definition of adaptive radiation, the rate of diversification first  
653 increases due to access to new niche space, followed by slow diversification as niche space  
654 fills (Rabosky, 2013; Gillespie et al., 2020). However, Augilee et al. (2018) argued that  
655 ecological niche filling as an explanation for negative-dependent diversity should be treated  
656 with caution because biotic (competition) and abiotic factors (landscape dynamics) can  
657 correspond to species diversity in different stages of a clade's history.

#### 658 4.4.2. Corolla length diversification

659 Floral traits have played a key role in enhancing angiosperm diversification (e.g., Stebbins,  
660 1970; Fenster et al., 2014; Armbruster, 2014; Van der Neit and Johnson, 2014), and some  
661 floral characters (corolla length, corolla tube length, corolla shape, and flower color) are  
662 associated with pollinator interactions. The positive effects of certain floral traits on the  
663 effectiveness of one group of pollinators relative to others occurs most often in bilaterally  
664 symmetrical flowers (Ollerton, 2009; Armbruster, 2014; Wester et al., 2020). The rate of  
665 evolution of corolla length in one clade of *Calosphace* (clade II) was significantly higher than  
666 in other clades. Detection of correlated rate shifts in this clade implies that changes in corolla  
667 length may have enabled an adaptive radiation in this clade. Species in this clade are mostly  
668 distributed in South and Central America, including Bolivia, Mexico, Peru, and Argentina, and  
669 include hummingbird-pollinated species with several shifts to bee pollination (Fragoso-  
670 Martinez et al., 2017; Kriebel et al., 2019). Therefore, corolla size may be a putatively adaptive  
671 trait that facilitated pollinator-flower interactions in this clade.

#### 672 **4.5. Lever-mechanism-dependent diversification**

673 The special lever-mechanism pollination system in *Salvia* has been hypothesized to have  
674 played a major role in *Salvia* diversification (Claßen-Bockhoff et al., 2004; Drew and Sytsma,

675 2012). The functionality and structure of the lever mechanism were tested through field  
676 investigation and biomechanical experiments (Claßen-Bockhoff et al., 2004; Wester and  
677 Claßen-Bockhoff, 2004; Reith et al., 2007; Drew and Sytsma, 2012; Zheng et al., 2015).  
678 However, the actual effect of the lever mechanism on diversification has not been previously  
679 investigated. We examined this hypothesis across our phylogeny using a Hidden Markov  
680 Model implemented in the HiSSE package. The best model fitted was the HiSSE model with  
681 irreversible transitions among states. The lever mechanism likely has an important impact on  
682 pollination success (Classen-Bockhoff et al., 2004; Zheng et al., 2015; Kriebel et al., 2019) and  
683 may have influenced diversification, but we did not find any evidence for a direct association  
684 of lever mechanism with *Salvia* diversification. Characters not measured here, including  
685 flower shape features that are associated with the observed state, were likely influential as  
686 well (Kriebel et al., 2020). Based on the HiSSE analysis, we suggest that emphasis on the lever  
687 mechanism alone as the key promotor of diversification in *Salvia* may be misplaced and that  
688 other phenotypic characters, especially other floral traits, should also be considered and  
689 examined across the phylogeny. We should take into account that there might be  
690 shortcomings and insufficient information in macroevolutionary models and that trees for  
691 extant species may not permit the precise reconstruction of historical diversification (Louca  
692 and Pennell, 2020). However, Helmsetter et al. (2021) argue that recent more complex  
693 models can provide additional information and overcome the problems of relying on time  
694 trees for extant species. An important issue for future studies in understanding *Salvia*  
695 evolutionary history is assessing the effect of other floral traits on diversification via the  
696 reconstruction of more robust phylogenetic trees using more genes and species.

## 697 **Acknowledgement**

698 We are thankful to Matthew Gitzendanner and Evgeny Mavrodiev, Florida Museum of  
699 Natural History, for help with analyses and general lab assistance.

## 700 **References**

- 701 Aguilée, R., Gascuel, F., & Lambert, A. (2018). abiotic controls of speciation and extinction  
702 rates. *Nature Communications*, 1–13. <https://doi.org/10.1038/s41467-018-05419-7>.
- 703 Akaike, H. 1974. A new look at the statistical model identification. *IEEE Trans. Autom. Control*  
704 19:716–723.



- 705 Akhani, H., Djamali, M., Ghorbanalizadeh, A., & And, E. R. (2010). Plant biodiversity of  
706 Hyrcanian relict forests, N Iran: An overview of the flora, vegetation, palaeoecology and  
707 conservation. *Pakistan Journal of Botany*, 42: 231–258.
- 708 Alfaro, M.E., Brock, C.D., Banbury, B.L. et al. Does evolutionary innovation in pharyngeal  
709 jaws lead to rapid lineage diversification in labrid fishes?. *BMC Evol Biol* 9, 255 (2009).  
710 <https://doi.org/10.1186/1471-2148-9-255>
- 711 Armbruster, W. S. (2014). Floral specialization and angiosperm diversity: Phenotypic  
712 divergence, fitness trade-offs and realized pollination accuracy. *AoB PLANTS*, 6, 1–24.  
713 <https://doi.org/10.1093/aobpla/plu003>
- 714 Beaulieu, J. M., & O’Meara, B. C. (2016). Detecting hidden diversification shifts in models of  
715 trait-dependent speciation and extinction. *Systematic Biology*, 65(4), 583–601.  
716 <https://doi.org/10.1093/sysbio/syw022>
- 717 Bolòs, O. de 1924–2007. (1990). *Flora manual dels països catalans*.  
718 <https://doi.org/10.1017/CBO9781107415324.004>
- 719 Bouckaert, R., Heled, J., Kühnert, D., Vaughan, T., Wu, C.-H., Xie, D., Drummond, A. J. (2014).  
720 BEAST 2: A Software Platform for Bayesian Evolutionary Analysis. *PLOS Computational*  
721 *Biology*, 10(4), 1–6. <https://doi.org/10.1371/journal.pcbi.1003537>
- 722 Browicz, K. (1989). Chorology of the Euxinian and Hyrcanian element in the woody flora of  
723 Asia. *Plant Systematics and Evolution*, 162(1), 305–314.  
724 <https://doi.org/10.1007/BF00936923>
- 725 Caetano, D. S., O’Meara, B. C., & Beaulieu, J. M. (2018). Hidden state models improve state-  
726 dependent diversification approaches, including biogeographical models. *Evolution*,  
727 72(11), 2308–2324. <https://doi.org/https://doi.org/10.1111/evo.13602>
- 728 Celep, F., Atalay, Z., Dikmen, F., Doğan, M., & Classen-Bockhoff, R. (2014). Flies as pollinators  
729 of melittophilous *Salvia* species (Lamiaceae). *American Journal of Botany*, 101(12), 2148–  
730 2159. <https://doi.org/10.3732/ajb.1400422>
- 731 Claßen-Bockhoff, R., Speck, T., Tweraser, E., Wester, P., Thimm, S., & Reith, M. (2004). The  
732 staminal lever mechanism in *Salvia* L. (Lamiaceae): A key innovation for adaptive  
733 radiation? *Organisms Diversity and Evolution*, 4(3), 189–205.  
734 <https://doi.org/10.1016/j.ode.2004.01.004>
- 735 Claßen-Bockhoff, R., Wester, P., & Tweraser, E. (2003). The Staminal Lever Mechanism in  
736 *Salvia* L. (Lamiaceae) - a Review. *Plant Biology*, 5(1), 33–41. [https://doi.org/10.1055/s-](https://doi.org/10.1055/s-2003-37973)  
737 [2003-37973](https://doi.org/10.1055/s-2003-37973)
- 738 Crane, P. R., Friis, E. M., & Pedersen, K. R. (1995). The origin and early diversification of  
739 angiosperms. *Nature*, 374(6517), 27–33. <https://doi.org/10.1038/374027A0>
- 740

- 741 Crepet, W. L. (2000). Progress in understanding angiosperm history, success, and  
742 relationships: Darwin's abominably "perplexing phenomenon." *Proceedings of*  
743 *the National Academy of Sciences*, 97(24), 12939 LP-12941. Retrieved from  
744 <http://www.pnas.org/content/97/24/12939.abstract>
- 745 Deng, T., Nie, Z., Drew, B. T., Volis, S., & Kim, C. (2015). Does the Arcto-Tertiary  
746 Biogeographic Hypothesis Explain the Disjunct Distribution of Northern Hemisphere  
747 Herbaceous Plants ? The Case of Meehania ( Lamiaceae ), 1–18.  
748 <https://doi.org/10.1371/journal.pone.0117171>
- 749 Djamali, M., Baumel, A., Brewer, S., Jackson, S. T., Kadereit, J. W., López-vinyallonga, S.,  
750 Simakova, A. (2012). Review of Palaeobotany and Palynology Ecological implications of  
751 Cousinia Cass . ( Asteraceae ) persistence through the last two glacial – interglacial  
752 cycles in the continental Middle East for the Irano-Turanian fl ora. *Review of*  
753 *Palaeobotany and Palynology*, 172, 10–20.  
754 <https://doi.org/10.1016/j.revpalbo.2012.01.005>
- 755 Dodd, M. E., Silvertown, J., Chase, M. W. (1999). Analysis of trait evolution and species  
756 diversity variation among angiosperm families. *Evolution*, 53(3), 732–744.
- 757 Drew, B. T., & Sytsma, K. J. (2012). Phylogenetics, biogeography, and staminal evolution in  
758 the tribe Mentheae (Lamiaceae). *American Journal of Botany*, 99(5), 933–953.  
759 <https://doi.org/10.3732/ajb.1100549>
- 760 Drew, B. T., González-gallegos, J. G., Xiang, C., Kriebel, R., Drummond, C. P., Walker, J. B., &  
761 Sytsma, K. J. (2017). *Salvia* united : The greatest good for the greatest number. *TAXON*,  
762 66(1), 133–145.
- 763 Drummond, A. J., & Rambaut, A. (2007). BEAST : Bayesian evolutionary analysis by sampling  
764 trees, 8, 1–8. <https://doi.org/10.1186/1471-2148-7-214>
- 765 Epling, C. (1938-1939) A revision of *Salvia*, subgenus *Calosphace*. Feddes Rep. Beith., 110, 1-  
766 383.
- 767 Etienne, R. S., & Haegeman, B. (2012). A conceptual and statistical framework for adaptive  
768 radiations with a key role for diversity dependence. *American Naturalist*, 180(4).  
769 <https://doi.org/10.1086/667574>
- 770 Fenster, C. B., Armbruster, W. S., Wilson, P., Dudash, M. R., & Thomson, J. D. (2004).  
771 Pollination syndromes and floral specialization. *Annual Review of Ecology, Evolution, and*  
772 *Systematics*, 35, 375–403. <https://doi.org/10.1146/annurev.ecolsys.34.011802.132347>
- 773 Fernández-Mazuecos, M., Blanco-Pastor, J. L., Gómez, J. M., & Vargas, P. (2013). Corolla  
774 morphology influences diversification rates in bifid toadflaxes (*Linaria* sect. *Versicolores*).  
775 *Annals of Botany*, 112(9), 1705–1722. <https://doi.org/10.1093/aob/mct214>

- 776 Ferrari, L., Orozco-Esquivel, T., Manea, V., & Manea, M. (2012). The dynamic history of the  
777 Trans-Mexican Volcanic Belt and the Mexico subduction zone. *Tectonophysics*, 522–  
778 523, 122–149. <https://doi.org/10.1016/j.tecto.2011.09.018>
- 779 FitzJohn, R. G. (2012). Diversitree : comparative phylogenetic analyses of diversification in R.  
780 *Methods in Ecology and Evolution*, (3), 1084–1092. [https://doi.org/10.1111/j.2041-](https://doi.org/10.1111/j.2041-210X.2012.00234.x)  
781 [210X.2012.00234.x](https://doi.org/10.1111/j.2041-210X.2012.00234.x)
- 782 FitzJohn, R. G., Pennell, M. W., Zanne, A. E., Stevens, P. F., Tank, D. C., & Cornwell, W. K.  
783 (2014). How much of the world is woody ?, (Theophrastus 1916), 1266–1272.  
784 <https://doi.org/10.5061/dryad.63q27/2>
- 785 Fragoso-Martínez, I., Martínez-Gordillo, M., Salazar, G. A., Sazatornil, F., Jenks, A. A., García  
786 Peña, M. del R., Granados Mendoza, C. (2018). Phylogeny of the Neotropical sages  
787 (*Salvia* subg. *Calospatha*; Lamiaceae) and insights into pollinator and area shifts. *Plant*  
788 *Systematics and Evolution*, 304(1), 43–55. <https://doi.org/10.1007/s00606-017-1445-4>
- 789 Folk, R. A., C. M. Siniscalchi, D. E. Soltis. 2020. Angiosperms at the edge: Extremity and  
790 diversity. *Plant, Cell & Environment* 43: 2871– 2893.  
791 <https://doi.org/10.1111/pce.13887>
- 792 Gillespie, R. G., Bennett, G. M., De Meester, L., Feder, J. L., Fleischer, R. C., Harmon, L. J  
793 Wogan, G. O. U. (2020). Comparing Adaptive Radiations Across Space, Time, and Taxa.  
794 *Journal of Heredity*, 111(1), 1–20. <https://doi.org/10.1093/jhered/esz064>
- 795 Gómez, J. M., Torices, R., Lorite, J., Klingenberg, C. P., & Perfectti, F. (2016). The role of  
796 pollinators in the evolution of corolla shape variation, disparity and integration in a  
797 highly diversified plant family with a conserved floral bauplan. *Annals of Botany*,  
798 117(5), 889–904. <https://doi.org/10.1093/aob/mcv194>
- 799 Givnish, T. J. (2015). Adaptive radiation versus “ radiation ” and “ explosive diversification ”:  
800 why conceptual distinctions are fundamental to understanding evolution, *New*  
801 *Phytologist*, 207, 297–303..
- 802 Han, T.-S., Zheng, Q.-J., Onstein, R. E., Rojas-Andrés, B. M., Hauenschield, F., Muellner-Riehl,  
803 A. N., & Xing, Y.-W. (2020). Polyploidy promotes species diversification of *Allium*  
804 through ecological shifts. *New Phytologist*, 225(1), 571–583.  
805 <https://doi.org/https://doi.org/10.1111/nph.16098>
- 806 Hansen, T. F. (1997). Stabilizing selection and the comparative analysis of adaptation.  
807 *Evolution*, 51(5), 1341–1351. <https://doi.org/10.1111/j.1558-5646.1997.tb01457.x>.
- 808 Harder, L. D., & Johnson, S. D. (2009). Darwin’ s beautiful contrivances : evolutionary and  
809 functional evidence. *New Phytologist*, 183, 530–545. [https://doi.org/10.1111/j.1469-](https://doi.org/10.1111/j.1469-8137.2009.02914.x)  
810 [8137.2009.02914.x](https://doi.org/10.1111/j.1469-8137.2009.02914.x)
- 811 Harley, R. M., Atkins, S., Budantsev, A. L., Cantino, P. D., Conn, B. J., Grayer, R., Upson, T.  
812 (2004). Labiatae. In J. W. Kadereit (Ed.), *Flowering Plants-Dicotyledons: Lamiales*

- 813 (except *Acanthaceae* including *Avicenniaceae*) (pp. 167–275). Berlin, Heidelberg:  
814 Springer Berlin Heidelberg. [https://doi.org/10.1007/978-3-642-18617-2\\_11](https://doi.org/10.1007/978-3-642-18617-2_11)
- 815 Harmon, L. J., Schulte, J. A., Larson, A., & Losos, J. B. (2003). Tempo and Mode of  
816 Evolutionary Radiation in Iguanian Lizards. *Science*, 301(5635), 961–964.  
817 <https://doi.org/10.1126/science.1084786>
- 818 Harmon Luke J, Jason T Weir, Chad D Brock, Richard E Glor, and Wendell Challenger.  
819 2008. GEIGER: investigating evolutionary radiations. *Bioinformatics* 24, 129-131.
- 820 Harmon, L. J., Losos, J. B., Jonathan Davies, T., Gillespie, R. G., Gittleman, J. L., Bryan  
821 Jennings, W., Mooers, A. T. (2010). Early bursts of body size and shape evolution are  
822 rare in comparative data. *Evolution*, 64(8), 2385–2396. [https://doi.org/10.1111/j.1558-](https://doi.org/10.1111/j.1558-5646.2010.01025.x)  
823 [5646.2010.01025.x](https://doi.org/10.1111/j.1558-5646.2010.01025.x)
- 824
- 825 Harrington, S., & Reeder, T. W. (2017). Rate heterogeneity across Squamata, misleading  
826 ancestral state reconstruction and the importance of proper null model specification,  
827 30, 313–325. <https://doi.org/10.1111/jeb.13004>
- 828 Hedge, I.C. (1982a). *Salvia* L. In: Davis PH (ed.) *Flora of Turkey and the East Aegean Islands*,  
829 7, 400-461. Edinburgh Univ. Press.
- 830 Hedge, I.C. (1982b). *Salvia* L. In: Rechinger KH (ed.), *Flora Iranica* 150, 403-476, Akademische  
831 Druck und Verlagsanstalt, Graz.
- 832 Helmstetter, A. J., Glemin, S., Käfer, J., Zenil-Ferguson, R., Sauquet, H., de Boer, H.  
833 Condamine, F. L. (2021). Pulled Diversification Rates, Lineages-Through-Time Plots and  
834 Modern Macroevolutionary Modelling. *BioRxiv*.  
835 <https://doi.org/10.1101/2021.01.04.424672>
- 836 Hernández-Hernández, T., & Wiens, J. J. (2020). Why are there so many flowering plants? A  
837 multiscale analysis of plant diversification. *American Naturalist*, 195(6), 948–963.  
838 <https://doi.org/10.1086/708273>
- 839 Hu, G.-X., Takano, A., Drew, B. T., Liu, E.-D., Soltis, D. E., Soltis, P. S., Xiang, C.-L. (2018).  
840 Phylogeny and staminal evolution of *Salvia* (Lamiaceae, Nepetoideae) in East Asia.  
841 *Annals of Botany*, 122(4), 649–668. <https://doi.org/10.1093/aob/mcy104>
- 842 Hu, G.-X., Liu, E.-D., Wu, Z.-K., Sytsma, K. J., Drew, B. T., & Xiang, C.-L. (2020). Integrating  
843 DNA Sequences with Morphological Analysis Clarifies Phylogenetic Position of *Salvia*  
844 *grandifolia* (Lamiaceae): An Enigmatic Species Endemic to Southwestern China.  
845 *International Journal of Plant Sciences*, 181(8), 787–799.  
846 <https://doi.org/10.1086/709134>

- 847 Kaczorowski, R. L., Seliger, A. R., Gaskett, A. C., Wigsten, S. K., & Raguso, R. A. (2012). Corolla  
848 shape vs. size in flower choice by a nocturnal hawkmoth pollinator. *Functional Ecology*,  
849 26(3), 577–587. <https://doi.org/10.1111/j.1365-2435.2012.01982.x>
- 850 Koutroumpa, K., Warren, B. H., Theodoridis, S., Coiro, M., Romeiras, M. M., Jiménez, A., &  
851 Conti, E. (2021). Geo-Climatic Changes and Apomixis as Major Drivers of Diversification  
852 in the Mediterranean Sea Lavenders (*Limonium* Mill.). *Frontiers in Plant*  
853 *Science* .<https://doi.org/10.3389/fpls.2020.612258>
- 854 Kay, K. M., & Sargent, R. D. (2009). The Role of Animal Pollination in Plant Speciation:  
855 Integrating Ecology, Geography, and Genetics. *Annual Review of Ecology, Evolution,*  
856 *and Systematics*, 40(1), 637–656.  
857 <https://doi.org/10.1146/annurev.ecolsys.110308.120310>
- 858 Kriebel, R., Drew, B. T., Drummond, C. P., González-Gallegos, J. G., Celep, F., Mahdjoub, M.  
859 M., Sytsma, K. J. (2019). Tracking temporal shifts in area, biomes, and pollinators in the  
860 radiation of *Salvia* (sages) across continents: leveraging anchored hybrid enrichment  
861 and targeted sequence data. *American Journal of Botany*, 106(4), 573–597.  
862 <https://doi.org/10.1002/ajb2.1268>
- 863 Kriebel, R., Drew, B., González-Gallegos, J. G., Celep, F., Heeg, L., Mahdjoub, M. M., &  
864 Sytsma, K. J. (2020). Pollinator shifts, contingent evolution, and evolutionary constraint drive  
865 floral disparity in *Salvia* (Lamiaceae): Evidence from morphometrics and phylogenetic  
866 comparative methods. *Evolution*, 74(7), 1335–1355. <https://doi.org/10.1111/evo.14030>
- 867 Lagomarsino, L. P., Condamine, F. L., Antonelli, A., Mulch, A., & Davis, C. C. (2016). The  
868 abiotic and biotic drivers of rapid diversification in Andean bellflowers  
869 (Campanulaceae). *New Phytologist*, 210(4), 1430–1442.  
870 <https://doi.org/10.1111/nph.13920>
- 871 Landis, J. B., Bell, C. D., Hernandez, M., Zenil-Ferguson, R., McCarthy, E. W., Soltis, D. E., &  
872 Soltis, P. S. (2018). Evolution of floral traits and impact of reproductive mode on  
873 diversification in the phlox family (Polemoniaceae). *Molecular Phylogenetics and*  
874 *Evolution*, 127(June), 878–890. <https://doi.org/10.1016/j.ympev.2018.06.035>
- 875 Landis, J. B., Toole, R. D. O., Ventura, K. L., & Gitzendanner, M. A. (2016). The Phenotypic  
876 and Genetic Underpinnings of Flower Size in Polemoniaceae The Phenotypic and  
877 Genetic Underpinnings of Flower Size in Polemoniaceae, 6(November), 1–20.  
878 <https://doi.org/10.3389/fpls.2015.01144>
- 879 Li, B., Cantino, P. D., Olmstead, R. G., Bramley, G. L. C., Xiang, C. L., Ma, Z. H., Zhang, D. X.  
880 (2016). A large-scale chloroplast phylogeny of the Lamiaceae sheds new light on its  
881 subfamilial classification. *Scientific Reports*, 6(October).  
882 <https://doi.org/10.1038/srep34343>
- 883 Li, P., Qi, Z. C., Liu, L. X., Ohi-Toma, T., Lee, J., Hsieh, T. H., Qiu, Y. X. (2017). Molecular  
884 phylogenetics and biogeography of the mint tribe Elsholtzieae (Nepetoideae),

- 885 Lamiaceae), with an emphasis on its diversification in East Asia. *Scientific Reports*, 7(1),  
886 1–12. <https://doi.org/10.1038/s41598-017-02157-6>
- 887 Louca, S., & Pennell, M. W. (2020). Extant timetrees are consistent with a myriad of  
888 diversification histories. *Nature*, 580(7804), 502–505.
- 889 Maddison, W. P., Midford, P. E., & Otto, S. P. (2007). Estimating a Binary Character’s Effect  
890 on Speciation and Extinction. *Systematic Biology*, 56(5), 701–710. Retrieved from  
891 <http://dx.doi.org/10.1080/10635150701607033>
- 892 Malik, S., Vitales, D., Qasim Hayat, M., Korobkov, A. A., Garnatje, T., & Vallès, J. (2017).  
893 Phylogeny and biogeography of *Artemisia* subgenus *seriphidium* (Asteraceae:  
894 Anthemideae). *Taxon*, 66(4), 934–952. <https://doi.org/10.12705/664.8>
- 895 Manafzadeh, S., Salvo, G., & Conti, E. (2013). A tale of migrations from east to west : the  
896 Irano-Turanian floristic region as a source of Mediterranean xerophytes, 1–14.  
897 <https://doi.org/10.1111/jbi.12185>.
- 898 Manafzadeh, S., Staedler, Y. M., & Conti, E. (2016). Visions of the past and dreams of the  
899 future in the Orient : the Irano-Turanian region from classical botany to evolutionary  
900 studies, 9. <https://doi.org/10.1111/brv.12287>
- 901 McGuire, J. A., Witt, C. C., Remsen, J. V., Corl, A., Rabosky, D. L., Altshuler, D. L., & Dudley, R.  
902 (2014). Molecular phylogenetics and the diversification of hummingbirds. *Current*  
903 *Biology*, 24(8), 910–916. <https://doi.org/10.1016/j.cub.2014.03.016>
- 904
- 905 Ogutcen, E., Hamper, B., & Vamosi, J. C. (2014). Diversification in monkeyflowers: an  
906 investigation of the effects of elevation and floral color in the genus *Mimulus*.  
907 *International Journal of Evolutionary Biology*, 2014, 382453.  
908 <https://doi.org/10.1155/2014/382453>
- 909 Ohashi, K., Jürgens, A., & Thomson, J. D. (2021). Trade-off mitigation : a conceptual  
910 framework for understanding floral adaptation in multispecies interactions, 6.  
911 <https://doi.org/10.1111/brv.12754>
- 912 Onstein, R. E. (2019). Darwin’s second “abominable mystery”: trait flexibility as the  
913 innovation leading to angiosperm diversity. *New Phytologist*.  
914 <https://doi.org/10.1111/nph.16294>
- 915 Paradis, E., Claude, J., & Strimmer, K. (2004). APE: Analyses of phylogenetics and evolution  
916 in R language. *Bioinformatics*, 20(2), 289–290.  
917 <https://doi.org/10.1093/bioinformatics/btg412>
- 918 Pavlopoulos, G. A., Hooper, S. D., Sifrim, A., Schneider, R., & Aerts, J. (2011). Medusa: A tool  
919 for exploring and clustering biological networks. *BMC Research Notes*, 4(1), 384.  
920 <https://doi.org/10.1186/1756-0500-4-384>

- 921 Phylogenomic Mining of the Mints Reveals Multiple Mechanisms Contributing to the  
922 Evolution of Chemical Diversity in Lamiaceae. (2018). *Molecular Plant*, 11(8), 1084–  
923 1096. <https://doi.org/https://doi.org/10.1016/j.molp.2018.06.002>
- 924
- 925 Pincheira-Donoso, D., Harvey, L. P., & Ruta, M. (2015). What defines an adaptive radiation?  
926 Macroevolutionary diversification dynamics of an exceptionally species-rich continental  
927 lizard radiation. *BMC Evolutionary Biology*, 15(1), 153. [https://doi.org/10.1186/s12862-](https://doi.org/10.1186/s12862-015-0435-9)  
928 015-0435-9
- 929 Pobedimova, E.G. (1954). *Salvia* L. - In: Schischkin, B.K. (ed.), *Flora of the USSR*  
930 21, 178-260. [ translated from Russian] Israel Prog. Sci. Transel., Jerusalem.
- 931 Pyron, R. A., & Burbrink, F. T. (2013). Phylogenetic estimates of speciation and extinction  
932 rates for testing ecological and evolutionary hypotheses. *Trends in Ecology & Evolution*,  
933 28(12), 729–736. <https://doi.org/10.1016/j.tree.2013.09.007>
- 934 Rabosky, D. L. (2006). LASER: A Maximum Likelihood Toolkit for Detecting Temporal Shifts in  
935 Diversification Rates from Molecular Phylogenies. *Evolutionary Bioinformatics*, 2, 247-  
936 250. <https://doi.org/10.1177/117693430600200024>.
- 937 Rabosky, D. L. (2017). Phylogenetic tests for evolutionary innovation: The problematic link  
938 between key innovations and exceptional diversification. *Philosophical Transactions of*  
939 *the Royal Society B: Biological Sciences*, 372(1735).  
940 <https://doi.org/10.1098/rstb.2016.0417>
- 941 Rabosky, D. L., & Goldberg, E. E. (2017). FiSSE: A simple nonparametric test for the effects of  
942 a binary character on lineage diversification rates. *Evolution*, 71(6), 1432–1442.  
943 <https://doi.org/https://doi.org/10.1111/evo.13227>
- 944 Rabosky, D. L., & Goldberg, E. E. (2015). Model Inadequacy and Mistaken Inferences of Trait-  
945 Dependent Speciation. *Systematic Biology*, 64(2), 340–355.  
946 <https://doi.org/10.1093/sysbio/syu131>
- 947 Rabosky, D. L., Grundler, M., Anderson, C., Title, P., Shi, J. J., Brown, J. W., Larson, J. G.  
948 (2014). BAMMtools : an R package for the analysis of evolutionary dynamics on  
949 phylogenetic trees, 701–707. <https://doi.org/10.1111/2041-210X.12199>
- 950 Rabosky, Daniel L. 2014. “Automatic Detection of Key Innovations, Rate Shifts, and Diversity-  
951 Dependence on Phylogenetic Trees.” *PLoS ONE* 9(2).
- 952 Reith, M., Baumann, G., Claßen-Bockhoff, R., & Speck, T. (2007). New insights into the  
953 functional morphology of the lever mechanism of *Salvia pratensis* (Lamiaceae). *Annals*  
954 *of Botany*, 100(2), 393–400. <https://doi.org/10.1093/aob/mcm031>

- 955 Revell, L. J. (2012). phytools : an R package for phylogenetic comparative biology ( and other  
956 things ), *Methods in Ecology and Evolution*, 3: 217–223. [https://doi.org/10.1111/j.2041-](https://doi.org/10.1111/j.2041-210X.2011.00169.x)  
957 [210X.2011.00169.x](https://doi.org/10.1111/j.2041-210X.2011.00169.x)
- 958 Ricklefs, R. E. (2007). Estimating diversification rates from phylogenetic information. *Trends*  
959 *in Ecology and Evolution*, 22(11), 601–610. <https://doi.org/10.1016/j.tree.2007.06.013>
- 960 Sauquet, H., Balthazar, M. Von, Magallón, S., Doyle, J. A., Endress, P. K., Bailes, E. J., ...  
961 Schönenberger, J. (2017). The ancestral flower of angiosperms and its early  
962 diversification. *Nature Communications*, 8. <https://doi.org/10.1038/ncomms16047>
- 963 Seelanan, T., Schnabel, A., & Wendel, J. F. (1997). Congruence and Consensus in the Cotton  
964 Tribe (Malvaceae). *Systematic Botany*, 22(2), 259–290.  
965 <https://doi.org/10.2307/2419457>
- 966 Serrano-Serrano, M. L., Perret, M., Guignard, M., Chautems, A., Silvestro, D., & Salamin, N.  
967 (2015). Decoupled evolution of floral traits and climatic preferences in a clade of  
968 Neotropical Gesneriaceae. *BMC Evolutionary Biology*, 15(1), 1–12.  
969 <https://doi.org/10.1186/s12862-015-0527-6>
- 970 Smith, S. A., & O’Meara, B. C. (2012). treePL: divergence time estimation using penalized  
971 likelihood for large phylogenies. *Bioinformatics*, 28(20), 2689–2690. Retrieved from  
972 <http://dx.doi.org/10.1093/bioinformatics/bts492>
- 973 Smith, S. D. (2010). Using phylogenetics to detect pollinator-mediated floral evolution. *New*  
974 *Phytologist*, 354–363.
- 975 Smith, S. D., & Kriebel, R. (2018). Convergent evolution of floral shape tied to pollinator  
976 shifts in *lochrominae* (Solanaceae)\*. *Evolution*, 72(3), 688–697.  
977 <https://doi.org/10.1111/evo.13416>.
- 978 Soltanipour, M.A, Jamzad, Z., Jalili, A., Mahmoodi, M (2020). The conservation status of  
979 *Zhumeria majdae*, an endemic species of Iran. *Iran Nature*.  
980 <https://dx.doi.org/10.22092/irn.2021.121273>
- 981 Soltis, D. E., Bell, C. D., Kim, S., & Soltis, P. S. (2008). Origin and Early Evolution of  
982 Angiosperms. *Annals OF THE New York A Cademy of Sciences*, 25, 3–25.  
983 <https://doi.org/10.1196/annals.1438.005>
- 984 Soltis, P.S. & D.E. Soltis. 2004. Phylogeny and evolution of the angiosperms. *Am. J. Botany*  
985 91: 1614–1626.
- 986 Soltis, D. E., Mort, M. E., Latvis, M., Mavrodiev, E. V., O’Meara, B. C., Soltis, P. S., Burleigh, J.  
987 G., & Rubio de Casas, R. (2013). Phylogenetic relationships and character evolution  
988 analysis of Saxifragales using a supermatrix approach. *American journal of botany*,  
989 100(5), 916–929. <https://doi.org/10.3732/ajb.1300044>



- 990 Soltis PS, Soltis DE. 2014. Flower diversity and angiosperm diversification. In: Riechmann JL,  
991 Wellmer F, eds. Flower development: methods and protocols. New York, NY, USA:  
992 Springer, 85–102.
- 993 Stebbins, G. L. (1970). Adaptive radiation of reproductive characteristics in angiosperms,  
994 4012 i: pollination mechanisms. *Annual Review of Ecology and Systematics*, 1, 307–326.
- 995 Takano, A. (2017). Taxonomic study on Japanese *Salvia* (Lamiaceae): Phylogenetic position  
996 of *S. akiensis*, and polyphyletic nature of *S. lutescens* var. *intermedia*. *PhytoKeys*, 80,  
997 87–104. <https://doi.org/10.3897/phytokeys.80.11611>
- 998 Takano, A., & Okada, H. (2011). Phylogenetic relationships among subgenera, species, and  
999 varieties of Japanese *Salvia* L. (Lamiaceae), 245–252. [https://doi.org/10.1007/s10265-](https://doi.org/10.1007/s10265-010-0367-9)  
1000 010-0367-9
- 1001 The Angiosperm Phylogeny Group III. (2009). An update of the Angiosperm Phylogeny Group  
1002 Classification for the orders and families of flowering plants: APG III. *Botanical Journal*  
1003 *of the Linnean Society*, 161(2), 105–121. [https://doi.org/10.1111/j.1095-](https://doi.org/10.1111/j.1095-8339.2009.00996.x)  
1004 8339.2009.00996.x
- 1005 Vamosi, J. C., Vamosi, S. M., Van der Niet, T., & Johnson, S. D. (2011). Factors influencing  
1006 diversification in angiosperms: At the crossroads of intrinsic and extrinsic traits.  
1007 *American Journal of Botany*, 98(3), 460–471. <https://doi.org/10.3732/ajb.1000311>
- 1008 Van der Niet, T., & Johnson, S. D. (2012). Phylogenetic evidence for pollinator-driven  
1009 diversification of angiosperms. *Trends in Ecology and Evolution*, 27(6), 353–  
1010 361. <https://doi.org/10.1016/j.tree.2012.02.002>
- 1011 Van Der Niet, T., Peakall, R., & Johnson, S. D. (2014). Pollinator-driven ecological speciation  
1012 in plants: New evidence and future perspectives. *Annals of Botany*, 113(2), 199–211.  
1013 <https://doi.org/10.1093/aob/mct290>
- 1014 Wagstaff, S. J., Olmstead, R. G., & Cantino, P. D. (1995). Parsimony analysis of cpDNA  
1015 restriction site variation in subfamily Nepetoideae (Labiatae). *American Journal of*  
1016 *Botany*, 82(7), 886–892. <https://doi.org/10.1002/j.1537-2197.1995.tb15705.x>
- 1017 Wagstaff, S. J., Olmstead, R. G., & Cantino, P. D. (1995). Parsimony analysis of cpDNA  
1018 restriction site variation in subfamily Nepetoideae (Labiatae). *American Journal of*  
1019 *Botany*, 82(7), 886–892. <https://doi.org/10.1002/j.1537-2197.1995.tb15705.x>
- 1020 Walker, J. B., & Sytsma, K. J. (2007). Staminal evolution in the genus *Salvia* (Lamiaceae):  
1021 Molecular phylogenetic evidence for multiple origins of the staminal lever. *Annals of*  
1022 *Botany*, 100(2), 375–391. <https://doi.org/10.1093/aob/mcl176>
- 1023 Walker, J. B., Sytsma, K. J., Treutlein, J., & Wink, M. (2004). *Salvia* (Lamiaceae) is not  
1024 monophyletic: Implications for the systematics, radiation, and ecological specializations  
1025 of *Salvia* and tribe Mentheae. *American Journal of Botany*, 91(7), 1115–1125.  
1026 <https://doi.org/10.3732/ajb.91.7.1115>

- 1027 Walker, J. B., Drew, B. T., & Sytsma, K. J. (2015). Unravelling Species Relationships and  
1028 Diversification within the Iconic California Floristic Province Sages (*Salvia* Subgenus  
1029 *Audibertia*, Lamiaceae). *Systematic Botany*, 40(3), 826–844.  
1030 <https://doi.org/10.1600/036364415X689285>
- 1031 Wester, P., & Claßen-Bockhoff, R. (2007). Floral diversity and pollen transfer mechanisms in  
1032 bird-pollinated *Salvia* species. *Annals of Botany*, 100(2), 401–421.  
1033 <https://doi.org/10.1093/aob/mcm036>
- 1034 Wester, P., & Claßen-Bockhoff, R. (2011). Pollination Syndromes of New World *Salvia*  
1035 Species with Special Reference to Bird Pollination<sup>1</sup>. *Annals of the Missouri Botanical*  
1036 *Garden*, 98(1), 101–155. <https://doi.org/10.3417/2007035>
- 1037 Wester, P., Cairampoma, L., Haag, S., Schramme, J., Neumeyer, C., & Claßen-Bockhoff, R.  
1038 (2020). Bee exclusion in bird-pollinated salvia flowers: The role of flower color versus  
1039 flower construction. *International Journal of Plant Sciences*, 181(8), 770–786.  
1040 <https://doi.org/10.1086/709132>
- 1041 Wessinger, C. A., Rausher, M. D., & Hileman, L. C. (2019). Adaptation to hummingbird  
1042 pollination is associated with reduced diversification in Penstemon. Landis, J. B., Bell,  
1043 Charles D. Wessinger, C. A., Rausher, M. D., & Hileman, L. C. (2019). Adaptation to  
1044 hummingbird pollination is associated with reduced diversifi. *Evolution Letters*, 3(5),  
1045 521–533. <https://doi.org/https://doi.org/10.1002/evl3.130>
- 1046 Will, M., & Claßen-Bockhoff, R. (2014). Why Africa matters: Evolution of Old World *Salvia*  
1047 (Lamiaceae) in Africa. *Annals of Botany*, 114(1), 61–83.  
1048 <https://doi.org/10.1093/aob/mcu081>
- 1049 Will, M., & Claßen-Bockhoff, R. (2017). Time to split *Salvia* s.l. (Lamiaceae) – New insights  
1050 from Old World *Salvia* phylogeny. *Molecular Phylogenetics and Evolution*, 109, 33–58.  
1051 <https://doi.org/10.1016/j.ympev.2016.12.041>
- 1052 Will, M., Schmalz, N., & Classen-bockhoff, R. (2015). Towards a new classification of *Salvia* s.  
1053 l.: (re) establishing the genus *Pleudia* Raf ., 1–15. <https://doi.org/10.3906/bot-1405-34>
- 1054 Wu, H., Ma, P.-F., Li, H.-T., Hu, G.-X., & Li, D.-Z. (2021). Comparative plastomic analysis and  
1055 insights into the phylogeny of *Salvia* (Lamiaceae). *Plant Diversity*, 43(1), 15–26.  
1056 <https://doi.org/https://doi.org/10.1016/j.pld.2020.07.004>
- 1057 Yao, G., Drew, B. T., Yi, T. S., Yan, H. F., Yuan, Y. M., & Ge, X. J. (2016). Phylogenetic  
1058 relationships, character evolution and biogeographic diversification of *Pogostemon* s.l.  
1059 (Lamiaceae). *Molecular Phylogenetics and Evolution*, 98, 184–200.  
1060 <https://doi.org/10.1016/j.ympev.2016.01.02>
- 1061 Zanne, A. E. D. C. Tank, W. K. Cornwell, J. M. Eastman, S. A. Smith, R. G. FitzJohn, D. J.  
1062 McGlenn, B. C. O'Meara, A. T. Moles, P. B. Reich, D. L. Royer, D. E. Soltis, P. F. Stevens,  
1063 M. Westoby, I. J. Wright, L. Aarssen, R. I. Bertin, A. Calaminus, R. Govaerts, F.  
1064 Hemmings, M. R. Leishman, J. Oleksyn, P. S. Soltis, N. G. Swenson, L. Warman, J. M.

- 1065 Beaulieu. 2014. Into the cold - three keys to radiation of angiosperms into freezing  
1066 environments. *Nature* doi:10.1038/nature12872
- 1067 Zhang, B., Claßen-Bockhoff, R., Zhang, Z. Q., Sun, S., Luo, Y. J., & Li, Q. J. (2011). Functional  
1068 implications of the staminal lever mechanism in *Salvia cyclostegia* (Lamiaceae). *Annals*  
1069 *of Botany*, 107(4), 621–628. <https://doi.org/10.1093/aob/mcr011>
- 1070
- 1071
- 1072
- 1073
- 1074
- 1075

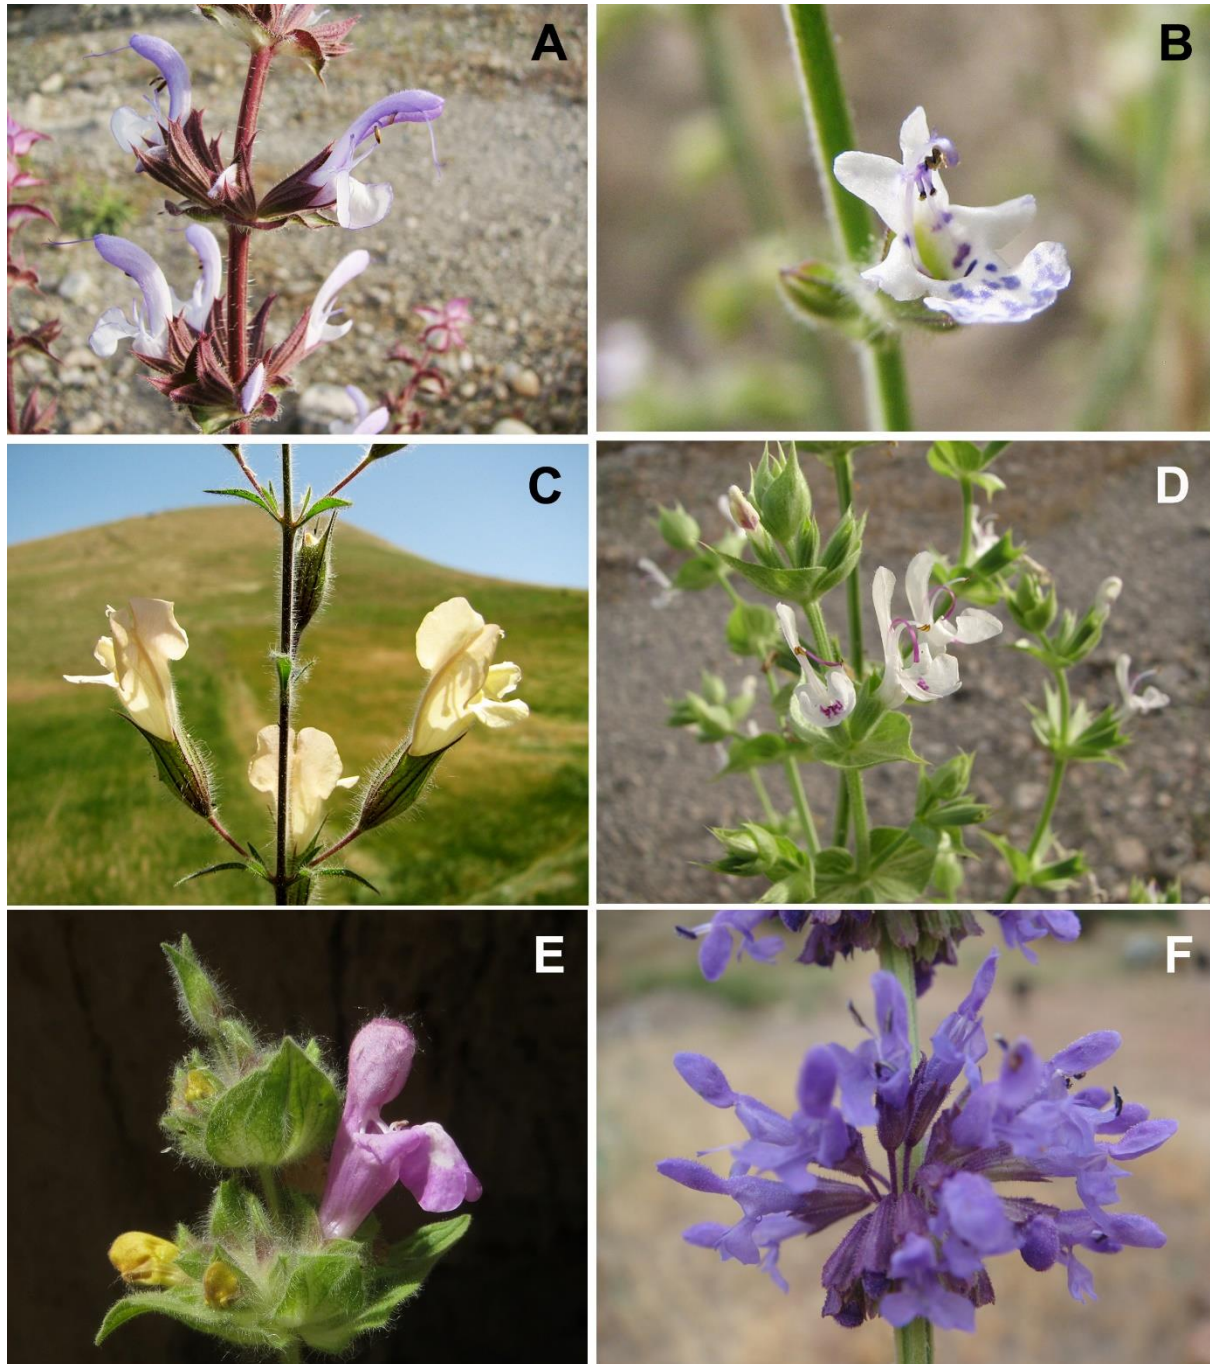

1076

1077

1078 **Fig 1:** Phenotypic diversity in Iranian *Salvia*. A: *Salvia sclarea* (clade I), B: *Salvia aegyptiaca* (clade III)  
1079 C: *Salvia aristata* (clade III), D: *Salvia macrosiphon* (clade I), E: *Salvia bracteata* (clade I), F: *Salvia*  
1080 *verticillata* (clade I). A-E: Photos by M. Mirtajzadini, F: Photo by K. Safikhani.

1081

1082

1083

1084

|           | Walker and Sytsma (2007) | Will and Claßen -Bockhoff (2017) | Drew et al. (2017), Hu et al. (2018) |
|-----------|--------------------------|----------------------------------|--------------------------------------|
| Clade I   |                          |                                  |                                      |
| Clade II  |                          |                                  |                                      |
| Clade III |                          |                                  |                                      |
| Clade IV  | Not determined           |                                  |                                      |

1085

1086 **Fig 2.** Schematic trees provide a summary of changes in *Salvia* delimitation based on previous phylogenetic  
1087 studies (Walker and Sytsma, 2007; Will and Bockhoff, 2017; Drew et al., 2017). Those species that are classified  
1088 under *Salvia* infrageneric delimitations are shown in red. Distinct genera from *Salvia* are indicated in black.  
1089 Walker and Systema (2007) recognized three distinct clades for *Salvia* phylogeny embedded within five genera  
1090 (*Perovskia*, *Rosmarinus*, *Dorystaechas*, *Meriandra* and *Zhumeria*). Will and Bockhoff (2017) identified just part  
1091 of clade I as *Salvia* sensu stricto and split *Salvia* into six genera. Drew et al. (2017) maintained *Salvia* in the broad  
1092 sense and treated the five genera in Walker and Sytsma (2007) as subgenera of *Salvia*. Hu et al. (2018) treated  
1093 clade IV (from eastern Asia) as subg. *Glutinaria*.

1094

1095

1096

1097

1098

1099

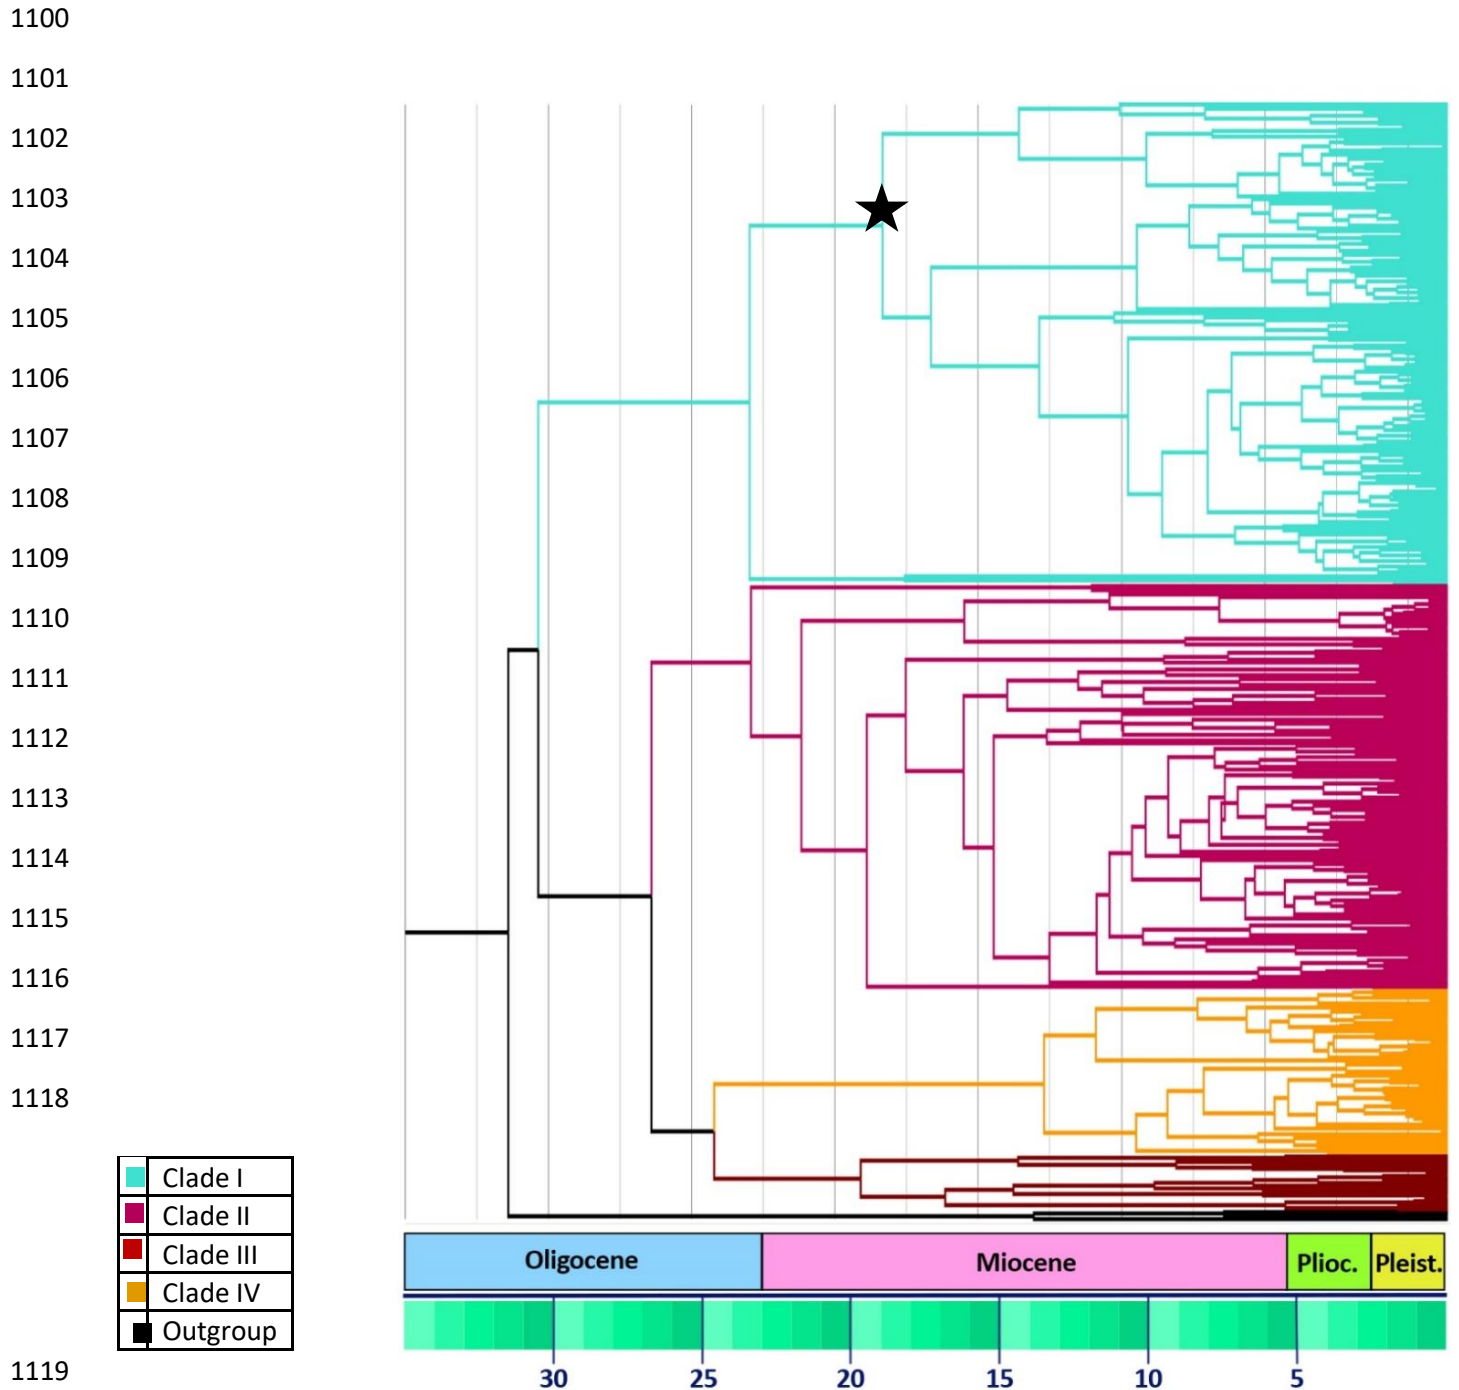

**Fig. 3:** Maximum Clade Credibility (MCC) obtained from BEAST analysis based on five combined nuclear and plastid spacer regions. The map is colored based on four identified clades in *Salvia*. The x-axis represents the age range of extant *Salvia* lineages. The star indicates divergence of the southwestern Asia clade I (Turkey and Iran) including subgenera *Sclarea* and *Salvia* from Subgenus *Heterosphaea*

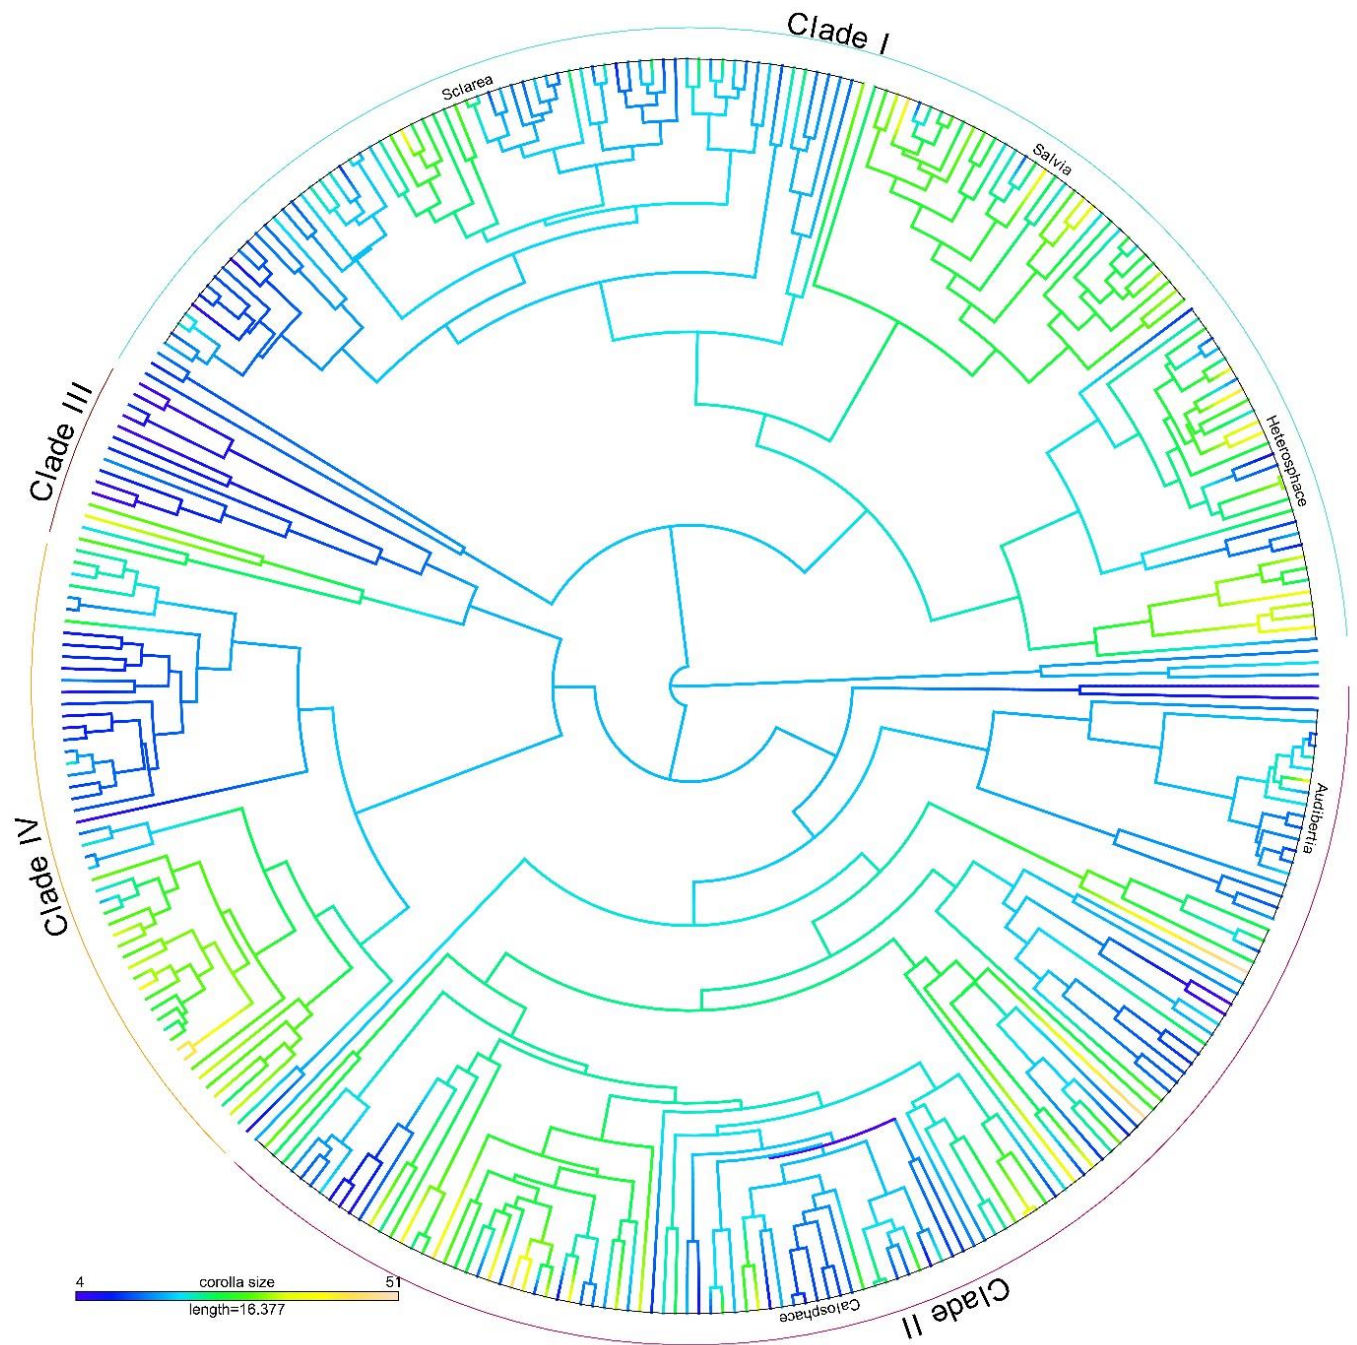

1128

1129

1130

1131 **Fig. 4:** Ancestral reconstruction of corolla length in *Salvia* on a dated phylogeny using maximum  
1132 likelihood in the phytools R package. The legend indicates the range of corolla length in mm by  
1133 branch color in *Salvia*. Four distinct clades in *Salvia* are identified by relevant colors on the  
1134 circumference of the tree.

1135

1136

1137

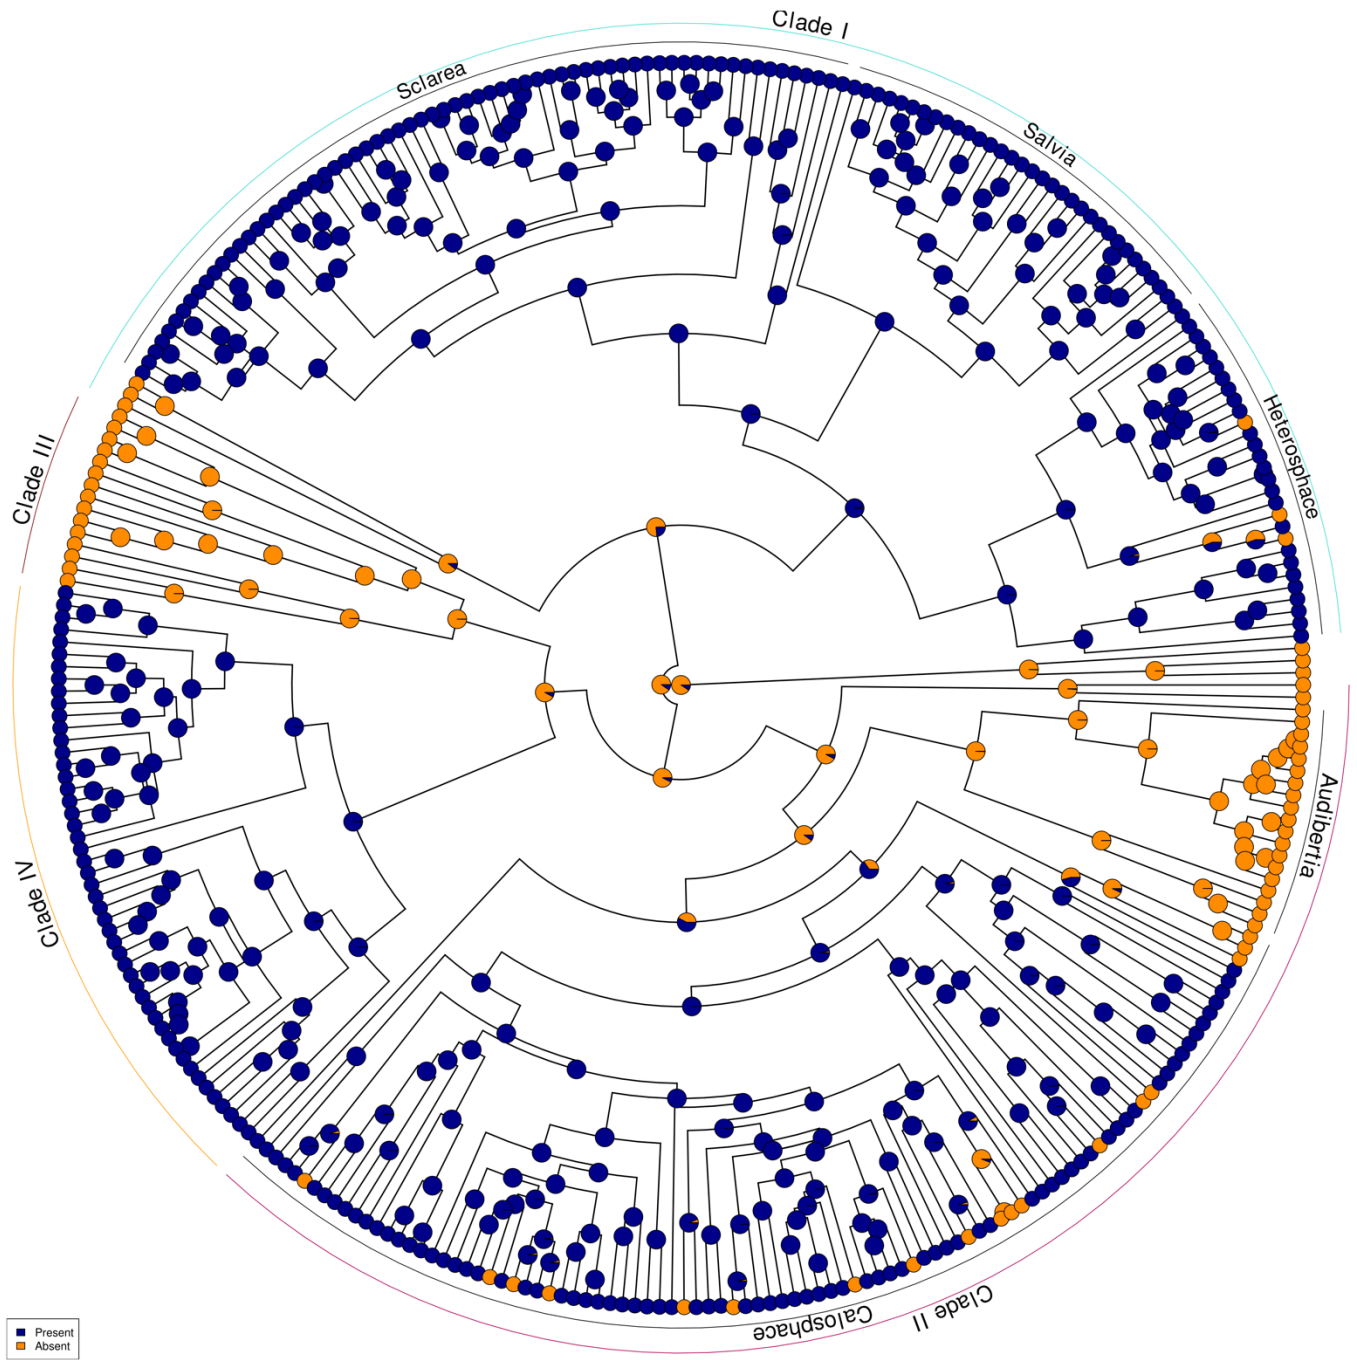

**Fig. 5:** Ancestral reconstruction of the lever mechanism trait (present/ absent) across *Salvia* phylogeny based on likelihood state with ARD model.



1147

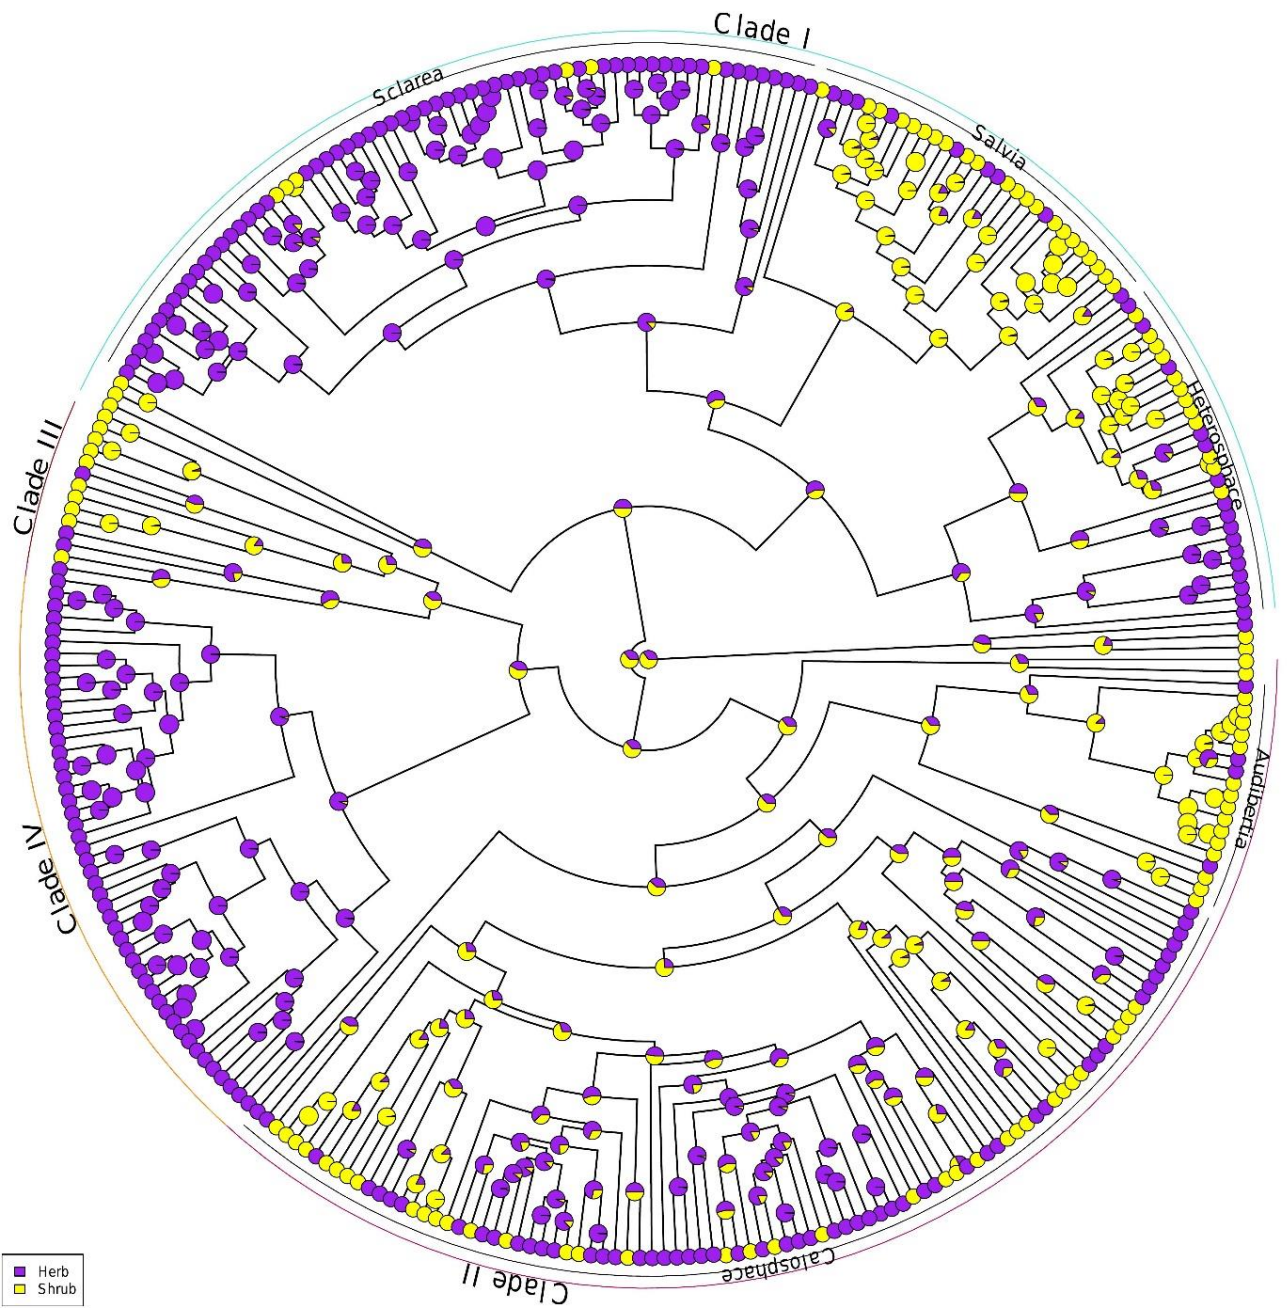

1157

1158

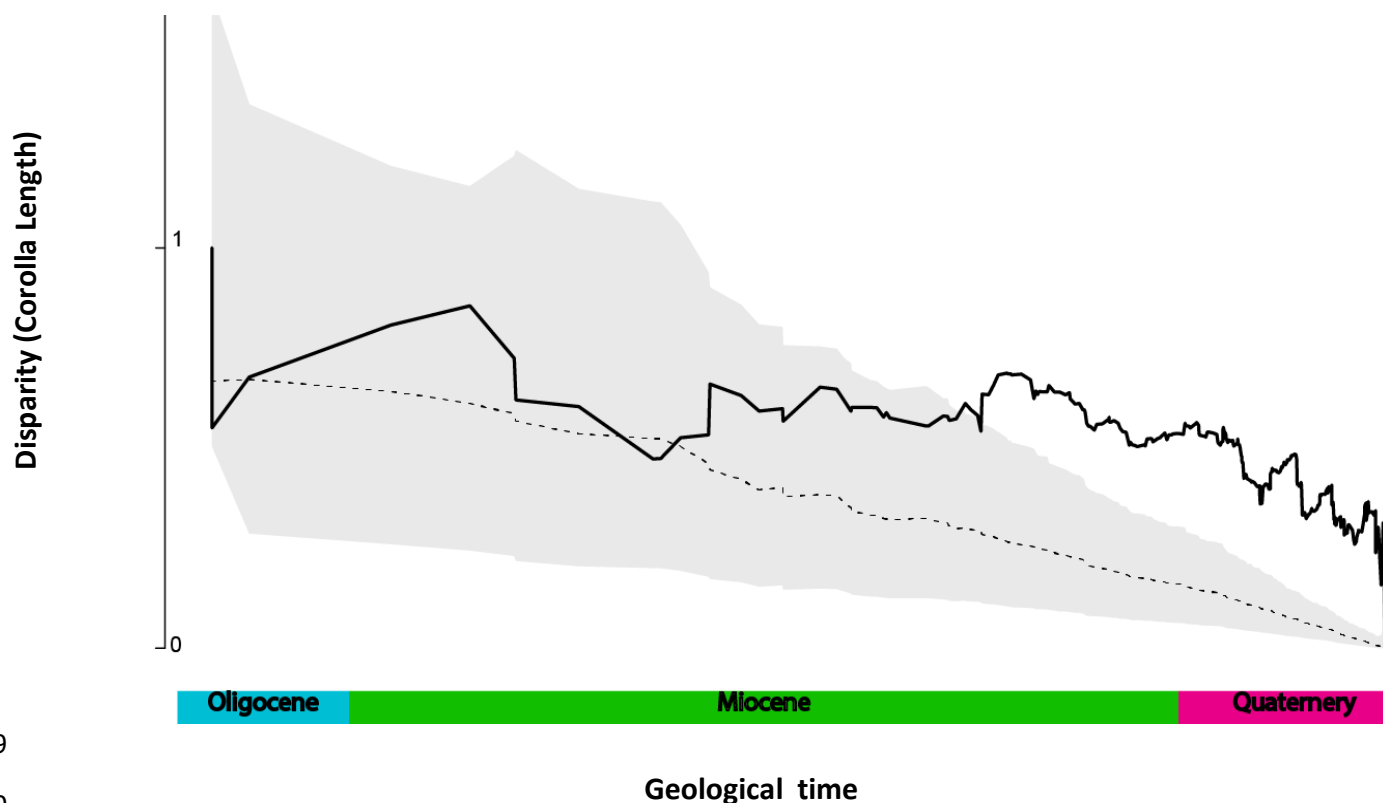

1159

1160

1161

1162 **Fig. 7:** The mean subclade Disparity Through Time (DTT) for corolla length compared with the  
1163 median subclade disparity under a Brownian motion model. The solid line shows the observed  
1164 disparity, and the dashed line is the mean disparity of 1000 simulations of corolla length disparity  
1165 over the phylogenetic tree. The grey shade indicates the 95% confidence interval of DTT.

1166

1167

1168

1169

1170

1171

1172

1173

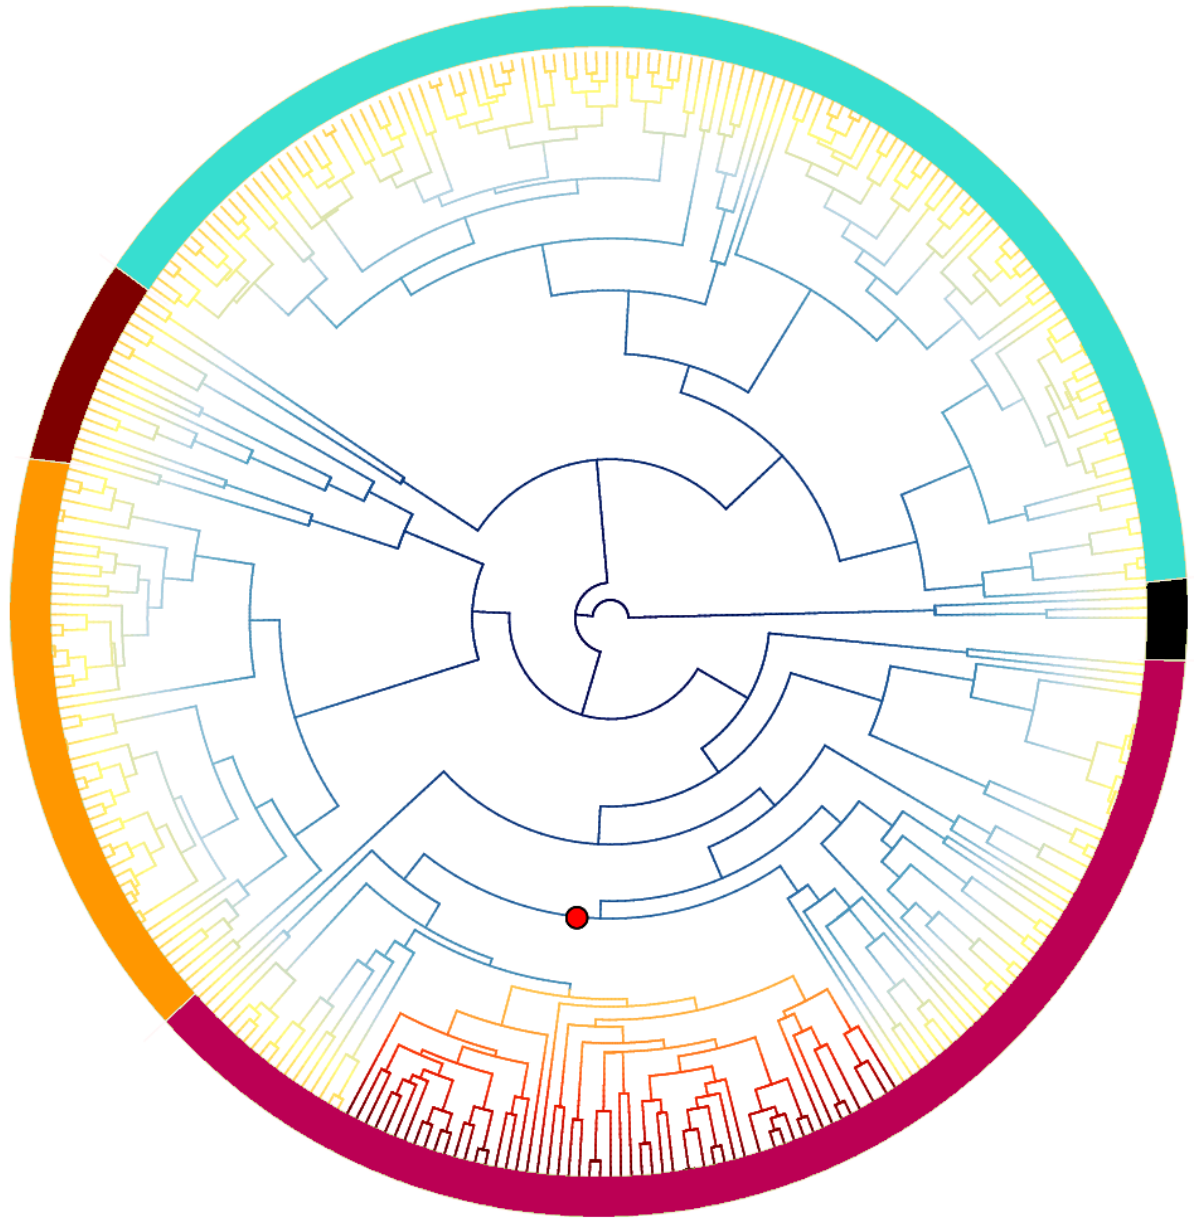

1174

1175

|                                                                                     |           |
|-------------------------------------------------------------------------------------|-----------|
|  | clade I   |
|  | clade II  |
|  | clade III |
|  | clade IV  |
|  | Outgroup  |

1179

1180 **Fig. 8:** Corolla length evolution across *Salvia* phylogeny based on a BAMM analysis. The best shift

1181 was detected in clade II in *Calosphace* clade

1182

1183

**Table 1:** Plant materials used in this study with their accession numbers. Newly generated sequences are shown in bold. TARI (National Herbarium of Iran, Research Institute of Forests and Rangelands)

|                                                                                                                          | Voucher                                                                        | ETS        | ITS      | Gen Bank<br>rpl32-trnl | trnl-trnf | Ycf1     |
|--------------------------------------------------------------------------------------------------------------------------|--------------------------------------------------------------------------------|------------|----------|------------------------|-----------|----------|
| <i>Lepechinia chamaedryoides</i> (Balb.) Epling (outgroup)                                                               | 1, 5) Drew and Sytsma 2011; 2) Walker and Sytsma 2007; 4) Walker et al., 2004. | JF301317   | DQ667231 | /                      | AY570459  | JF289031 |
| <i>Lepechinia leucopylloides</i> (Ramamoorthy, Hiriart & Medrano) B.T.Drew, Cacho & Sytsma, <b>comb. nov.</b> (outgroup) | 1, 2, 4, 5) Drew and Sytsma 2011; 3) Drew and Sytsma 2012.                     | JF301327.1 | JF301354 | JQ669348               | JF301390  | JF289047 |
| <i>Melissa officinalis</i> L. (outgroup)                                                                                 | 1, 2, 4, 5) Drew and Sytsma 2011; 3) Drew and Sytsma 2012.                     | JF301325   | JF301353 | JQ669335               | JF301386  | JF289042 |
| <i>S. africana-caerulea</i> L.                                                                                           | Will and Claßen-Bockhoff 2014.                                                 |            | KJ584204 | Kj7472171              | /         | /        |
| <i>Salvia absconditiflora</i> Greuter & Burdet (syn. <i>S. cryptantha</i> Montbret & Aucher ex Benth.)                   | Will and Claßen-Bockhoff 2017                                                  | /          | KU563839 | KU578211               | /         | //       |
| <i>Salvia acerifolia</i> B.L.Turner.                                                                                     | 2,4) Fragoso-Martinez et al., 2017.                                            | /          | MF664540 | /                      | MF663939  | /        |
| <i>Salvia adenocaulon</i> H.P.Davis                                                                                      | Will and Claßen-Bockhoff 2017.                                                 | /          | KU563828 | KU563828               | /         | /        |
| <i>Salvia adenophora</i> M.Martens & Galeotti                                                                            | 2,4) Fragoso-Martinez et al., 2017.                                            | /          | MF622100 | /                      | MF663940  | /        |
| <i>Salvia adenophylla</i> Hedge and Hub.-Mor.                                                                            | Will and Claßen-Bockhoff 2017.                                                 | /          | KU563789 | KU578218               | /         | /        |
| <b><i>Salvia aegyptiaca</i> L.</b>                                                                                       | Iran: Bushehr, TARI (26835).                                                   | MK204892   | /        | /                      | /         | /        |
| <b><i>Salvia aegyptiaca</i>.</b>                                                                                         | Iran: Hormozgan, TARI (102853).                                                | MK204891   | MK256969 | /                      | /         | /        |
| <b><i>Salvia aethiopsis</i> L.</b>                                                                                       | Iran: TARI (6604).                                                             | MK204890   | /        | /                      |           | MK240102 |
| <i>Salvia agnes</i>                                                                                                      | 2,4) Fragoso-Martinez et al., 2017.                                            |            | MF664541 |                        | MF663941  |          |
| <i>Salvia akiensis</i> A.Takano, T.Sera et Kurosaki.                                                                     | 1,2,4,5) Takano and Akiyama 2017.                                              | LC060826   | LC060279 | /                      | LC124188  | LC060530 |

|                                                  |                                                                                       |          |          |                |          |          |
|--------------------------------------------------|---------------------------------------------------------------------------------------|----------|----------|----------------|----------|----------|
| <i>Salvia albicaulis</i> Benth.                  | 1,2,3) Will and Claßen-Bockhoff 2014.                                                 | KJ584257 | KJ584206 | KJ747274       | /        | /        |
| <i>Salvia albimaculata</i> Hedge and Hub.-Mor.   | Will and Claßen-Bockhoff 2017.                                                        | /        | KU563790 | KU578219       | /        | /        |
| <i>Salvia amethystina</i> Sm.                    | 2) Fragoso-Martinez et al., 2017.                                                     | /        | MF664545 | /              | /        | /        |
| <i>Salvia amplexicaulis</i> Lam.                 | Will and Claßen-Bockhoff 2017.                                                        | /        | KU563829 | KU578151       | /        | /        |
| <i>Salvia anatolica</i> Hamzaog̃lu and Duran     | Will and Claßen-Bockhoff 2017.                                                        | /        | /        | KU563840       | KU578221 | /        |
| <i>Salvia apiana</i> Jeps.                       | 1,4,5) Walker et al., 2015; 2) Walker et al., 2004; 3) Will and Claßen-Bockhoff 2014. | KP852935 | DQ667214 | KJ747321       | KP852890 | KP853066 |
| <i>Salvia aramiensis</i> Rech.f.                 | Will and Claßen-Bockhoff 2017                                                         | /        | KU563791 | KU578247       | /        | /        |
| <i>Salvia arbuscular</i> Fernald                 | 2,4) Jenks et al., 2010                                                               | /        | HQ418846 | /              | HQ418949 | /        |
| <i>Salvia argentea</i> L.                        | Will and Claßen-Bockhoff 2014.                                                        | /        | KJ584164 | KJ747299       | /        | /        |
| <i>Salvia aristate</i> Aucher ex Benth.          | 1) Drew and Sytsma 2011; 2,4) Walker and Sytsma 2007; 5) Drew and Sytsma 2011         | JF301336 | D667280  | /              | DQ667465 | JF289059 |
| <b><i>Salvia aristata</i></b>                    | Iran: Isfahan, TARI (12495).                                                          | MK204889 | /        | /              |          | MK240103 |
| <i>Salvia aspera</i> Fernald.                    | 2,4) Fragoso-Martinez et al., 2017.                                                   | /        | MF664547 | /              | MF663948 | /        |
| <i>Salvia atrocyanea</i> Epling.                 | 2,4) Walker and Sytsma 2007.                                                          | /        | DQ667270 | /              | DQ667456 | /        |
| <b><i>Salvia atropatana</i> Bunge.</b>           | Iran, TARI (88803)                                                                    | MK204887 | MK213193 |                |          | /        |
| <b><i>Salvia atropatana.</i></b>                 | Iran, TARI (29283)                                                                    | MK204888 | /        |                |          | /        |
| <i>Salvia aucheri</i> Benth.                     | 2,4) Walker and Sytsma 2007; Will and Claßen-Bockhoff 2017                            | DQ667286 | KU578248 | DQ667471       | /        |          |
| <i>Salvia aurita</i> L. f.                       | Will and Claßen-Bockhoff 2014.                                                        | KJ584261 | KJ584218 | KJ747276       | /        | /        |
| <i>Salvia austriaca</i> Jacq.                    | 2,4) Walker and Sytsma 2007; 3) Will and Claßen-Bockhoff 2014.                        | /        | DQ667323 | KJ747261       | DQ667512 | /        |
| <i>Salvia axillaris</i> Moc. and Sessé ex Benth. | 1,3,5) Drew and Sytsma 2011.                                                          | JF301330 | MF664549 | JQ669366.<br>1 | MF663950 | JF301330 |
| <i>Salvia azurea</i> Michx. ex Vahl.             | 2,4) Walker and Sytsma 2007.                                                          | /        | DQ667317 | /              | DQ667317 | /        |
| <i>Salvia baimaensis</i> S.W.Su & Z.A.Shen       | specimen_voucher="SBAI                                                                | /        | JQ934103 | /              | /        | /        |
| <i>Salvia ballotiflora</i> Benth.                | 2,4) Jenks et al., 2010.                                                              | /        | HQ418849 | /              | HQ418952 | /        |

|                                                        |                                                   |            |          |          |          |          |
|--------------------------------------------------------|---------------------------------------------------|------------|----------|----------|----------|----------|
| <i>Salvia bariensis</i> Thulin.                        | Will and Claßen-Bockhoff 2014.                    | KJ584262   | /        | KJ747316 | /        | /        |
| <b><i>Salvia bazmanica</i> Rech.f. &amp; Esfand.</b>   | Iran, TARI (43049).                               | MK204886   | /        | /        | /        |          |
| <i>Salvia blepharochlaena</i> Bedge and Hub.-Mor.      | Will and Claßen-Bockhoff 2017.                    | /          | KU578210 | KU578210 | /        | /        |
| <i>Salvia blepharophylla</i> Hedge & Hub.-Mor.         | 2) Jenks et al., 2010.                            | /          | HQ418850 | /        | HQ418953 | /        |
| <i>Salvia brachyantha</i>                              | Will and Claßen-Bockhoff 2017                     | /          | KU563844 | KU578154 | /        | /        |
| <b><i>Salvia brachysiphon</i> Stapf.</b>               | Iran, TARI (3162).                                | MK204885   | MK213194 | /        | /        | MK240104 |
| <b><i>Salvia brachysiphon</i></b>                      | Iran, TARI (1145).                                | MK204884   | MK213195 | /        | /        | MK240105 |
| <b><i>Salvia bracteata</i> Banks &amp; Sol.</b>        | Iran, TARI (16642).                               | MK204883   | /        | /        | /        | MK240107 |
| <i>Salvia brandegeei</i> Munz.                         | 1,2,4,5) Walker and Sytsma 2005.                  | KP852949.1 | KP852783 | /        | KP852896 | KP853067 |
| <i>Salvia breviflora</i> Moc. & Sessé ex Benth.        | 2,4) Fragoso-Martinez et al., 2017.               | /          | MF664551 | /        | MF663952 | /        |
| <i>Salvia brevipes</i> Benth.                          | 2,4) Fragoso-Martinez et al., 2017.               | /          | MF664552 | /        | MF663953 | /        |
| <i>Salvia broussonetii</i> Benth.                      | Will and Claßen-Bockhoff 2014.                    | KJ584263   | KJ584225 | KJ747293 | /        | /        |
| <i>Salvia bucharica</i> M.Popov.                       | Will and Claßen-Bockhoff 2017.                    | /          | KU563794 | KU578222 | /        | /        |
| <i>Salvia bulleyana</i> Diels.                         | Will and Claßen-Bockhoff 2017                     | /          | /        | KU578203 | /        | /        |
| <i>Salvia cabulica</i> Benth.                          | Walker and Sytsma 2007.                           | /          | DQ667287 | /        | DQ667472 | /        |
| <i>Salvia cacaliifolia</i> Epling                      | 2) Jenks et al., 2010; 4) Walker and Sytsma 2007. | /          | HQ418851 | /        | DQ667259 | /        |
| <i>Salvia cadmica</i> Boiss.                           | Will and Claßen-Bockhoff 2017.                    | /          | KU563795 | KU578223 | /        | /        |
| <b><i>Salvia caespitosa</i> Montbret &amp; Aucher.</b> | Iran, TARI (85247).                               | MK204882   | MK213197 | /        | /        | /        |
| <i>Salvia californica</i> Brandegee.                   | Drew and Sytsma 2015.                             | KP852951   | DQ667213 | /        | DQ667424 | KP853068 |
| <i>Salvia candelabrum</i> Boiss.                       | Will and Claßen-Bockhoff 2014.                    | /          | KJ584190 | KJ747255 | /        | /        |
| <i>Salvia candicans</i> M.Martens and Galeotti.        | 2,4) Fragoso-Martinez et al., 2017.               | /          | MF664557 | /        | MF663958 | /        |
| <i>Slavia candidissima</i> Vahl.                       | Walker and Sytsma 2007                            | /          | DQ667261 | /        | DQ667447 |          |
| <i>Salvia carduacea</i> Benth.                         | Walker et al., 2015.                              | /          | KP852785 | /        | KP852900 | KP853069 |
| <i>Salvia carnea</i> Kunth.                            | 2,4) Jenks et al., 2010.                          | /          | HQ418854 | /        | HQ418957 | /        |

|                                                        |                                                                                       |                |          |          |          |          |
|--------------------------------------------------------|---------------------------------------------------------------------------------------|----------------|----------|----------|----------|----------|
| <i>Salvia cassia</i> Sam. ex Rech.f.                   | Will and Claßen-Bockhoff 2017.                                                        | /              | KU563845 | KU578190 | /        | /        |
| <i>Salvia castanea</i> Diels                           | 2) Will and Claßen-Bockhoff 2017; 4) Wang et al., 2013.                               | /              | KU563781 | /        | KC414279 | /        |
| <i>Salvia cavaleriei</i> H.Lév.                        | 1,4) Wang et al., 2013.                                                               |                | KC473232 |          | KC414280 |          |
| <i>Salvia cedrosensis</i> Greene.                      | 1,5) Walker et al., 2015; 2) Walker and Sytsma 2007; 4) Murphy and Bola 2012.         | KP852953       | DQ667228 | /        | JQ888128 | KP853070 |
| <b><i>Salvia ceratophylla</i> L.</b>                   | Iran, TARI, 17238B.                                                                   | MK204881       | MK213198 | /        | /        | MK240107 |
| <i>Salvia chamaedryoides</i> Cav                       | 2) Jenks et al., 2010; 4) Walker et al., 2004                                         | /              | HQ418855 | /        | AY570471 | /        |
| <i>Salvia chamelaeagnea</i> Berg.                      | Will and Claßen-Bockhoff 2014                                                         | KJ584268       | KJ584210 | KJ747289 | /        | /        |
| <i>Salvia chienii</i> E. Peter.                        | Will and Claßen-Bockhoff 2014                                                         | /              | KJ584250 | KJ747322 |          |          |
| <i>Salvia chinensis</i> Benth.                         | PS0121MT04                                                                            | /              | FJ883503 | /        | /        | /        |
| <i>Salvia chionantha</i> Boiss.                        | Will and Claßen-Bockhoff 2017                                                         | /              | KU563846 | KU578155 | /        | /        |
| <i>Salvia chionoeplica</i> Epling.                     | 1,2,3) Will and Claßen-Bockhoff 2014; 4) Walker et al., 2004; 5) Walker et al., 2015. | KJ747318       | KJ584188 | KJ747318 | AY570472 | KP853071 |
| <b><i>Salvia chloroleuca</i> Rech.f. &amp; Aellen.</b> | Iran, TARI (36026).                                                                   | MK204879       | MK212199 | /        | /        | MK240109 |
| <b><i>Salvia chloroleuca.</i></b>                      | Iran, TARI (12691).                                                                   | MK204880       | /        | /        | /        | MK240108 |
| <b><i>Salvia chorassanica</i> Bunge.</b>               | Iran, TARI (5354).                                                                    | MK204878       | MK213200 | /        | /        | MK240110 |
| <i>Salvia chrysophylla</i> Stapf.                      | Will and Claßen-Bockhoff 2017.                                                        | /              | KU563848 | KU578157 | /        | /        |
| <i>Salvia cinnabarina</i> M.Martens and Galeotti.      | 2,4) Fragoso-Martinez et al., 2017.                                                   | /              | MF664559 | /        | MF663960 | /        |
| <i>Salvia clevelandii</i> (A. Gray).                   | 1) JBW 3079; 2,4) Fragoso-Martinez et al., 2017.                                      | KP853032       | MF664560 | /        | MF663961 | /        |
| <i>Salvia clinopodioides</i> Kunth.                    | 2,4) Fragoso-Martinez et al., 2017                                                    | /              | MF664561 | /        | MF663962 | /        |
| <i>Slavia coccinea</i> Buc'hoz ex Etl.                 | 2) Trusty et al., 2004; 4) Wang et al., 2013.                                         | /              | AY506651 | /        | KC414281 | /        |
| <i>Salvia columbariae</i> Benth.                       | 4) Walker et al., 2015                                                                | KP852960.<br>1 | KP852793 | /        | KP852905 | KP853073 |
| <b><i>Salvia compressa</i> Vent.</b>                   | Iran: Hormozgan, TARI (102856)                                                        | MK204877       | MK213201 | /        | /        | /        |
| <i>Salvia concolor</i> Lamb. ex Benth.                 | 2,4) Jenks et al., 2010                                                               | /              | HQ418858 | /        | HQ418961 | /        |

|                                                     |                                                                       |            |          |          |          |          |
|-----------------------------------------------------|-----------------------------------------------------------------------|------------|----------|----------|----------|----------|
| <i>Salvia confertiflora</i> Pohl.                   | 2,4) Jenks et al., 2010.                                              | /          | HQ418859 | /        | HQ418962 | /        |
| <i>Salvia confertispicata</i> .                     | 2,4) Fragoso-Martinez et al., 2017                                    | /          | MF664563 | /        | MF663964 | /        |
| <i>Slavia congestiflora</i> Epling.                 | 2,4) Fragoso-Martinez et al., 2017.                                   | /          | MF664564 | /        | MF663965 | /        |
| <i>Salvia connivens</i> Epling.                     | 2,4) Fragoso-Martinez et al., 2017                                    | /          | MF664565 | /        | MF663966 | /        |
| <i>Salvia corrugata</i> Vahl.                       | 2) Fragoso-Martinez et al., 2017; 4) Walker et al., 2004.             |            | MF622122 |          | AY570476 |          |
| <i>Salvia cuspidata</i> (Benth.) J.R.I.Wood.        | 2,4) Fragoso-Martinez et al., 2017.                                   | /          | MF664568 | /        | MF663970 | /        |
| <i>Salvia cyanescens</i> Boiss. and Bal.            | Will and Claßen-Bockhoff 2017.                                        | /          | KU563849 | KU578158 | /        | /        |
| <i>Salvia cyclostegia</i> E. Peter.                 | 2,4) Wang et al., 2013.                                               | /          | KC473274 | /        | KC414282 |          |
| <i>Salvia cynica</i> Dunn.                          | Walker and Sytsma 2007.                                               | /          | DQ667332 | /        | DQ667521 |          |
| <i>Salvia dabieshanesis</i> J.Q.He.                 | PS1723MT01                                                            |            | FJ883505 | /        | /        | /        |
| <i>Salvia daghestanica</i> Sosn.                    | Walker and Sytsma 2007.                                               | /          | KJ584187 | KJ747308 | DQ667444 | /        |
| <i>Salvia densiflora</i> Benth                      | 2,4) Fragoso-Martinez et al., 2017.                                   | /          | MF664570 | /        | MF663972 | /        |
| <i>Salvia deserta</i> omit.                         | Will and Claßen-Bockhoff 2017.                                        | /          | KJ584176 | KJ747263 |          |          |
| <i>Salvia deserti</i> Decne.                        | 2,3) Will and Claßen-Bockhoff 2014.                                   | KJ584270   | /        | KJ747312 | /        | /        |
| <i>Salvia dianthera</i> Roth ex Room, and Schult.   | 2, 4) Walker and Sytsma 2007; 5) Drew and Sytsma 2011.                | JF301326.1 | DQ667329 | /        | DQ667518 | JF289044 |
| <i>Salvia dichroantha</i> Stapf.                    | Will and Claßen-Bockhoff 2017                                         | /          | KU578159 | KU56830  |          |          |
| <i>Salvia digitaloides</i> Diels.                   | 2) Walker & Sytsma 2007; 4) Walker & Sytsma 2004.                     | /          | /        | DQ667255 | AY570477 | /        |
| <i>Salvia discolor</i> Sessé & Moc.                 | 2,4) Jenks et al., 2010.                                              | /          | HQ418860 | /        | HQ418963 | /        |
| <i>Salvia disermas</i> L.                           | 1,2,3) Will and Claßen-Bockhoff 2014; 4) Walker et al., 2004.         | KJ584271   | KJ584179 | KJ747296 | AY570478 | /        |
| <i>Salvia disjuncta</i> Fernald.                    | 2,3) Will and Claßen-Bockhoff 2017; 4) Fragoso-Martinez et al., 2017. | /          | KU563882 | KU578197 | MF663975 | /        |
| <i>Salvia divaricata</i> Montbret & Auch. ex Benth. | Will and Claßen-Bockhoff 2017                                         | /          | /        | KU578226 | /        | /        |



|                                                        |                                                                                                            |          |          |          |            |          |
|--------------------------------------------------------|------------------------------------------------------------------------------------------------------------|----------|----------|----------|------------|----------|
| <i>Salvia divinorum</i> Epling & Játiva.               | 2,4) JBW 2330                                                                                              | /        | HQ418861 | /        | DQ667440   | /        |
| <i>Salvia dolomitica</i> Codd.                         | 1,3) Will and Claßen-Bockhoff 2014; 2,4) Walker and Sytsma 2007;                                           | KJ584274 | DQ667322 | KJ747290 | DQ667511   | /        |
| <i>Salvia dombeyi</i> Epling.                          | 2,4) Jenks et al., 2010                                                                                    | /        | HQ418862 | /        | HQ418965   | /        |
| <i>Salvia dorisiana</i> Standl.                        | 2,4) Jenks et al., 2010                                                                                    | /        | HQ418863 | /        | HQ418966   | /        |
| <i>Salvia dorrii</i> (Kellogg.) Abrams.                | 1,4,5) Walker et al., 2015; 2) Walker and Sytsma 2007                                                      | KP853037 | DQ667229 | /        | KP852907   | KP853074 |
| <i>Salvia dorystaechas</i> B. T. Drew                  | 2) Will and Claßen-Bockhoff 2014; 3) Drew and Sytsma 2012; 4) Walker et al., 2004; 5) Drew and Sytsma 2011 | KJ584257 | KJ584284 | JQ669302 | AY570454   | JF289014 |
| <b><i>Salvia dracocephaloides</i> Boiss.</b>           | Iran, TARI (30192).                                                                                        | MK204876 | Mk213202 | /        | /          | MK240111 |
| <i>Salvia elegans</i> Vahl.                            | 2,4) Fragoso-Martinez et al., 2017.                                                                        | /        | MF622127 | /        | MF663978   | /        |
| <i>Salvia engelmannii</i> A. Grey.                     | Will and Claßen-Bockhoff 2017                                                                              | /        | KU563870 | Ku578163 | /          | /        |
| <b><i>Salvia eremophila</i> Boiss.</b>                 | Iran, TARI (41741).                                                                                        | MK204875 | /        | /        | /          | MK240112 |
| <i>Salvia eremostachya</i> Jeps.                       | 1,4,5) Walker et al., 2015; 2) Walker and Sytsma 2007.                                                     | KP853039 | DQ667232 | /        | KP852910   | KP853075 |
| <i>Salvia eriophora</i> Boiss. and Kotschy.            | Will and Claßen-Bockhoff 2017                                                                              | /        | KU563850 | KU578167 |            |          |
| <i>Salvia erythrostoma</i> Rusby.                      | Jenks et al., 2010.                                                                                        | /        | HQ418864 | /        | HQ418967   | /        |
| <i>Salvia euphratica</i> Montbret and Aucher ex Benth. | Dizkirici et al., (2015).                                                                                  | /        | KM519756 | KU578227 | KM519770   | /        |
| <i>Salvia evansiana</i> Hand.-Mazz.                    | 2,3) Will and Claßen-Bockhoff 2014; 3) Zhong et al., 2010.                                                 | /        | KJ584251 | KJ747323 | FJ593462.1 | /        |
| <i>Salvia exserta</i> Grieseb.                         | 2,4) Fragoso-Martinez et al., 2017                                                                         | /        | MF622128 | /        | MF663979   | /        |
| <i>Salvia farinacea</i> Benth.                         | 2) Chen et al., 2010; 4) Walker et al., 2004.                                                              | /        | FJ546871 | /        | AY570479   | /        |
| <i>Salvia filifolia</i> Ramamoorthy.                   | 2,4) Fragoso-Martinez et al., 2017.                                                                        | /        | MF664576 | /        | MF663980   | /        |
| <i>Salvia flocculosa</i> Benth.                        | 2,4) Fragoso-Martinez et al., 2017.                                                                        | /        | MF664578 | /        | MF663982   | /        |
| <i>Salvia formosa</i> L'Hér.                           | 2) Fragazo –Martinez et al., 2017.                                                                         | /        | MF622131 | /        | /          | /        |
| <i>Salvia frigida</i> Boiss.                           | Will and Claßen-Bockhoff 2017.                                                                             | /        | KU563851 | KU578168 | /          | /        |
| <i>Salvia fruticosa</i> Miller.                        | Will and Claßen-Bockhoff 2014.                                                                             | /        | KJ584195 | KJ747256 | /          |          |

|                                                                 |                                                                                                        |            |          |          |          |          |
|-----------------------------------------------------------------|--------------------------------------------------------------------------------------------------------|------------|----------|----------|----------|----------|
| <i>Salvia fulgens</i> Cav.                                      | 2) Walker and Sytsma 2007; 4) Benitez-Vieyra et al., 2014.                                             | /          | MF622133 | /        | KJ473988 | /        |
| <i>Salvia funerea</i> M. E. Jones.                              | Walker et al., 2015.                                                                                   | KP853041   | KP852812 | /        | KP852911 | KP853076 |
| <i>Salvia galloana</i> B.L.Turner.                              | 2,4) Fragoso-Martinez et al., 2017.                                                                    | /          | MF664581 | /        | MF663985 | /        |
| <i>Salvia garipensis</i> E.Meyer ex Benth                       | Walker and Sytsma 2007.                                                                                | /          | DQ667281 | /        | DQ667466 | /        |
| <i>Salvia geminata</i> Thulin.                                  | 1) Will and Claßen-Bockhoff 2014.                                                                      | KJ584276   | /        | /        | /        | /        |
| <i>Salvia gesneriiflora</i> Lindl. & Paxton.                    | 2,4) Fragoso-Martinez et al., 2017.                                                                    | /          | MF622133 | /        | MF663986 | /        |
| <i>Salvia glabrescens</i> var. <i>repens</i> (Koidz.) Kurosaki. | Sudarmono and Okada 2007.                                                                              | LC060829.1 | AB295104 | /        | AB295089 | LC060533 |
| <b><i>Salvia glutinosa</i> L.</b>                               | Iran, TARI (21565).                                                                                    | MK204873   | MK213203 | /        | /        | Mk240113 |
| <i>Salvia glutinosa</i> .                                       | 2) Will and Claßen-Bockhoff 2014; 4) Walker et al., 2004; 5) Drew and Sytsma 2011.                     | /          | KU563774 | /        | AY570480 | JF289061 |
| <i>Salvia gracilliramulosa</i> Epling & Játiva.                 | 2.4) Walker and Sytsma 2007.                                                                           | /          | DQ667276 | /        | DQ667461 | /        |
| <i>Salvia gravida</i> A.Gray.                                   | 2,4) Jenks et al., 2010.                                                                               | /          | HQ418868 | /        | HQ418971 | /        |
| <i>Salvia greatae</i> Brandegee.                                | 1,5) Drew and Sytsma 2011; 2) Walker and Sytsma 2007; 3) Drew and Sytsma 2012; 4) Walker et al., 2004. | JF301331   | DQ667215 | JF289062 | AY570481 | JF289062 |
| <i>Salvia greggii</i> A.Gray.                                   | 2,4) Jenks et al., 2010.                                                                               | /          | HQ418870 | /        | HQ418972 | /        |
| <i>Salvia grewiifolia</i> S. Moore.                             | 2,4) Jenks et al., 2010.                                                                               | /          | HQ418871 | /        | HQ418973 | /        |
| <b><i>Salvia grossheimii</i> Sosn.</b>                          | Iran, TARI (84031).                                                                                    | MK204832   | MK213204 | /        | /        | /        |
| <i>Salvia guadalajarensis</i> Briq.                             | 2,4) Fragoso-Martinez et al., 2017.                                                                    | /          | MF664584 | /        | MF663989 | /        |
| <i>Salvia guaranitica</i> Briq.                                 | 2,4) Wang et al., 2013.                                                                                | /          | KC473237 | /        | KC414285 |          |
| <i>Salvia handelii</i> E.Peter.                                 | SHAN                                                                                                   |            | JQ934124 | /        | /        | /        |
| <i>Salvia hayatana</i> Makino ex Hayata.                        | 2,4) Sudarmono and Okada 2007; 5) Takano 2017.                                                         | /          | AB295099 | /        | AB295084 | /        |
| <i>Salvia heerii</i> Regel.                                     | 2,4) Fragoso-Martinez et al., 2017.                                                                    | /          | MF664587 | /        |          | /        |
| <i>Salvia heldreichiana</i> Boiss. ex Benth                     | Will and Claßen-Bockhoff 2017.                                                                         | /          | KU563799 | KU578246 | /        | /        |

|                                                      |                                                                |            |          |          |          |          |
|------------------------------------------------------|----------------------------------------------------------------|------------|----------|----------|----------|----------|
| <i>Salvia henryi</i> Gray.                           | Will and Claßen-Bockhoff 2017.                                 | /          | KU563875 | KU578165 | /        | /        |
| <i>Salvia herbacea</i> Benth.                        | 2,4) Fragoso-Martinez et al., 2017.                            | /          | MF664589 | /        | MF663994 | /        |
| <i>Salvia herbanica</i> A.Santos and M.Ferna´ndez.   | Will and Claßen-Bockhoff 2014.                                 | KJ584278   | KJ584246 | KJ747313 | /        | /        |
| <i>Salvia heterochroa</i> E. Peter.                  | 2,3) Will and Claßen-Bockhoff 2014.                            | /          | KJ584252 | KJ747324 | /        | /        |
| <i>Salvia heterochroa</i> E.Peter.                   | Will and Claßen-Bockhoff 2017                                  | /          | KJ584252 | KJ747324 | /        | /        |
| <i>Salvia heterofolia</i> Epling & Mathias.          | 2,4) Fragoso-Martinez et al., 2017.                            | /          | MF664590 | /        | MF663995 | /        |
| <i>Salvia hians</i> Royle ex Benth.                  | 4) Walker et al., 2004.                                        | /          | DQ763239 | /        | AY570483 | /        |
| <i>Salvia hidalgensis</i> Miranda.                   | 2,4) Fragoso-Martinez et al., 2017.                            | /          | MF664591 | /        | MF663996 | /        |
| <i>Salvia hintonii</i> Epling.                       | 2,4) Fragoso-Martinez et al., 2017.                            | /          | MF664592 | /        | MF663997 | /        |
| <i>Salvia hirtella</i> Vahl                          | 2,4) Walker and Sytsma 2007.                                   | /          | DQ667326 | /        | DQ667515 | /        |
| <i>Salvia hispanica</i> L.                           | 2,4) Fragoso-Martinez et al., 2017.                            | /          | MF664593 | /        | MF663998 | /        |
| <i>Salvia honania</i> L.H.Bailey.                    | PS1722MT01                                                     | /          | FJ883513 | /        | /        | /        |
| <i>Salvia huberi</i> Hedge.                          | Will and Claßen-Bockhoff 2017.                                 | /          | KU563800 | KU578228 | /        | /        |
| <i>Salvia hylocharis</i> Diels                       | Wang et al., 2013.                                             | /          | KC414286 | /        | KC473238 | /        |
| <i>Salvia hypargeia</i> Fisch. and Mey.              | Will and Claßen-Bockhoff 2017.                                 | /          | KU563876 | KU578196 | /        | /        |
| <b><i>Salvia hypochionaea</i> Boiss.</b>             | Iran, TARI (30437).                                            | MK204870   | MK213206 | /        | /        | /        |
| <b><i>Salvia hypoleuca</i> Benth.</b>                | Iran, TARI (54151).                                            | MK204869   | MK213207 | /        | /        | MK240115 |
| <b><i>Salvia indica</i> L.</b>                       | Iran, TARI (90002).                                            | MK204868   | MK213208 | /        | /        | MK240116 |
| <i>Salvia interrupta</i> Schousb.                    | Will and Claßen-Bockhoff 2014.                                 | /          | KJ584191 | KJ747265 | /        |          |
| <i>Salvia isensis</i> Nakai ex Hara.                 | Takano and Akiyama 2017.                                       | LC060831.1 | LC060730 | /        | LC124190 | LC060535 |
| <b><i>Salvia jamzadii</i> Mozaff.</b>                | Iran, TARI (61992).                                            | MK204867   | MK213209 |          |          | MK240117 |
| <i>Salvia japonica</i> f. longipes (Nakai) Sugimoto. | 1,4,5) Sudarmono and Okada (2007); 2) Takano and Akiyama 2017. | LC060835.1 | AB266239 | /        | LC124191 | LC060537 |
| <i>Salvia judaica</i> Boiss.                         | Will and Claßen-Bockhoff 2017.                                 | /          | KJ584241 | KU578160 | /        | /        |
| <i>Salvia jurisicii</i> Kořanin.                     | Will and Claßen-Bockhoff 2017                                  | /          | KU563831 | KU578173 | /        | /        |
| <i>Salvia karwinskii</i> Benth.                      | 2,4) Fragoso-Martinez et al., 2017                             | /          | MF622144 | /        | MF664003 | /        |
| <i>Salvia kiaometiensis</i> H. Lév.                  | 2,4) Wang et al., 2013                                         | /          | KC473239 | /        | KC414287 | /        |

|                                                        |                                                        |            |            |          |          |          |
|--------------------------------------------------------|--------------------------------------------------------|------------|------------|----------|----------|----------|
| <i>Salvia Koyamae</i> Makino.                          | 2,4) Takano and Okada 2011                             |            | AB541114   | AB541142 | /        | LC060540 |
| <i>Salvia kronenburgii</i> Rech. f.                    | Will and Claßen-Bockhoff 2017                          | /          | KM519759   | KU578245 | KM519773 | /        |
| <i>Salvia kurdica</i> Boiss. and Hohen ex Benth. S.    | Will and Claßen-Bockhoff 2017                          | /          | KU563821   | KU578212 | /        | /        |
| <i>Slavia lasiantha</i> Benth.                         | 2,4) Walker and Sytsma 2007.                           | /          | DQ667300   | /        | DQ667486 | /        |
| <b><i>Salvia lachnocalyx</i> Hedge.</b>                | Iran, TARI (83023).                                    | MK204866   | MK213210   |          |          | MK240118 |
| <i>Salvia lachnostachys</i> Benth.                     | 2,4) Fragoso-Martinez et al., 2017                     | /          | MF664598   | /        | MF664005 | /        |
| <i>Salvia lanceolata</i> Lam.                          | 2,3) Will and Claßen-Bockhoff 2014                     | /          | KJ584201   | KJ747277 | /        | /        |
| <i>Salvia leptostachys</i> Benth.                      | 2,4) Fragoso-Martinez et al., 2017                     | /          | MF664603   | /        | MF664010 | /        |
| <b><i>Salvia leriifolia</i> Benth.</b>                 | Iran, TARI (35583).                                    | MK204865   | MK213211   |          |          | /        |
| <i>Salvia leucantha</i> Cav.                           | 2,4) Jenks et al., 2010.                               | /          | HQ418875   | /        | HQ418977 | /        |
| <i>Salvia leucodermis</i> Baker.                       | Will and Claßen-Bockhoff 2014.                         | KJ747280   | KJ584220   | KJ747280 | /        | /        |
| <i>Salvia leucophylla</i> Greene.                      | 2) Walker and Sytsma 2007; 4) Walker et al., 2004      | /          | DQ667210   | /        | KP852913 | KP853077 |
| <b><i>Salvia limbata</i> C.A.Mey.</b>                  | Iran, TARI (27761).                                    | MK204862   | MK213212   | /        | /        | MK240120 |
| <b><i>Salvia limbata</i></b>                           | Iran, TARI (30364).                                    | MK204864   | MK213213   |          |          | Mk24011  |
| <b><i>Salvia limbata</i></b>                           | Iran, TARI (85267).                                    | MK204863   | /          | /        | /        | /        |
| <i>Salvia littae</i> Vis.                              | 2,4) Fragoso-Martinez et al., 2017.                    | /          | MF622150   | /        | MF664014 | /        |
| <i>Salvia longispicata</i> M.Martens & Galeotti.       | 2,4) Jenks et al., 2010.                               | /          | HQ418876   | /        | HQ418978 | /        |
| <i>Salvia lophanthoides</i> Fernald.                   | 2,4) Fragoso-Martinez et al., 2017.                    | /          | MF664607   | /        | MF664017 | /        |
| <i>Salvia lutea</i> L.                                 | Will and Claßen-Bockhoff 2014.                         | KJ747273   | KJ584205   | KJ747273 | /        | /        |
| <i>Salvia lutescens</i> var. <i>lutescens</i> Koidz.   | Takano and Akiyam 2017; 2,4) Sudarmono and Okada 2007. | LC060845.1 | AB266232   | /        | AB266232 | /        |
| <i>Salvia lyrata</i> L.                                | Will and Claßen-Bockhoff 2017.                         | /          | KU563873.1 | KU578166 | /        | /        |
| <b><i>Salvia macilenta</i> Boiss.</b>                  | Iran, TARI (102851).                                   | MK204861   | MK213214   | /        | /        | MK240122 |
| <b><i>Salvia macrochlamys</i> Boiss. &amp; Kotschy</b> | Iran, TARI (102852)                                    | MK204860   | MK213215   | /        | /        | MK240123 |
| <i>Salvia macrophylla</i> Bent.                        | 2,4) Jenks et al., 2010.                               | /          | HQ418877   | /        | HQ418979 |          |

|                                                              |                                                                                                |          |            |          |          |          |
|--------------------------------------------------------------|------------------------------------------------------------------------------------------------|----------|------------|----------|----------|----------|
| <b><i>Salvia macrosiphon</i> Boiss.</b>                      | Iran, TARI (58399).                                                                            | MK204859 | MK213216   | /        | /        | MK240124 |
| <i>Salvia madrensis</i> Seem.                                | 2,4) Jenks et al., 2010.                                                                       | /        | HQ418878   | /        | HQ418980 | /        |
| <b><i>Salvia majdae</i> (Rech.f. &amp; Wendelbo) Sytsma.</b> | Iran: Hormozgan, Geno mountain, Mirtajzadin 201.                                               | MK204858 | MK256967   | /        | /        | 1/       |
| <i>Salvia marashica</i> Ilçim, Celep and Dogan.              | Will and Claßen-Bockhoff 2017.                                                                 | /        | KU563802   | KU578230 | /        | /        |
| <i>Salvia margaritae</i> Botsch.                             | 2,3) Will and Claßen-Bockhoff 2017.                                                            | KU563880 | /          | KU578201 | /        | /        |
| <i>Salvia maximowicziana</i> Hemsl.                          | 1,3,4) Deng et al., 2015.                                                                      | KM886617 | PS1730MT01 | KM886851 | KM886650 |          |
| <i>Salvia maymanica</i> Hedge.                               | Will and Claßen-Bockhoff 2017.                                                                 | /        | KU563805   | KU578231 | /        | /        |
| <i>Salvia meilienis</i> S.W.Su.                              | PS1719MT01                                                                                     | /        | FJ546867   | /        | /        | /        |
| <i>Salvia mellifera</i> E. Greene.                           | 1,4) Walker et al., 2015; 2) Jenks et al., 2011; 3) Drew and Sytsma 2012; 5) Drew et al., 2011 | KP852989 | HQ418879   | JQ669368 | KP852916 | JF289064 |
| <i>Salvia merjamie</i> Forsk.                                | Will and Claßen-Bockhoff 2014.                                                                 | KJ584286 | KJ584184   | KJ747297 | /        | /        |
| <i>Salvia mexicana</i> L.                                    | 2,4) I. Fragoso-Martinez 79 (FCME).                                                            | /        | MF664611   | /        | MF664021 | /        |
| <i>Salvia microphylla</i> Kunth                              | 2,4) Fragoso-Martinez et al., 2017.                                                            | /        | MF664022   | /        | MF663986 | /        |
| <b><i>Salvia microstegia</i> Boiss. &amp; Balansa</b>        | Iran, TARI (5397).                                                                             | MK204857 | MK213216   | /        | /        | /        |
| <i>Salvia minarum</i> Briq.                                  | 2,4) Fragoso-Martinez et al., 2017                                                             | /        | MF664613   | /        | MF664023 | /        |
| <b><i>Salvia mirzayanii</i> Rech.f. &amp; Esfand.</b>        | Iran, TARI (41724).                                                                            | MK204856 | MK213217   | /        | /        | /        |
| <i>Salvia misella</i> Kunth.                                 | 2,4) Fragoso-Martinez et al., 2017                                                             | /        | MF664614   | /        | /        | /        |
| <i>Salvia mocinoi</i> Benth.                                 | 2) Fragoso-Martinez et al., 2017; 4) Walker and Sytsma 2007                                    | /        | MF664615   | /        | DQ667459 | /        |
| <i>Salvia modesta</i> Boiss.                                 | Will and Claßen-Bockhoff 2017                                                                  | /        | KU563856   | KU578175 | /        | /        |
| <i>Salvia mohavensis</i> E. Greene.                          | 2) Walker and Sytsma 2007; 1,4,5) Walker et al., 2015                                          | KP852997 | DQ667212   | /        | KP852920 | KP853078 |
| <i>Salvia moniliformis</i> Fernald.                          | 2,3) Will and Claßen-Bockhoff 2017                                                             | /        | KU563884   | KU578198 | /        | /        |
| <i>Salvia montbretii</i> Benth.                              | Will and Claßen-Bockhoff 2017                                                                  | /        | KU563869   | KU578195 | /        | /        |

|                                                       |                                                                                        |            |          |          |          |          |
|-------------------------------------------------------|----------------------------------------------------------------------------------------|------------|----------|----------|----------|----------|
| <i>Salvia muirii</i> L.Bolus.                         | Will and Claßen-Bockhoff 2014.                                                         | KJ584287   | KL584208 | KJ747283 | /        | /        |
| <b><i>Salvia multicaulis</i> Vahl.</b>                | Iran, TARI (102845)                                                                    | /          | MK213218 | /        | /        | /        |
| <i>Salvia munzii</i> Epling.                          | 2) Walker and Sytsma 2007; 1,5) Walker et al., 2015; 4) Fragoso-Martinez et al., 2017. | KP853000   | DQ667224 | /        | MF664026 | KP853079 |
| <i>Salvia namaensis</i> Schinz.                       | Will and Claßen-Bockhoff 2014.                                                         | KJ584289   | KJ584200 | KJ747284 | /        | /        |
| <i>Salvia nana</i> Kunth.                             | 2,4) Fragoso-Martinez et al., 2017                                                     | /          | MF664618 | /        | MF664029 | /        |
| <b><i>Salvia nemorosa</i> L.</b>                      | Iran, TARI (43572)                                                                     | MK204855   | MK213219 | /        | /        | MK240125 |
| <i>Salvia nervosa</i> Benth.                          | 2,4) Fragoso-Martinez et al., 2017.                                                    | /          | MF664619 | /        | MF664031 | /        |
| <i>Salvia nilotica</i> Juss. ex Jacq.                 | 1,2,3) Will and Claßen-Bockhoff 2014; 4) Walker and Sytsma 2004                        | KJ747281   | KJ584229 | KJ747258 | AY570487 | /        |
| <i>Salvia nipponica</i> Miq. var. <i>kisoensis</i>    | 1,5) Takano and Akiyam 2017; 2) Takano and Okada 2011                                  | LC060848   | AB295101 | /        | /        | LC060552 |
| <i>Salvia nitida</i> (M.Martens & Galeotti) Benth.    | 2,4) Fragoso-Martinez et al., 2017                                                     | /          | MF664620 | /        | MF664032 | /        |
| <i>Salvia nubicola</i> Wall. ex Sweet                 | 2,4) Will and Claßen-Bockhoff 2017                                                     |            | KU563786 | KU578205 | /        | /        |
| <i>Salvia nutans</i> L.                               | Will and Claßen-Bockhoff 2017                                                          | /          | KU563832 | KU578176 | /        | /        |
| <i>Salvia nydeggeri</i> Hub.-Mor.                     | Will and Claßen-Bockhoff 2017                                                          | /          | KU563803 | KU578233 | /        | /        |
| <i>Salvia oaxacana</i> Fernald.                       | 3) Will and Bockhoff 2017.                                                             | /          | /        | KU578199 | HQ418983 | /        |
| <i>Salvia occidentalis</i> Sw.                        | 2,4) Jenks et al., 2010.                                                               | /          | HQ418882 | /        | HQ418984 | /        |
| <i>Salvia officinalis</i> L.                          | 1, 4, 5) Drew and Sytsma 2011; 2) Walker and Sytsma 2007                               | JF301332   | DQ667225 |          | JF301398 | JF289065 |
| <b><i>Salvia oligophylla</i> Aucher ex Benth.</b>     | Iran: Zanjan, Mirtajzadini                                                             | MK204853   | MK256968 |          |          | MK240126 |
| <i>Salvia omeiana</i> E. Peter.                       | Voucher: SOME                                                                          | /          | JQ934139 | EU200176 | /        | /        |
| <i>Salvia omerocalyx</i> Hayata var <i>omerocalyx</i> | 1,5) Takano 2017; 2,4) Takano and Okada 2011                                           | LC060852.1 | AB353205 | /        | AB353195 | LC060557 |
| <i>Salvia oppositiflora</i> Ruiz & Pav.               | 2,4) Jenks et al., 2010                                                                | /          | HQ418883 | /        | HQ418985 | /        |

|                                                           |                                                                                                     |            |          |          |          |          |
|-----------------------------------------------------------|-----------------------------------------------------------------------------------------------------|------------|----------|----------|----------|----------|
| <i>Salvia orbignaei</i> Benth.                            | 2) Fragoso-Martinez et al., 2017; 4) Walker and Sytsma 2007                                         | /          | DQ667279 | /        | MF664033 | /        |
| <i>Salvia ovalifolia</i> A.St.-Hil. ex Benth.             | 4) Walker and Sytsma 2007                                                                           | /          | DQ667315 | /        | DQ667502 | /        |
| <i>Salvia oxyphora</i> Briq.                              | 2,4) Jenks et al., 2010                                                                             | /          | HQ418884 | /        | HQ418986 | /        |
| <i>Salvia pachyphylla</i> Munz.                           | 1,5) Walker et al., 2015; 2) Walker and Sytsma 2007                                                 | KP853004   | /        | /        | DQ667431 | KP853080 |
| <i>Salvia palaestina</i> Benth.                           | Will and Claßen-Bockhoff 2014                                                                       | /          | KJ584175 | KJ74304  | /        | /        |
| <i>Salvia pallida</i> Benth.                              | 2,4) Fragoso-Martinez et al., 2017                                                                  | /          | MF664623 | /        | MF664035 | /        |
| <i>Salvia paohsingensis</i> C.Y.Wu.                       | 2,4) Wang et al., 2013                                                                              | /          | KC473252 | /        | KC414297 | /        |
| <i>Salvia patens</i> Cav.                                 | 1,5) Drew and Sytsma 2011; 2) Jenks et al. 2010; 3) Drew and Sytsma 2012; 4) Walker and Sytsma 2007 | JF301333   | HQ418885 | JQ669370 | DQ667442 | JF289066 |
| <i>Salvia pauciflora</i> Kunth.                           | 2,4) Wang et al., 2013.                                                                             | /          | KC473254 | /        | KC414299 | /        |
| <i>Salviapentstemenoides</i> K.Koch and C.D.Bouché.       | 3) Will and Claßen-Bockhoff 2014; 2,4) Walker and Sytsma 2007.                                      | /          | DQ667221 | KU578162 | AY570489 | /        |
| <i>Salvia perlonga</i> Fernald.                           | 2,4) Fragoso-Martinez et al., 2017.                                                                 | /          | MF664627 | /        | MF664040 | /        |
| <i>Salvia personata</i> Epling.                           | 2,4) Walker and Sytsma 2007.                                                                        | /          | DQ667269 | /        | DQ667455 | /        |
| <b><i>Salvia persopolitana</i> Boiss.</b>                 | Iran, TARI (102854).                                                                                | MK204852   | MK213220 |          |          | MK240127 |
| <i>Salvia phlomoides</i> Asso.                            | Will and Bockhof 2014.                                                                              | /          | KJ584186 | KJ747309 | /        | /        |
| <i>Salvia pinnata</i> L.                                  | Will and Claßen-Bockhoff 2017.                                                                      | /          | KU563798 | KU578217 | /        | /        |
| <i>Salvia platystoma</i>                                  | 2,4) Walker and Sytsma 2007.                                                                        | /          | DQ667277 | /        | DQ667462 | /        |
| <i>Salvia plebeia</i> R.Br.                               | 1,5) Takano 2017; 2) Will and Claßen-Bockhoff 2017; 3) Wang et al., 2013.                           | LC060859.1 | KU563788 | /        | KC414300 | LC060563 |
| <i>Salvia plectranthoides</i> Griff.                      | 2,3) Will and Claßen-Bockhoff 2017.                                                                 | /          | KU563787 | KU578207 | /        | /        |
| <b><i>Salvia poculata</i> Nábelek.</b>                    | Iran, TARI (102848).                                                                                | MK204851   | MK213221 | /        | /        | /        |
| <i>Salvia polystachya</i> Cav.                            | 1,5) Drew and Sytsma 2011; 2,4) Fragoso-Martinez et al., 2017; 3) Drew and Sytsma 2012.             | JF301334   | MF664631 | JQ669371 | MF664044 | JF289067 |
| <i>Salvia potentillifolia</i> Boiss. and Heldr. ex Benth. | Will and Claßen-Bockhoff 2017.                                                                      | /          | KU563807 | KU578235 | /        | /        |
| <i>Salvia pratensis</i> L.                                | Will and Claßen-Bockhoff 2017.                                                                      | /          | KU563835 | KU578180 | /        | /        |

|                                             |                                                                                       |            |          |          |          |          |
|---------------------------------------------|---------------------------------------------------------------------------------------|------------|----------|----------|----------|----------|
| <i>Salvia prattii</i> Hemsl.                | 2,3) Will and Claßen-Bockhoff 2017.                                                   | /          | KU578206 | /        | KU563784 | /        |
| <i>Salvia priontis</i> Hance.               | specimen_voucher="PS1711MT01                                                          | /          | FJ883527 | /        | /        | /        |
| <i>Salvia procurrens</i> Benth.             | 2,4) Fragoso-Martinez et al., 2017.                                                   | /          | MF664633 | /        | MF664046 | /        |
| <i>Salvia prunelloides</i> Kunth.           | 2) Walker and Sytsma 2007; 4) Fragoso-Martinez et al., 2017.                          | /          | DQ667275 | /        | MF664048 | /        |
| <i>Salvia przewalskii</i> Maxim.            | 1,5) Drew and Sytsma 2011; 2,4) Walker and Sytsma 2007; 3) Drew and Sytsma 2012.      | JF301339.1 | DQ667254 | JQ669372 | DQ667443 | JF289068 |
| <i>Salvia pterocalyx</i> Hedge.             | 3) Will and Claßen-Bockhoff 2017.                                                     | /          | /        | KU578200 | /        | /        |
| <i>Salvia pubescens</i> Benth.              | 2,4) Walker and Sytsma 2007.                                                          | /          | DQ667296 | /        | DQ667482 | /        |
| <i>Salvia purpurea</i> Sessé & Moc.         | 2,4) Benitez-Vieyra et al., 2014.                                                     | /          | MF664636 | /        | KJ473981 | /        |
| <i>Salvia pygmaea</i> Matsum.               | 1, 5) Takano and Akiyama 2017; 2) Takano and Okada 2011; 4) Sudarmono and Okada 2007. | LC060854.1 | AB541126 | /        | AB295083 | LC060558 |
| <i>Salvia qimenensis</i> S.W.Su & J.Q.He.   | specimen_voucher="SQIM"                                                               | /          | JQ934155 | /        | /        | /        |
| <i>Salvia quezelii</i> Hedge and Afzal-Rafi | Will and Claßen-Bockhoff 2017.                                                        | /          | KU563808 | KU578249 | /        | /        |
| <i>Salvia radula</i> Benth.                 | 1,2) Will and Claßen-Bockhoff 2014.                                                   | KJ584293   | KJ584180 | /        | /        | /        |
| <i>Salvia ranzianiana</i> Makino.           | 2,4) Sudarmono and Okada (2007); 5) Takano 2017.                                      | /          | AB287375 | /        | AB287374 | LC060560 |
| <i>Salvia repens</i> Burch. ex Benth.       | Will and Claßen-Bockhoff 2014.                                                        | KJ584295   | KJ584231 | KJ747282 | /        | /        |
| <i>Salvia retinervia</i> Briq.              | 2,4) Fragoso-Martinez et al., 2017                                                    | /          | MF664058 | /        | MF664058 | /        |
| <b><i>Salvia reuterana</i> Boiss.</b>       | Iran, TARI (102849).                                                                  | MK204850   | MK213222 | /        | /        |          |
| <b><i>Salvia reuterana</i>.</b>             | Iran, TARI (102842).                                                                  | MK204849   | /        | /        | /        | /        |
| <b><i>Salvia rhytidea</i> Benth.</b>        | Iran, TARI, (102850).                                                                 | MK204848   | MK213223 | /        | /        | MK240129 |
| <b><i>Salvia rhytidea</i>.</b>              | Iran, Bahonar University (16297).                                                     | MK204847   | /        | /        | /        | MK240128 |
| <i>Salvia ringens</i> Sm.                   | Will and Claßen-Bockhoff 2017.                                                        | /          | KU563810 | KU578213 | /        | /        |
| <i>Salvia roborowskii</i> Maxim.            | 2)Walker and Sytsma 2007.                                                             | /          | DQ667289 | /        | DQ667474 | /        |
| <i>Salvia roemeriana</i> Scheele.           | 1,5) Drew and Sytsma 2011; 2) walker and Sytsma 2007.                                 | JF301340   | DQ667211 | /        | /        | /        |



|                                                              |                                                                                                   |          |               |          |          |            |
|--------------------------------------------------------------|---------------------------------------------------------------------------------------------------|----------|---------------|----------|----------|------------|
| <i>Salvia rosifolia</i> Sm.                                  | Will and Claßen-Bockhoff 2017                                                                     | /        | KU578209      | /        | /        | /          |
| <i>Salvia rosmarinus</i> (L.) Schield.,<br>Handb. Med.-Pharm | 1,5) Drew and Sytsma 2011; 2) Trusty et al. 2004; 3) Drew and Sytsma 2012 4) Walker et al., 2004. | JF30328  | AY506649      | JQ669364 | AY570465 | JF289058.1 |
| <i>Salvia rufula</i> Kunth.                                  | 2,4) Fragoso-Martinez et al., 2017.                                                               | /        | MF622179      | /        | MF664063 | /          |
| <i>Salvia rugosa</i>                                         | 2,5) Walker & Sytsma 2007                                                                         | /        | DQ667290      | /        | DQ667475 | /          |
| <i>Salvia rusbyi</i> Britton ex Rusby.                       | 2,4) Walker and Sytsma 2007.                                                                      | /        | DQ667266      | /        | DQ667452 | /          |
| <b><i>Salvia russellii</i> Benth.</b>                        | Iran, TARI (86040).                                                                               | MK204846 | MK213224      | /        | /        | MK240130   |
| <i>Salvia rypara</i> Briq.                                   | 2,4) Walker and Sytsma 2007.                                                                      | /        | DQ667266      | /        | DQ667452 | /          |
| <i>Salvia rzedowskii</i><br>Ramamoorthy                      | 2,4) Fragoso-Martinez et al., 2017.                                                               | /        | MF664650      | /        | MF664067 | /          |
| <i>Salvia sagittata</i> Ruiz & Pav.                          | 2,4) Walker and Sytsma 2007.                                                                      | /        | DQ667446      | /        | DQ667260 | /          |
| <b><i>Salvia sahendica</i> Boiss. &amp; Buhse</b>            | Iran, TARI (73990).                                                                               | MK204845 | MK213225      | /        | /        | /          |
| <b><i>Salvia santalonifolia</i> Boiss.</b>                   | Iran, TARI (102846).                                                                              | MK204844 | MK213226      | /        | /        | /          |
| <i>Salvia scabiosifolia</i> Lam.                             | Will and Claßen-Bockhoff 2017                                                                     | /        | KU563811      | KU578237 | /        | /          |
| <i>Salvia scabra</i> L.                                      | Will and Claßen-Bockhoff (2014)                                                                   | KJ584297 | KJ584233      | KJ747285 | /        | /          |
| <i>Salvia scapiformis</i> Hance                              | 2,4) Deng et al., 2015                                                                            |          | KM886675<br>1 |          | KM886852 |            |
| <i>Salvia schimperi</i> Benth.                               | Will and Claßen-Bockhoff 2014                                                                     | KJ584298 | KJ584174      | /        | /        | /          |
| <i>Salvia schlechteri</i> Briq,                              | Will and Claßen-Bockhoff 2014                                                                     | KJ584299 | KJ584235      | KJ747286 | /        | /          |
| <i>Salvia sclarea</i> L.                                     | 2) Walker and Sytsma 2007; 3,5) Drew and Sytsma 2012                                              | /        | DQ667222      | JQ669373 | /        | JQ669265   |
| <b><i>Salvia sclarea</i>.</b>                                | Iran, TARI (69493).                                                                               | MK204843 | MK213227      | /        | /        | MK240131   |
| <b><i>Salvia sclareopsis</i> Bornm. ex Hedge</b>             | Iran, TARI (3533).                                                                                | MK204842 | MK213228      | /        | /        | MK240131   |
| <i>Salvia scrophularifolia</i> (Bunge)<br>B. T. Drew         | 2,4) Walker and Sytsma 2007; 3) Drew and Sytsma 2012; 5) Drew and Sytsma 2011                     | /        | DQ667330      | JQ669352 | DQ667519 | JF289051   |
| <i>Salvia scutellaroides</i> Kunth.                          | 2,4) Walker and Sytsma 2007                                                                       | /        | DQ667327      |          | DQ667516 |            |

|                                                                   |                                                                       |          |          |          |          |          |
|-------------------------------------------------------------------|-----------------------------------------------------------------------|----------|----------|----------|----------|----------|
| <i>Salvia sericeo-tomentosa</i> Rech. F.                          | Will and Claßen-Bockhoff 2017                                         | /        | KU563822 | KU578238 | /        | /        |
| <i>Salvia sessei</i> Benth.                                       | 2,4) Jenks et al., 2010                                               | /        | HQ418889 | /        | HQ418991 | /        |
| <i>Salvia sessilifolia</i> Baker.                                 | 3) Walker and Sytsma 2007;                                            | KJ584303 | DQ667282 | DQ667467 | /        | /        |
| <i>Salvia sinica</i> Migo.                                        | SS201301                                                              | /        | KJ397257 | /        | /        | /        |
| <i>Salvia somalensis</i> Vatke.                                   | Will and Claßen-Bockhoff 2014                                         | KJ584304 | KJ584240 | KJ747311 | /        | /        |
| <i>Salvia sonomensis</i> E. Greene.                               | 1,4) Walker and Sytsma 2007; 2,5) Walker et al., 2015                 | KP853008 | DQ667218 | /        | DQ667426 | KP853081 |
| <i>Salvia sophrona</i> Briq.                                      | 2,4) Fragoso-Martinez et al., 2017                                    | /        | MF664655 | /        | MF664073 | /        |
| <b><i>Salvia spinosa</i> L.</b>                                   | Iran, TARI (102844)                                                   | MK204841 | MK213229 | /        | /        | MK240132 |
| <b><i>Salvia spiraeifolia</i> Boiss. &amp; Hohen.</b>             | Iran, TARI (1506)                                                     | MK204872 | MK21204  |          |          | /        |
| <i>Salvia splendens</i> Sellow ex Schult.                         | 2,4) Fragoso-Martinez et al., 2017                                    | /        | MF622186 | /        | MF664076 | /        |
| <i>Salvia stachydifolia</i> Benth.                                | 2,4) Walker and Sytsma 2007                                           | /        | DQ667267 | /        | DQ667453 | /        |
| <b><i>Salvia staminea</i> Montbret &amp; Aucher ex Benth.</b>     | Iran, TARI (51624)                                                    | MK204840 | MK213230 | /        | /        | /        |
| <i>Salvia stenophylla</i> Burch. ex Benth.                        | Will and Claßen-Bockhoff 2014                                         | KJ584305 | KJ584237 | KJ747260 | /        | /        |
| <i>Salvia styphelus</i> Epling                                    | 4) Jenks et al., 2010                                                 | /        | HQ418891 | /        | HQ418993 | /        |
| <b><i>Salvia suffruticosa</i> Montbret &amp; Aucher ex Benth.</b> | Iran, TARI (86522)                                                    |          | MK213223 |          |          |          |
| <i>Salvia summa</i> A.Nelson.                                     | 1) Will and Claßen-Bockhoff 2014; 2,3) Will and Claßen-Bockhoff 2017. | KJ584307 | KU563874 | KU578164 | /        | /        |
| <i>Salvia superba</i>                                             | voucher="PS0134MT01                                                   | /        | FJ546849 | /        | /        |          |
| <b><i>Salvia syriaca</i> L.</b>                                   | Iran, TARI (16699).                                                   | MK204839 | MK213232 | /        | /        | /        |
| <i>Salvia</i> × <i>sylvestris</i> L.                              | 2) Will and Claßen-Bockhoff 2017; 3,4) Wang et al., 2013.             | /        | KJ584177 | KJ747292 | KC414323 | /        |
| <i>Salvia taraxacifolia</i> Hook.f.                               | 1,2,3) Will and Claßen-Bockhoff 2014; Walker et al., 2004.            | KJ584308 | KJ584228 | KJ747270 | AY570497 | /        |
| <b><i>Salvia tebesana</i> Bunge.</b>                              | Iran, TARI (84759).                                                   | MK204838 | MK213233 | /        | /        | /        |
| <i>Salvia texana</i> (Scheele) Torr.                              | Will and Claßen-Bockhoff 2017.                                        | /        | KJ584199 | KJ747267 | DQ667510 | /        |

|                                                                           |                                                         |          |          |          |            |          |
|---------------------------------------------------------------------------|---------------------------------------------------------|----------|----------|----------|------------|----------|
| <i>Salvia thermarum</i> Van Jaarsv.                                       | P. Wester and R. Claßen-Bockhoff 336 (MJG 041398).      | KJ584309 | /        | KJ747288 | /          | /        |
| <i>Salvia thymoides</i> Benth                                             | 2,4) Walker and Sytsma 2007.                            | /        | DQ667273 | /        | DQ667458   | /        |
| <i>Salvia thyriflora</i> Benth.                                           | 2,4) Fragoso-Martinez et al., 2017.                     | /        | MF664668 | /        | MF664088   | /        |
| <i>Salvia tiliifolia</i> Vahl.                                            | 2,4) Fragoso-Martinez et al., 2017.                     | /        | MF664669 | /        | MF664089   | /        |
| <i>Salvia tobeyi</i> Hedge.                                               | Will and Claßen-Bockhoff 2017.                          | /        | KU563865 | KU578188 | /          | /        |
| <i>Salvia tomentosa</i> Mill.                                             | Will and Claßen-Bockhoff 2017.                          | /        | KU563816 | KU578214 | /          | /        |
| <i>Salvia tonaticensis</i><br>Ramamoorthy ex Lara,<br>Bedolla et Zamudio. | 2,4) Fragoso-Martinez et al., 2017.                     | /        | MF664670 | /        | MF664090   | /        |
| <i>Salvia tortuosa</i> Urb.                                               | 2,4) Jenks et al., 2010.                                | /        | HQ418893 | /        | HQ418995   | /        |
| <i>Salvia trichocalycina</i> Benth.                                       | Walker & Sytsma 2007                                    | /        | DQ667283 | /        | DQ667468   | /        |
| <i>Salvia trichoclada</i> Benth.                                          | Will and Claßen-Bockhoff 2017.                          | /        | /        | KU578243 | /          | /        |
| <i>Salvia trichostephna</i> Epling.                                       | 2,4) Fragoso-Martinez et al., 2017.                     | /        | MF664671 | /        | MF664091   | /        |
| <i>Salvia tricuspis</i> Franch.                                           | China: Sichuan                                          | /        | EF373633 | /        | EU220730   | /        |
| <i>Salvia trijuga</i> Diels.                                              | 2) Will and Claßen-Bockhoff 2017; 4)<br>Wang et al 2013 | /        | KU563779 | /        | KC414322.1 | /        |
| <i>Salvia tubifera</i> Cav.                                               | 2,4) Fragoso-Martinez et al., 2017.                     | /        | HQ418894 | /        | HQ418996   | /        |
| <i>Salvia tubiflora</i> Sm.                                               | 2,4) Fragoso-Martinez et al., 2017.                     | /        | MF664672 | /        | MF664092   | /        |
| <i>Salvia uliginosa</i> Benth.                                            | 2,4) Jenks et al., 2010.                                | /        | HQ418895 | /        | HQ418997   | /        |
| <b>Salvia urmiensis</b> Bunge.                                            | Iran, TARI (19586).                                     | MK204837 | MK213234 | /        | /          | /        |
| <i>Salvia vaseyi</i> (Porter) Parish.                                     | 4)Walker et al., 2015.                                  | KP853013 | /        | /        | KP852932   | KP853083 |
| <i>Salvia veneris</i> Hedge                                               | Will and Claßen-Bockhoff 2017.                          | /        | KJ584170 | KJ747306 | /          | /        |
| <i>Salvia venulosa</i> Epling                                             | 2,4) Jenks et al., 2010.                                | /        | HQ418896 | /        | HQ418998   | /        |
| <b>Salvia verbascifolia</b> M.Bieb.                                       | Iran, TARI (88803).                                     | MK204831 | MK213235 | /        | /          | /        |
| <i>Salvia verbenaca</i> L.                                                | Will and Claßen-Bockhoff 2014.                          | /        | KJ584183 | KJ747298 | /          | /        |
| <i>Salvia vermifolia</i> Bedge and<br>Huber-Morath.                       | Will and Claßen-Bockhoff 2017.                          | /        | Ku563866 | KU578192 | /          | /        |
| <b>Salvia verticillata</b> L.                                             | Iran, TARI (2765).                                      | MK204836 | MK213236 | /        | /          | /        |
| <b>Salvia virgata</b> Jacq.                                               | Iran, TARI (3772).                                      | MK204835 | MK213237 | /        | /          | /        |

|                                             |                                                                                         |          |          |          |          |           |
|---------------------------------------------|-----------------------------------------------------------------------------------------|----------|----------|----------|----------|-----------|
| <i>Salvia viridis</i> L.                    | Iran, TARI (13283).                                                                     | MK204834 | MK213238 | /        | /        | MK240135  |
| <i>Salvia viscosa</i> Jacq.                 | Will and Claßen-Bockhoff 2017.                                                          | /        | KU563838 | KU578186 | /        | /         |
| <i>Salvia vvedenskii</i> Nikitina .         | 2,3) Will and Claßen-Bockhoff 2017.                                                     | /        | KU563879 | KU578202 | /        | /         |
| <i>Salvia whitehousei</i> Alziar            | 1,2,3) Will and Claßen-Bockhoff 2014; 4) Walker and Sytsma 2007.                        | KJ584311 | KJ584198 | KJ747268 | DQ667509 | /         |
| <i>Salvia xanthocheila</i> Boiss. ex Benth. | Iran, TARI (69728).                                                                     | MK204833 | MK213239 | /        | /        | MK240136  |
| <i>Salvia yangii</i> B. T. Drew             | 1,5) Drew and Sytsma 2011; 2) Will and Claßen-Bockhoff (2014); 3) Drew and Sytsma 2011. | JF301328 | KJ584242 | JQ669352 |          | JF289051` |
| <i>Salvia yunnanensis</i> C.H.Wright.       | 2) YunN0309-2; 3) G.X. Hu & al., QT001, 4) H.F. Guo 2017257(PE)                         | /        | DQ132866 | KT210283 | EF014356 |           |

**Table 2:** Rate and modes of *Salvia* corolla length diversification. Fitted models are Brownian motion (BM), Ornstein-Uhlenbeck (OU) and Early Burst (EB). The best-fit model is estimated based on the lowest bias-corrected Akaike Information Criterion.

| <b>Model</b> | <b>Model Parameters</b> | <b>LogL</b>  | <b>AICc</b> | <b><math>\Delta</math>AIC</b> |
|--------------|-------------------------|--------------|-------------|-------------------------------|
| BM           | $\alpha = 0$            | -1233        | 2470        | 68                            |
| OU           | $\alpha = 0.15$         | -1198.020364 | 2402        | 0                             |
| EB           | $\alpha = -0.00001$     | -1233.21     | 2472        | 70                            |

**Table 3:** Rates of *Salvia* diversification examining multiple evolutionary models. Models fitted include diversity-dependent linear speciation and extinction (DDL + E), diversity-dependent exponential speciation and extinction (DDE+E) and two constant-rate diversification models: a pure-birth (Yule) model and birth-death (crBD) model.  $\lambda$  = speciation rate (Ma/lineage);  $\mu$  = extinction rate (Ma/lineage);  $K$  = carrying capacity; AIC = Akaike Information Criterion (AIC) for testing model fit. The capacity for the potential number of *Salvia* species is higher than the number of extant species (~1000 spp.), suggesting that current *Salvia* diversification is independent of diversity.

| Model | lambda | mu      | K       | loglik    | AIC      |
|-------|--------|---------|---------|-----------|----------|
| Yule  | 0.246  | 0       | -----   | -989.739  | 1977.782 |
| CrBD  | 0.290  | 0.079   | -----   | -987.888  | 1979.768 |
| DDE+E | 0.6682 | 0.2331  | 36504.2 | -993.5864 | 1993.169 |
| DDS+E | 0.3579 | 0.14616 | 3315.75 | -988.042  | 1982.86  |

**Table 4:** HiSSE model subsets that were fitted for study of the effect of the lever mechanism on diversification across *Salvia* phylogeny. The best-fit model shown in bold was selected based on a bias-corrected Akaike Information Criterion (AICc).

| Active lever mechanism                                                                                                                      |                |                 |              |
|---------------------------------------------------------------------------------------------------------------------------------------------|----------------|-----------------|--------------|
| Model                                                                                                                                       | lnLik          | AIC             | $\Delta$ AIC |
| CID-4: q's equal                                                                                                                            | -948.8211      | 1915.642        | 77.136       |
| HiSSE: $\tau_{0A}=\tau_{1A}$ , $\epsilon_{0A}=\epsilon_{1A}$ , $q_{0B1B}=0$ , $q_{1B0B}=0$ , All other q's equal                            | -909.27        | 1828.541        | 16.943       |
| HiSSE: $\epsilon$ 's equal, $q_{0B1B}=0$ , $q_{1B0B}=0$ , All other q's equal                                                               | -907.778       | 1825.556        | 18.575       |
| <b>HiSSE: <math>q_{0B1B}=0</math>, <math>q_{1B0B}=0</math>, All other q's equal</b>                                                         | <b>-899.79</b> | <b>1811.598</b> | <b>0</b>     |
| HiSSE: $\tau_{0A}=\tau_{1A}$ , $\epsilon$ 's equal, $q_{0B1B}=0$ , $q_{1B0B}=0$ , All other q's equal                                       | -906.91        | 1827.827        | 16.229       |
| HiSSE full model                                                                                                                            | -895.706       | 1823.521        | 11.923       |
| HiSSE: $\tau_{0A}=\tau_{0B}$ , $\epsilon_{0A}=\epsilon_{0B}$ , $q_{0B1B}=0$ , $q_{1B0B}=0$ , All other q's equal                            | -899.44        | 1812.896        | 1.3          |
| HiSSE: $\tau_{0A}=\tau_{0B}$ , $\epsilon$ 's equal, $q_{0B1B}=0$ , $q_{1B0B}=0$ , All other q's equal                                       | -897.76        | 1813.521        | 1.923        |
| HiSSE: q's and $\epsilon$ 's equal                                                                                                          | -908.375       | 1828.751        | 16.377       |
| HiSSE: q's equal                                                                                                                            | -905.77        | 1829.55         | 17.152       |
| CID-2: q's equal and $\epsilon$ 's equal                                                                                                    | -906.591       | 1821.312        | 9.714        |
| HiSSE: $\tau_{0A}=\tau_{0B}$ , $\epsilon_{0A}=\epsilon_{0B}$                                                                                | -904.426       | 1822.853        | 11.255       |
| HiSSE: $\tau_{0A}=\tau_{1A}$ , $\epsilon_{0A}=\epsilon_{1A}$ , q's equal                                                                    | -905.968       | 1825.937        | 14.339       |
| HiSSE: $\tau_{0A}=\tau_{1A}=\tau_{0B}$ , $\epsilon$ 's and q's equal                                                                        | -909.93        | 1827.878        | 16.28        |
| HiSSE: $\tau_{0A}=\tau_{0B}$ , $\epsilon$ 's and q's equal                                                                                  | -907.96        | 1825.93         | 14.332       |
| HiSSE: $\tau_{0A}=\tau_{1A}$ , $\epsilon$ 's and q's equal                                                                                  | -908.76        | 1826.255        | 14.657       |
| CID-2: q's equal                                                                                                                            | 906.591-       | 1823.183        | 11.585       |
| HiSSE: $\tau_{0A}=\tau_{1A}=\tau_{0B}$ , $\epsilon_{0A}=\epsilon_{1A}=\epsilon_{1B}$ , q's equal                                            | -907.552       | 1825.044        | 13.446       |
| HiSSE: 25 $\tau_{0A}=\tau_{1A}=\tau_{0B}$ , $\epsilon_{0A}=\epsilon_{1A}=\epsilon_{0B}$ , $q_{0B1B}=0$ , $q_{1B0B}=0$ , All other q's equal | -907.778       | 1825.556        | 13.958       |
| BiSSE model: q's equal                                                                                                                      | -914.4616      | 1838.923        | 27.325       |
| CID-4: $\epsilon$ 's and q's equal                                                                                                          | -927.820       | 1867.641        | 56.043       |
| BiSSE model: q's equal, $\epsilon_0=\epsilon_1$                                                                                             | -906.786       | 1841.536        | 29.938       |
| BiSSE model: All free                                                                                                                       | -913.091       | 1834.183        | 22.585       |
| HiSSE $\tau_{0A}=\tau_{1A}=\tau_{0B}$ , $\epsilon$ 's equal, $q_{0B1B}=0$ , $q_{1B0B}=0$ , All other q's equal                              | -910.34        | 1828.69         | 17.092       |
| BiSSE model: $\epsilon_0=\epsilon_1$                                                                                                        | -916.701       | 1843.409        | 11.255       |
